# Supplementary material for: Heritable epigenetic changes are constrained by the dynamics of regulatory architectures
Source: bioRxiv preprint, doi:10.1101/2023.06.07.544138, version 3 (2023-12-08)
Supplement: Table S1 [file 544138_file03.xlsx]

## Sheet: Table_S1_SteadyStates_for_26_HR
x0	y0	z0	Tx	Ty	Tz	kxy	kyx	kxz	kzx	kyz	kzy	HRA
10	10	0	0.05	0.05	0	0.05	0.05	0	0	0	0	A
10	6.25	0	0.05	0.05	0	0.08	0.03125	0	0	0	0	A
10	4.54545	0	0.05	0.05	0	0.11	0.0227273	0	0	0	0	A
10	3.57143	0	0.05	0.05	0	0.14	0.0178571	0	0	0	0	A
10	10	0	0.05	0.08	0	0.05	0.08	0	0	0	0	A
10	6.25	0	0.05	0.08	0	0.08	0.05	0	0	0	0	A
10	4.54545	0	0.05	0.08	0	0.11	0.0363636	0	0	0	0	A
10	3.57143	0	0.05	0.08	0	0.14	0.0285714	0	0	0	0	A
10	10	0	0.05	0.11	0	0.05	0.11	0	0	0	0	A
10	6.25	0	0.05	0.11	0	0.08	0.06875	0	0	0	0	A
10	4.54545	0	0.05	0.11	0	0.11	0.05	0	0	0	0	A
10	3.57143	0	0.05	0.11	0	0.14	0.0392857	0	0	0	0	A
10	10	0	0.05	0.14	0	0.05	0.14	0	0	0	0	A
10	6.25	0	0.05	0.14	0	0.08	0.0875	0	0	0	0	A
10	4.54545	0	0.05	0.14	0	0.11	0.0636364	0	0	0	0	A
10	3.57143	0	0.05	0.14	0	0.14	0.05	0	0	0	0	A
10	16	0	0.08	0.05	0	0.05	0.08	0	0	0	0	A
10	10	0	0.08	0.05	0	0.08	0.05	0	0	0	0	A
10	7.27273	0	0.08	0.05	0	0.11	0.0363636	0	0	0	0	A
10	5.71429	0	0.08	0.05	0	0.14	0.0285714	0	0	0	0	A
10	16	0	0.08	0.08	0	0.05	0.128	0	0	0	0	A
10	10	0	0.08	0.08	0	0.08	0.08	0	0	0	0	A
10	7.27273	0	0.08	0.08	0	0.11	0.0581818	0	0	0	0	A
10	5.71429	0	0.08	0.08	0	0.14	0.0457143	0	0	0	0	A
10	16	0	0.08	0.11	0	0.05	0.176	0	0	0	0	A
10	10	0	0.08	0.11	0	0.08	0.11	0	0	0	0	A
10	7.27273	0	0.08	0.11	0	0.11	0.08	0	0	0	0	A
10	5.71429	0	0.08	0.11	0	0.14	0.0628571	0	0	0	0	A
10	16	0	0.08	0.14	0	0.05	0.224	0	0	0	0	A
10	10	0	0.08	0.14	0	0.08	0.14	0	0	0	0	A
10	7.27273	0	0.08	0.14	0	0.11	0.101818	0	0	0	0	A
10	5.71429	0	0.08	0.14	0	0.14	0.08	0	0	0	0	A
10	22	0	0.11	0.05	0	0.05	0.11	0	0	0	0	A
10	13.75	0	0.11	0.05	0	0.08	0.06875	0	0	0	0	A
10	10	0	0.11	0.05	0	0.11	0.05	0	0	0	0	A
10	7.85714	0	0.11	0.05	0	0.14	0.0392857	0	0	0	0	A
10	22	0	0.11	0.08	0	0.05	0.176	0	0	0	0	A
10	13.75	0	0.11	0.08	0	0.08	0.11	0	0	0	0	A
10	10	0	0.11	0.08	0	0.11	0.08	0	0	0	0	A
10	7.85714	0	0.11	0.08	0	0.14	0.0628571	0	0	0	0	A
10	22	0	0.11	0.11	0	0.05	0.242	0	0	0	0	A
10	13.75	0	0.11	0.11	0	0.08	0.15125	0	0	0	0	A
10	10	0	0.11	0.11	0	0.11	0.11	0	0	0	0	A
10	7.85714	0	0.11	0.11	0	0.14	0.0864286	0	0	0	0	A
10	22	0	0.11	0.14	0	0.05	0.308	0	0	0	0	A
10	13.75	0	0.11	0.14	0	0.08	0.1925	0	0	0	0	A
10	10	0	0.11	0.14	0	0.11	0.14	0	0	0	0	A
10	7.85714	0	0.11	0.14	0	0.14	0.11	0	0	0	0	A
10	28	0	0.14	0.05	0	0.05	0.14	0	0	0	0	A
10	17.5	0	0.14	0.05	0	0.08	0.0875	0	0	0	0	A
10	12.7273	0	0.14	0.05	0	0.11	0.0636364	0	0	0	0	A
10	10	0	0.14	0.05	0	0.14	0.05	0	0	0	0	A
10	28	0	0.14	0.08	0	0.05	0.224	0	0	0	0	A
10	17.5	0	0.14	0.08	0	0.08	0.14	0	0	0	0	A
10	12.7273	0	0.14	0.08	0	0.11	0.101818	0	0	0	0	A
10	10	0	0.14	0.08	0	0.14	0.08	0	0	0	0	A
10	28	0	0.14	0.11	0	0.05	0.308	0	0	0	0	A
10	17.5	0	0.14	0.11	0	0.08	0.1925	0	0	0	0	A
10	12.7273	0	0.14	0.11	0	0.11	0.14	0	0	0	0	A
10	10	0	0.14	0.11	0	0.14	0.11	0	0	0	0	A
10	28	0	0.14	0.14	0	0.05	0.392	0	0	0	0	A
10	17.5	0	0.14	0.14	0	0.08	0.245	0	0	0	0	A
10	12.7273	0	0.14	0.14	0	0.11	0.178182	0	0	0	0	A
10	10	0	0.14	0.14	0	0.14	0.14	0	0	0	0	A
10	10	10	0.05	0.05	0.05	0.05	0.05	0	0	0	0.05	B
10	10	16	0.05	0.05	0.05	0.05	0.05	0	0	0	0.08	B
10	10	22	0.05	0.05	0.05	0.05	0.05	0	0	0	0.11	B
10	10	28	0.05	0.05	0.05	0.05	0.05	0	0	0	0.14	B
10	6.25	6.25	0.05	0.05	0.05	0.08	0.03125	0	0	0	0.05	B
10	6.25	10	0.05	0.05	0.05	0.08	0.03125	0	0	0	0.08	B
10	6.25	13.75	0.05	0.05	0.05	0.08	0.03125	0	0	0	0.11	B
10	6.25	17.5	0.05	0.05	0.05	0.08	0.03125	0	0	0	0.14	B
10	4.54545	4.54545	0.05	0.05	0.05	0.11	0.0227273	0	0	0	0.05	B
10	4.54545	7.27273	0.05	0.05	0.05	0.11	0.0227273	0	0	0	0.08	B
10	4.54545	10	0.05	0.05	0.05	0.11	0.0227273	0	0	0	0.11	B
10	4.54545	12.7273	0.05	0.05	0.05	0.11	0.0227273	0	0	0	0.14	B
10	3.57143	3.57143	0.05	0.05	0.05	0.14	0.0178571	0	0	0	0.05	B
10	3.57143	5.71429	0.05	0.05	0.05	0.14	0.0178571	0	0	0	0.08	B
10	3.57143	7.85714	0.05	0.05	0.05	0.14	0.0178571	0	0	0	0.11	B
10	3.57143	10	0.05	0.05	0.05	0.14	0.0178571	0	0	0	0.14	B
10	10	6.25	0.05	0.05	0.08	0.05	0.05	0	0	0	0.05	B
10	10	10	0.05	0.05	0.08	0.05	0.05	0	0	0	0.08	B
10	10	13.75	0.05	0.05	0.08	0.05	0.05	0	0	0	0.11	B
10	10	17.5	0.05	0.05	0.08	0.05	0.05	0	0	0	0.14	B
10	6.25	3.90625	0.05	0.05	0.08	0.08	0.03125	0	0	0	0.05	B
10	6.25	6.25	0.05	0.05	0.08	0.08	0.03125	0	0	0	0.08	B
10	6.25	8.59375	0.05	0.05	0.08	0.08	0.03125	0	0	0	0.11	B
10	6.25	10.9375	0.05	0.05	0.08	0.08	0.03125	0	0	0	0.14	B
10	4.54545	2.84091	0.05	0.05	0.08	0.11	0.0227273	0	0	0	0.05	B
10	4.54545	4.54545	0.05	0.05	0.08	0.11	0.0227273	0	0	0	0.08	B
10	4.54545	6.25	0.05	0.05	0.08	0.11	0.0227273	0	0	0	0.11	B
10	4.54545	7.95455	0.05	0.05	0.08	0.11	0.0227273	0	0	0	0.14	B
10	3.57143	2.23214	0.05	0.05	0.08	0.14	0.0178571	0	0	0	0.05	B
10	3.57143	3.57143	0.05	0.05	0.08	0.14	0.0178571	0	0	0	0.08	B
10	3.57143	4.91071	0.05	0.05	0.08	0.14	0.0178571	0	0	0	0.11	B
10	3.57143	6.25	0.05	0.05	0.08	0.14	0.0178571	0	0	0	0.14	B
10	10	4.54545	0.05	0.05	0.11	0.05	0.05	0	0	0	0.05	B
10	10	7.27273	0.05	0.05	0.11	0.05	0.05	0	0	0	0.08	B
10	10	10	0.05	0.05	0.11	0.05	0.05	0	0	0	0.11	B
10	10	12.7273	0.05	0.05	0.11	0.05	0.05	0	0	0	0.14	B
10	6.25	2.84091	0.05	0.05	0.11	0.08	0.03125	0	0	0	0.05	B
10	6.25	4.54545	0.05	0.05	0.11	0.08	0.03125	0	0	0	0.08	B
10	6.25	6.25	0.05	0.05	0.11	0.08	0.03125	0	0	0	0.11	B
10	6.25	7.95455	0.05	0.05	0.11	0.08	0.03125	0	0	0	0.14	B
10	4.54545	2.06612	0.05	0.05	0.11	0.11	0.0227273	0	0	0	0.05	B
10	4.54545	3.30579	0.05	0.05	0.11	0.11	0.0227273	0	0	0	0.08	B
10	4.54545	4.54545	0.05	0.05	0.11	0.11	0.0227273	0	0	0	0.11	B
10	4.54545	5.78512	0.05	0.05	0.11	0.11	0.0227273	0	0	0	0.14	B
10	3.57143	1.62338	0.05	0.05	0.11	0.14	0.0178571	0	0	0	0.05	B
10	3.57143	2.5974	0.05	0.05	0.11	0.14	0.0178571	0	0	0	0.08	B
10	3.57143	3.57143	0.05	0.05	0.11	0.14	0.0178571	0	0	0	0.11	B
10	3.57143	4.54545	0.05	0.05	0.11	0.14	0.0178571	0	0	0	0.14	B
10	10	3.57143	0.05	0.05	0.14	0.05	0.05	0	0	0	0.05	B
10	10	5.71429	0.05	0.05	0.14	0.05	0.05	0	0	0	0.08	B
10	10	7.85714	0.05	0.05	0.14	0.05	0.05	0	0	0	0.11	B
10	10	10	0.05	0.05	0.14	0.05	0.05	0	0	0	0.14	B
10	6.25	2.23214	0.05	0.05	0.14	0.08	0.03125	0	0	0	0.05	B
10	6.25	3.57143	0.05	0.05	0.14	0.08	0.03125	0	0	0	0.08	B
10	6.25	4.91071	0.05	0.05	0.14	0.08	0.03125	0	0	0	0.11	B
10	6.25	6.25	0.05	0.05	0.14	0.08	0.03125	0	0	0	0.14	B
10	4.54545	1.62338	0.05	0.05	0.14	0.11	0.0227273	0	0	0	0.05	B
10	4.54545	2.5974	0.05	0.05	0.14	0.11	0.0227273	0	0	0	0.08	B
10	4.54545	3.57143	0.05	0.05	0.14	0.11	0.0227273	0	0	0	0.11	B
10	4.54545	4.54545	0.05	0.05	0.14	0.11	0.0227273	0	0	0	0.14	B
10	3.57143	1.27551	0.05	0.05	0.14	0.14	0.0178571	0	0	0	0.05	B
10	3.57143	2.04082	0.05	0.05	0.14	0.14	0.0178571	0	0	0	0.08	B
10	3.57143	2.80612	0.05	0.05	0.14	0.14	0.0178571	0	0	0	0.11	B
10	3.57143	3.57143	0.05	0.05	0.14	0.14	0.0178571	0	0	0	0.14	B
10	10	10	0.05	0.08	0.05	0.05	0.08	0	0	0	0.05	B
10	10	16	0.05	0.08	0.05	0.05	0.08	0	0	0	0.08	B
10	10	22	0.05	0.08	0.05	0.05	0.08	0	0	0	0.11	B
10	10	28	0.05	0.08	0.05	0.05	0.08	0	0	0	0.14	B
10	6.25	6.25	0.05	0.08	0.05	0.08	0.05	0	0	0	0.05	B
10	6.25	10	0.05	0.08	0.05	0.08	0.05	0	0	0	0.08	B
10	6.25	13.75	0.05	0.08	0.05	0.08	0.05	0	0	0	0.11	B
10	6.25	17.5	0.05	0.08	0.05	0.08	0.05	0	0	0	0.14	B
10	4.54545	4.54545	0.05	0.08	0.05	0.11	0.0363636	0	0	0	0.05	B
10	4.54545	7.27273	0.05	0.08	0.05	0.11	0.0363636	0	0	0	0.08	B
10	4.54545	10	0.05	0.08	0.05	0.11	0.0363636	0	0	0	0.11	B
10	4.54545	12.7273	0.05	0.08	0.05	0.11	0.0363636	0	0	0	0.14	B
10	3.57143	3.57143	0.05	0.08	0.05	0.14	0.0285714	0	0	0	0.05	B
10	3.57143	5.71429	0.05	0.08	0.05	0.14	0.0285714	0	0	0	0.08	B
10	3.57143	7.85714	0.05	0.08	0.05	0.14	0.0285714	0	0	0	0.11	B
10	3.57143	10	0.05	0.08	0.05	0.14	0.0285714	0	0	0	0.14	B
10	10	6.25	0.05	0.08	0.08	0.05	0.08	0	0	0	0.05	B
10	10	10	0.05	0.08	0.08	0.05	0.08	0	0	0	0.08	B
10	10	13.75	0.05	0.08	0.08	0.05	0.08	0	0	0	0.11	B
10	10	17.5	0.05	0.08	0.08	0.05	0.08	0	0	0	0.14	B
10	6.25	3.90625	0.05	0.08	0.08	0.08	0.05	0	0	0	0.05	B
10	6.25	6.25	0.05	0.08	0.08	0.08	0.05	0	0	0	0.08	B
10	6.25	8.59375	0.05	0.08	0.08	0.08	0.05	0	0	0	0.11	B
10	6.25	10.9375	0.05	0.08	0.08	0.08	0.05	0	0	0	0.14	B
10	4.54545	2.84091	0.05	0.08	0.08	0.11	0.0363636	0	0	0	0.05	B
10	4.54545	4.54545	0.05	0.08	0.08	0.11	0.0363636	0	0	0	0.08	B
10	4.54545	6.25	0.05	0.08	0.08	0.11	0.0363636	0	0	0	0.11	B
10	4.54545	7.95455	0.05	0.08	0.08	0.11	0.0363636	0	0	0	0.14	B
10	3.57143	2.23214	0.05	0.08	0.08	0.14	0.0285714	0	0	0	0.05	B
10	3.57143	3.57143	0.05	0.08	0.08	0.14	0.0285714	0	0	0	0.08	B
10	3.57143	4.91071	0.05	0.08	0.08	0.14	0.0285714	0	0	0	0.11	B
10	3.57143	6.25	0.05	0.08	0.08	0.14	0.0285714	0	0	0	0.14	B
10	10	4.54545	0.05	0.08	0.11	0.05	0.08	0	0	0	0.05	B
10	10	7.27273	0.05	0.08	0.11	0.05	0.08	0	0	0	0.08	B
10	10	10	0.05	0.08	0.11	0.05	0.08	0	0	0	0.11	B
10	10	12.7273	0.05	0.08	0.11	0.05	0.08	0	0	0	0.14	B
10	6.25	2.84091	0.05	0.08	0.11	0.08	0.05	0	0	0	0.05	B
10	6.25	4.54545	0.05	0.08	0.11	0.08	0.05	0	0	0	0.08	B
10	6.25	6.25	0.05	0.08	0.11	0.08	0.05	0	0	0	0.11	B
10	6.25	7.95455	0.05	0.08	0.11	0.08	0.05	0	0	0	0.14	B
10	4.54545	2.06612	0.05	0.08	0.11	0.11	0.0363636	0	0	0	0.05	B
10	4.54545	3.30579	0.05	0.08	0.11	0.11	0.0363636	0	0	0	0.08	B
10	4.54545	4.54545	0.05	0.08	0.11	0.11	0.0363636	0	0	0	0.11	B
10	4.54545	5.78512	0.05	0.08	0.11	0.11	0.0363636	0	0	0	0.14	B
10	3.57143	1.62338	0.05	0.08	0.11	0.14	0.0285714	0	0	0	0.05	B
10	3.57143	2.5974	0.05	0.08	0.11	0.14	0.0285714	0	0	0	0.08	B
10	3.57143	3.57143	0.05	0.08	0.11	0.14	0.0285714	0	0	0	0.11	B
10	3.57143	4.54545	0.05	0.08	0.11	0.14	0.0285714	0	0	0	0.14	B
10	10	3.57143	0.05	0.08	0.14	0.05	0.08	0	0	0	0.05	B
10	10	5.71429	0.05	0.08	0.14	0.05	0.08	0	0	0	0.08	B
10	10	7.85714	0.05	0.08	0.14	0.05	0.08	0	0	0	0.11	B
10	10	10	0.05	0.08	0.14	0.05	0.08	0	0	0	0.14	B
10	6.25	2.23214	0.05	0.08	0.14	0.08	0.05	0	0	0	0.05	B
10	6.25	3.57143	0.05	0.08	0.14	0.08	0.05	0	0	0	0.08	B
10	6.25	4.91071	0.05	0.08	0.14	0.08	0.05	0	0	0	0.11	B
10	6.25	6.25	0.05	0.08	0.14	0.08	0.05	0	0	0	0.14	B
10	4.54545	1.62338	0.05	0.08	0.14	0.11	0.0363636	0	0	0	0.05	B
10	4.54545	2.5974	0.05	0.08	0.14	0.11	0.0363636	0	0	0	0.08	B
10	4.54545	3.57143	0.05	0.08	0.14	0.11	0.0363636	0	0	0	0.11	B
10	4.54545	4.54545	0.05	0.08	0.14	0.11	0.0363636	0	0	0	0.14	B
10	3.57143	1.27551	0.05	0.08	0.14	0.14	0.0285714	0	0	0	0.05	B
10	3.57143	2.04082	0.05	0.08	0.14	0.14	0.0285714	0	0	0	0.08	B
10	3.57143	2.80612	0.05	0.08	0.14	0.14	0.0285714	0	0	0	0.11	B
10	3.57143	3.57143	0.05	0.08	0.14	0.14	0.0285714	0	0	0	0.14	B
10	10	10	0.05	0.11	0.05	0.05	0.11	0	0	0	0.05	B
10	10	16	0.05	0.11	0.05	0.05	0.11	0	0	0	0.08	B
10	10	22	0.05	0.11	0.05	0.05	0.11	0	0	0	0.11	B
10	10	28	0.05	0.11	0.05	0.05	0.11	0	0	0	0.14	B
10	6.25	6.25	0.05	0.11	0.05	0.08	0.06875	0	0	0	0.05	B
10	6.25	10	0.05	0.11	0.05	0.08	0.06875	0	0	0	0.08	B
10	6.25	13.75	0.05	0.11	0.05	0.08	0.06875	0	0	0	0.11	B
10	6.25	17.5	0.05	0.11	0.05	0.08	0.06875	0	0	0	0.14	B
10	4.54545	4.54545	0.05	0.11	0.05	0.11	0.05	0	0	0	0.05	B
10	4.54545	7.27273	0.05	0.11	0.05	0.11	0.05	0	0	0	0.08	B
10	4.54545	10	0.05	0.11	0.05	0.11	0.05	0	0	0	0.11	B
10	4.54545	12.7273	0.05	0.11	0.05	0.11	0.05	0	0	0	0.14	B
10	3.57143	3.57143	0.05	0.11	0.05	0.14	0.0392857	0	0	0	0.05	B
10	3.57143	5.71429	0.05	0.11	0.05	0.14	0.0392857	0	0	0	0.08	B
10	3.57143	7.85714	0.05	0.11	0.05	0.14	0.0392857	0	0	0	0.11	B
10	3.57143	10	0.05	0.11	0.05	0.14	0.0392857	0	0	0	0.14	B
10	10	6.25	0.05	0.11	0.08	0.05	0.11	0	0	0	0.05	B
10	10	10	0.05	0.11	0.08	0.05	0.11	0	0	0	0.08	B
10	10	13.75	0.05	0.11	0.08	0.05	0.11	0	0	0	0.11	B
10	10	17.5	0.05	0.11	0.08	0.05	0.11	0	0	0	0.14	B
10	6.25	3.90625	0.05	0.11	0.08	0.08	0.06875	0	0	0	0.05	B
10	6.25	6.25	0.05	0.11	0.08	0.08	0.06875	0	0	0	0.08	B
10	6.25	8.59375	0.05	0.11	0.08	0.08	0.06875	0	0	0	0.11	B
10	6.25	10.9375	0.05	0.11	0.08	0.08	0.06875	0	0	0	0.14	B
10	4.54545	2.84091	0.05	0.11	0.08	0.11	0.05	0	0	0	0.05	B
10	4.54545	4.54545	0.05	0.11	0.08	0.11	0.05	0	0	0	0.08	B
10	4.54545	6.25	0.05	0.11	0.08	0.11	0.05	0	0	0	0.11	B
10	4.54545	7.95455	0.05	0.11	0.08	0.11	0.05	0	0	0	0.14	B
10	3.57143	2.23214	0.05	0.11	0.08	0.14	0.0392857	0	0	0	0.05	B
10	3.57143	3.57143	0.05	0.11	0.08	0.14	0.0392857	0	0	0	0.08	B
10	3.57143	4.91071	0.05	0.11	0.08	0.14	0.0392857	0	0	0	0.11	B
10	3.57143	6.25	0.05	0.11	0.08	0.14	0.0392857	0	0	0	0.14	B
10	10	4.54545	0.05	0.11	0.11	0.05	0.11	0	0	0	0.05	B
10	10	7.27273	0.05	0.11	0.11	0.05	0.11	0	0	0	0.08	B
10	10	10	0.05	0.11	0.11	0.05	0.11	0	0	0	0.11	B
10	10	12.7273	0.05	0.11	0.11	0.05	0.11	0	0	0	0.14	B
10	6.25	2.84091	0.05	0.11	0.11	0.08	0.06875	0	0	0	0.05	B
10	6.25	4.54545	0.05	0.11	0.11	0.08	0.06875	0	0	0	0.08	B
10	6.25	6.25	0.05	0.11	0.11	0.08	0.06875	0	0	0	0.11	B
10	6.25	7.95455	0.05	0.11	0.11	0.08	0.06875	0	0	0	0.14	B
10	4.54545	2.06612	0.05	0.11	0.11	0.11	0.05	0	0	0	0.05	B
10	4.54545	3.30579	0.05	0.11	0.11	0.11	0.05	0	0	0	0.08	B
10	4.54545	4.54545	0.05	0.11	0.11	0.11	0.05	0	0	0	0.11	B
10	4.54545	5.78512	0.05	0.11	0.11	0.11	0.05	0	0	0	0.14	B
10	3.57143	1.62338	0.05	0.11	0.11	0.14	0.0392857	0	0	0	0.05	B
10	3.57143	2.5974	0.05	0.11	0.11	0.14	0.0392857	0	0	0	0.08	B
10	3.57143	3.57143	0.05	0.11	0.11	0.14	0.0392857	0	0	0	0.11	B
10	3.57143	4.54545	0.05	0.11	0.11	0.14	0.0392857	0	0	0	0.14	B
10	10	3.57143	0.05	0.11	0.14	0.05	0.11	0	0	0	0.05	B
10	10	5.71429	0.05	0.11	0.14	0.05	0.11	0	0	0	0.08	B
10	10	7.85714	0.05	0.11	0.14	0.05	0.11	0	0	0	0.11	B
10	10	10	0.05	0.11	0.14	0.05	0.11	0	0	0	0.14	B
10	6.25	2.23214	0.05	0.11	0.14	0.08	0.06875	0	0	0	0.05	B
10	6.25	3.57143	0.05	0.11	0.14	0.08	0.06875	0	0	0	0.08	B
10	6.25	4.91071	0.05	0.11	0.14	0.08	0.06875	0	0	0	0.11	B
10	6.25	6.25	0.05	0.11	0.14	0.08	0.06875	0	0	0	0.14	B
10	4.54545	1.62338	0.05	0.11	0.14	0.11	0.05	0	0	0	0.05	B
10	4.54545	2.5974	0.05	0.11	0.14	0.11	0.05	0	0	0	0.08	B
10	4.54545	3.57143	0.05	0.11	0.14	0.11	0.05	0	0	0	0.11	B
10	4.54545	4.54545	0.05	0.11	0.14	0.11	0.05	0	0	0	0.14	B
10	3.57143	1.27551	0.05	0.11	0.14	0.14	0.0392857	0	0	0	0.05	B
10	3.57143	2.04082	0.05	0.11	0.14	0.14	0.0392857	0	0	0	0.08	B
10	3.57143	2.80612	0.05	0.11	0.14	0.14	0.0392857	0	0	0	0.11	B
10	3.57143	3.57143	0.05	0.11	0.14	0.14	0.0392857	0	0	0	0.14	B
10	10	10	0.05	0.14	0.05	0.05	0.14	0	0	0	0.05	B
10	10	16	0.05	0.14	0.05	0.05	0.14	0	0	0	0.08	B
10	10	22	0.05	0.14	0.05	0.05	0.14	0	0	0	0.11	B
10	10	28	0.05	0.14	0.05	0.05	0.14	0	0	0	0.14	B
10	6.25	6.25	0.05	0.14	0.05	0.08	0.0875	0	0	0	0.05	B
10	6.25	10	0.05	0.14	0.05	0.08	0.0875	0	0	0	0.08	B
10	6.25	13.75	0.05	0.14	0.05	0.08	0.0875	0	0	0	0.11	B
10	6.25	17.5	0.05	0.14	0.05	0.08	0.0875	0	0	0	0.14	B
10	4.54545	4.54545	0.05	0.14	0.05	0.11	0.0636364	0	0	0	0.05	B
10	4.54545	7.27273	0.05	0.14	0.05	0.11	0.0636364	0	0	0	0.08	B
10	4.54545	10	0.05	0.14	0.05	0.11	0.0636364	0	0	0	0.11	B
10	4.54545	12.7273	0.05	0.14	0.05	0.11	0.0636364	0	0	0	0.14	B
10	3.57143	3.57143	0.05	0.14	0.05	0.14	0.05	0	0	0	0.05	B
10	3.57143	5.71429	0.05	0.14	0.05	0.14	0.05	0	0	0	0.08	B
10	3.57143	7.85714	0.05	0.14	0.05	0.14	0.05	0	0	0	0.11	B
10	3.57143	10	0.05	0.14	0.05	0.14	0.05	0	0	0	0.14	B
10	10	6.25	0.05	0.14	0.08	0.05	0.14	0	0	0	0.05	B
10	10	10	0.05	0.14	0.08	0.05	0.14	0	0	0	0.08	B
10	10	13.75	0.05	0.14	0.08	0.05	0.14	0	0	0	0.11	B
10	10	17.5	0.05	0.14	0.08	0.05	0.14	0	0	0	0.14	B
10	6.25	3.90625	0.05	0.14	0.08	0.08	0.0875	0	0	0	0.05	B
10	6.25	6.25	0.05	0.14	0.08	0.08	0.0875	0	0	0	0.08	B
10	6.25	8.59375	0.05	0.14	0.08	0.08	0.0875	0	0	0	0.11	B
10	6.25	10.9375	0.05	0.14	0.08	0.08	0.0875	0	0	0	0.14	B
10	4.54545	2.84091	0.05	0.14	0.08	0.11	0.0636364	0	0	0	0.05	B
10	4.54545	4.54545	0.05	0.14	0.08	0.11	0.0636364	0	0	0	0.08	B
10	4.54545	6.25	0.05	0.14	0.08	0.11	0.0636364	0	0	0	0.11	B
10	4.54545	7.95455	0.05	0.14	0.08	0.11	0.0636364	0	0	0	0.14	B
10	3.57143	2.23214	0.05	0.14	0.08	0.14	0.05	0	0	0	0.05	B
10	3.57143	3.57143	0.05	0.14	0.08	0.14	0.05	0	0	0	0.08	B
10	3.57143	4.91071	0.05	0.14	0.08	0.14	0.05	0	0	0	0.11	B
10	3.57143	6.25	0.05	0.14	0.08	0.14	0.05	0	0	0	0.14	B
10	10	4.54545	0.05	0.14	0.11	0.05	0.14	0	0	0	0.05	B
10	10	7.27273	0.05	0.14	0.11	0.05	0.14	0	0	0	0.08	B
10	10	10	0.05	0.14	0.11	0.05	0.14	0	0	0	0.11	B
10	10	12.7273	0.05	0.14	0.11	0.05	0.14	0	0	0	0.14	B
10	6.25	2.84091	0.05	0.14	0.11	0.08	0.0875	0	0	0	0.05	B
10	6.25	4.54545	0.05	0.14	0.11	0.08	0.0875	0	0	0	0.08	B
10	6.25	6.25	0.05	0.14	0.11	0.08	0.0875	0	0	0	0.11	B
10	6.25	7.95455	0.05	0.14	0.11	0.08	0.0875	0	0	0	0.14	B
10	4.54545	2.06612	0.05	0.14	0.11	0.11	0.0636364	0	0	0	0.05	B
10	4.54545	3.30579	0.05	0.14	0.11	0.11	0.0636364	0	0	0	0.08	B
10	4.54545	4.54545	0.05	0.14	0.11	0.11	0.0636364	0	0	0	0.11	B
10	4.54545	5.78512	0.05	0.14	0.11	0.11	0.0636364	0	0	0	0.14	B
10	3.57143	1.62338	0.05	0.14	0.11	0.14	0.05	0	0	0	0.05	B
10	3.57143	2.5974	0.05	0.14	0.11	0.14	0.05	0	0	0	0.08	B
10	3.57143	3.57143	0.05	0.14	0.11	0.14	0.05	0	0	0	0.11	B
10	3.57143	4.54545	0.05	0.14	0.11	0.14	0.05	0	0	0	0.14	B
10	10	3.57143	0.05	0.14	0.14	0.05	0.14	0	0	0	0.05	B
10	10	5.71429	0.05	0.14	0.14	0.05	0.14	0	0	0	0.08	B
10	10	7.85714	0.05	0.14	0.14	0.05	0.14	0	0	0	0.11	B
10	10	10	0.05	0.14	0.14	0.05	0.14	0	0	0	0.14	B
10	6.25	2.23214	0.05	0.14	0.14	0.08	0.0875	0	0	0	0.05	B
10	6.25	3.57143	0.05	0.14	0.14	0.08	0.0875	0	0	0	0.08	B
10	6.25	4.91071	0.05	0.14	0.14	0.08	0.0875	0	0	0	0.11	B
10	6.25	6.25	0.05	0.14	0.14	0.08	0.0875	0	0	0	0.14	B
10	4.54545	1.62338	0.05	0.14	0.14	0.11	0.0636364	0	0	0	0.05	B
10	4.54545	2.5974	0.05	0.14	0.14	0.11	0.0636364	0	0	0	0.08	B
10	4.54545	3.57143	0.05	0.14	0.14	0.11	0.0636364	0	0	0	0.11	B
10	4.54545	4.54545	0.05	0.14	0.14	0.11	0.0636364	0	0	0	0.14	B
10	3.57143	1.27551	0.05	0.14	0.14	0.14	0.05	0	0	0	0.05	B
10	3.57143	2.04082	0.05	0.14	0.14	0.14	0.05	0	0	0	0.08	B
10	3.57143	2.80612	0.05	0.14	0.14	0.14	0.05	0	0	0	0.11	B
10	3.57143	3.57143	0.05	0.14	0.14	0.14	0.05	0	0	0	0.14	B
10	16	16	0.08	0.05	0.05	0.05	0.08	0	0	0	0.05	B
10	16	25.6	0.08	0.05	0.05	0.05	0.08	0	0	0	0.08	B
10	16	35.2	0.08	0.05	0.05	0.05	0.08	0	0	0	0.11	B
10	16	44.8	0.08	0.05	0.05	0.05	0.08	0	0	0	0.14	B
10	10	10	0.08	0.05	0.05	0.08	0.05	0	0	0	0.05	B
10	10	16	0.08	0.05	0.05	0.08	0.05	0	0	0	0.08	B
10	10	22	0.08	0.05	0.05	0.08	0.05	0	0	0	0.11	B
10	10	28	0.08	0.05	0.05	0.08	0.05	0	0	0	0.14	B
10	7.27273	7.27273	0.08	0.05	0.05	0.11	0.0363636	0	0	0	0.05	B
10	7.27273	11.6364	0.08	0.05	0.05	0.11	0.0363636	0	0	0	0.08	B
10	7.27273	16	0.08	0.05	0.05	0.11	0.0363636	0	0	0	0.11	B
10	7.27273	20.3636	0.08	0.05	0.05	0.11	0.0363636	0	0	0	0.14	B
10	5.71429	5.71429	0.08	0.05	0.05	0.14	0.0285714	0	0	0	0.05	B
10	5.71429	9.14286	0.08	0.05	0.05	0.14	0.0285714	0	0	0	0.08	B
10	5.71429	12.5714	0.08	0.05	0.05	0.14	0.0285714	0	0	0	0.11	B
10	5.71429	16	0.08	0.05	0.05	0.14	0.0285714	0	0	0	0.14	B
10	16	10	0.08	0.05	0.08	0.05	0.08	0	0	0	0.05	B
10	16	16	0.08	0.05	0.08	0.05	0.08	0	0	0	0.08	B
10	16	22	0.08	0.05	0.08	0.05	0.08	0	0	0	0.11	B
10	16	28	0.08	0.05	0.08	0.05	0.08	0	0	0	0.14	B
10	10	6.25	0.08	0.05	0.08	0.08	0.05	0	0	0	0.05	B
10	10	10	0.08	0.05	0.08	0.08	0.05	0	0	0	0.08	B
10	10	13.75	0.08	0.05	0.08	0.08	0.05	0	0	0	0.11	B
10	10	17.5	0.08	0.05	0.08	0.08	0.05	0	0	0	0.14	B
10	7.27273	4.54545	0.08	0.05	0.08	0.11	0.0363636	0	0	0	0.05	B
10	7.27273	7.27273	0.08	0.05	0.08	0.11	0.0363636	0	0	0	0.08	B
10	7.27273	10	0.08	0.05	0.08	0.11	0.0363636	0	0	0	0.11	B
10	7.27273	12.7273	0.08	0.05	0.08	0.11	0.0363636	0	0	0	0.14	B
10	5.71429	3.57143	0.08	0.05	0.08	0.14	0.0285714	0	0	0	0.05	B
10	5.71429	5.71429	0.08	0.05	0.08	0.14	0.0285714	0	0	0	0.08	B
10	5.71429	7.85714	0.08	0.05	0.08	0.14	0.0285714	0	0	0	0.11	B
10	5.71429	10	0.08	0.05	0.08	0.14	0.0285714	0	0	0	0.14	B
10	16	7.27273	0.08	0.05	0.11	0.05	0.08	0	0	0	0.05	B
10	16	11.6364	0.08	0.05	0.11	0.05	0.08	0	0	0	0.08	B
10	16	16	0.08	0.05	0.11	0.05	0.08	0	0	0	0.11	B
10	16	20.3636	0.08	0.05	0.11	0.05	0.08	0	0	0	0.14	B
10	10	4.54545	0.08	0.05	0.11	0.08	0.05	0	0	0	0.05	B
10	10	7.27273	0.08	0.05	0.11	0.08	0.05	0	0	0	0.08	B
10	10	10	0.08	0.05	0.11	0.08	0.05	0	0	0	0.11	B
10	10	12.7273	0.08	0.05	0.11	0.08	0.05	0	0	0	0.14	B
10	7.27273	3.30579	0.08	0.05	0.11	0.11	0.0363636	0	0	0	0.05	B
10	7.27273	5.28926	0.08	0.05	0.11	0.11	0.0363636	0	0	0	0.08	B
10	7.27273	7.27273	0.08	0.05	0.11	0.11	0.0363636	0	0	0	0.11	B
10	7.27273	9.2562	0.08	0.05	0.11	0.11	0.0363636	0	0	0	0.14	B
10	5.71429	2.5974	0.08	0.05	0.11	0.14	0.0285714	0	0	0	0.05	B
10	5.71429	4.15584	0.08	0.05	0.11	0.14	0.0285714	0	0	0	0.08	B
10	5.71429	5.71429	0.08	0.05	0.11	0.14	0.0285714	0	0	0	0.11	B
10	5.71429	7.27273	0.08	0.05	0.11	0.14	0.0285714	0	0	0	0.14	B
10	16	5.71429	0.08	0.05	0.14	0.05	0.08	0	0	0	0.05	B
10	16	9.14286	0.08	0.05	0.14	0.05	0.08	0	0	0	0.08	B
10	16	12.5714	0.08	0.05	0.14	0.05	0.08	0	0	0	0.11	B
10	16	16	0.08	0.05	0.14	0.05	0.08	0	0	0	0.14	B
10	10	3.57143	0.08	0.05	0.14	0.08	0.05	0	0	0	0.05	B
10	10	5.71429	0.08	0.05	0.14	0.08	0.05	0	0	0	0.08	B
10	10	7.85714	0.08	0.05	0.14	0.08	0.05	0	0	0	0.11	B
10	10	10	0.08	0.05	0.14	0.08	0.05	0	0	0	0.14	B
10	7.27273	2.5974	0.08	0.05	0.14	0.11	0.0363636	0	0	0	0.05	B
10	7.27273	4.15584	0.08	0.05	0.14	0.11	0.0363636	0	0	0	0.08	B
10	7.27273	5.71429	0.08	0.05	0.14	0.11	0.0363636	0	0	0	0.11	B
10	7.27273	7.27273	0.08	0.05	0.14	0.11	0.0363636	0	0	0	0.14	B
10	5.71429	2.04082	0.08	0.05	0.14	0.14	0.0285714	0	0	0	0.05	B
10	5.71429	3.26531	0.08	0.05	0.14	0.14	0.0285714	0	0	0	0.08	B
10	5.71429	4.4898	0.08	0.05	0.14	0.14	0.0285714	0	0	0	0.11	B
10	5.71429	5.71429	0.08	0.05	0.14	0.14	0.0285714	0	0	0	0.14	B
10	16	16	0.08	0.08	0.05	0.05	0.128	0	0	0	0.05	B
10	16	25.6	0.08	0.08	0.05	0.05	0.128	0	0	0	0.08	B
10	16	35.2	0.08	0.08	0.05	0.05	0.128	0	0	0	0.11	B
10	16	44.8	0.08	0.08	0.05	0.05	0.128	0	0	0	0.14	B
10	10	10	0.08	0.08	0.05	0.08	0.08	0	0	0	0.05	B
10	10	16	0.08	0.08	0.05	0.08	0.08	0	0	0	0.08	B
10	10	22	0.08	0.08	0.05	0.08	0.08	0	0	0	0.11	B
10	10	28	0.08	0.08	0.05	0.08	0.08	0	0	0	0.14	B
10	7.27273	7.27273	0.08	0.08	0.05	0.11	0.0581818	0	0	0	0.05	B
10	7.27273	11.6364	0.08	0.08	0.05	0.11	0.0581818	0	0	0	0.08	B
10	7.27273	16	0.08	0.08	0.05	0.11	0.0581818	0	0	0	0.11	B
10	7.27273	20.3636	0.08	0.08	0.05	0.11	0.0581818	0	0	0	0.14	B
10	5.71429	5.71429	0.08	0.08	0.05	0.14	0.0457143	0	0	0	0.05	B
10	5.71429	9.14286	0.08	0.08	0.05	0.14	0.0457143	0	0	0	0.08	B
10	5.71429	12.5714	0.08	0.08	0.05	0.14	0.0457143	0	0	0	0.11	B
10	5.71429	16	0.08	0.08	0.05	0.14	0.0457143	0	0	0	0.14	B
10	16	10	0.08	0.08	0.08	0.05	0.128	0	0	0	0.05	B
10	16	16	0.08	0.08	0.08	0.05	0.128	0	0	0	0.08	B
10	16	22	0.08	0.08	0.08	0.05	0.128	0	0	0	0.11	B
10	16	28	0.08	0.08	0.08	0.05	0.128	0	0	0	0.14	B
10	10	6.25	0.08	0.08	0.08	0.08	0.08	0	0	0	0.05	B
10	10	10	0.08	0.08	0.08	0.08	0.08	0	0	0	0.08	B
10	10	13.75	0.08	0.08	0.08	0.08	0.08	0	0	0	0.11	B
10	10	17.5	0.08	0.08	0.08	0.08	0.08	0	0	0	0.14	B
10	7.27273	4.54545	0.08	0.08	0.08	0.11	0.0581818	0	0	0	0.05	B
10	7.27273	7.27273	0.08	0.08	0.08	0.11	0.0581818	0	0	0	0.08	B
10	7.27273	10	0.08	0.08	0.08	0.11	0.0581818	0	0	0	0.11	B
10	7.27273	12.7273	0.08	0.08	0.08	0.11	0.0581818	0	0	0	0.14	B
10	5.71429	3.57143	0.08	0.08	0.08	0.14	0.0457143	0	0	0	0.05	B
10	5.71429	5.71429	0.08	0.08	0.08	0.14	0.0457143	0	0	0	0.08	B
10	5.71429	7.85714	0.08	0.08	0.08	0.14	0.0457143	0	0	0	0.11	B
10	5.71429	10	0.08	0.08	0.08	0.14	0.0457143	0	0	0	0.14	B
10	16	7.27273	0.08	0.08	0.11	0.05	0.128	0	0	0	0.05	B
10	16	11.6364	0.08	0.08	0.11	0.05	0.128	0	0	0	0.08	B
10	16	16	0.08	0.08	0.11	0.05	0.128	0	0	0	0.11	B
10	16	20.3636	0.08	0.08	0.11	0.05	0.128	0	0	0	0.14	B
10	10	4.54545	0.08	0.08	0.11	0.08	0.08	0	0	0	0.05	B
10	10	7.27273	0.08	0.08	0.11	0.08	0.08	0	0	0	0.08	B
10	10	10	0.08	0.08	0.11	0.08	0.08	0	0	0	0.11	B
10	10	12.7273	0.08	0.08	0.11	0.08	0.08	0	0	0	0.14	B
10	7.27273	3.30579	0.08	0.08	0.11	0.11	0.0581818	0	0	0	0.05	B
10	7.27273	5.28926	0.08	0.08	0.11	0.11	0.0581818	0	0	0	0.08	B
10	7.27273	7.27273	0.08	0.08	0.11	0.11	0.0581818	0	0	0	0.11	B
10	7.27273	9.2562	0.08	0.08	0.11	0.11	0.0581818	0	0	0	0.14	B
10	5.71429	2.5974	0.08	0.08	0.11	0.14	0.0457143	0	0	0	0.05	B
10	5.71429	4.15584	0.08	0.08	0.11	0.14	0.0457143	0	0	0	0.08	B
10	5.71429	5.71429	0.08	0.08	0.11	0.14	0.0457143	0	0	0	0.11	B
10	5.71429	7.27273	0.08	0.08	0.11	0.14	0.0457143	0	0	0	0.14	B
10	16	5.71429	0.08	0.08	0.14	0.05	0.128	0	0	0	0.05	B
10	16	9.14286	0.08	0.08	0.14	0.05	0.128	0	0	0	0.08	B
10	16	12.5714	0.08	0.08	0.14	0.05	0.128	0	0	0	0.11	B
10	16	16	0.08	0.08	0.14	0.05	0.128	0	0	0	0.14	B
10	10	3.57143	0.08	0.08	0.14	0.08	0.08	0	0	0	0.05	B
10	10	5.71429	0.08	0.08	0.14	0.08	0.08	0	0	0	0.08	B
10	10	7.85714	0.08	0.08	0.14	0.08	0.08	0	0	0	0.11	B
10	10	10	0.08	0.08	0.14	0.08	0.08	0	0	0	0.14	B
10	7.27273	2.5974	0.08	0.08	0.14	0.11	0.0581818	0	0	0	0.05	B
10	7.27273	4.15584	0.08	0.08	0.14	0.11	0.0581818	0	0	0	0.08	B
10	7.27273	5.71429	0.08	0.08	0.14	0.11	0.0581818	0	0	0	0.11	B
10	7.27273	7.27273	0.08	0.08	0.14	0.11	0.0581818	0	0	0	0.14	B
10	5.71429	2.04082	0.08	0.08	0.14	0.14	0.0457143	0	0	0	0.05	B
10	5.71429	3.26531	0.08	0.08	0.14	0.14	0.0457143	0	0	0	0.08	B
10	5.71429	4.4898	0.08	0.08	0.14	0.14	0.0457143	0	0	0	0.11	B
10	5.71429	5.71429	0.08	0.08	0.14	0.14	0.0457143	0	0	0	0.14	B
10	16	16	0.08	0.11	0.05	0.05	0.176	0	0	0	0.05	B
10	16	25.6	0.08	0.11	0.05	0.05	0.176	0	0	0	0.08	B
10	16	35.2	0.08	0.11	0.05	0.05	0.176	0	0	0	0.11	B
10	16	44.8	0.08	0.11	0.05	0.05	0.176	0	0	0	0.14	B
10	10	10	0.08	0.11	0.05	0.08	0.11	0	0	0	0.05	B
10	10	16	0.08	0.11	0.05	0.08	0.11	0	0	0	0.08	B
10	10	22	0.08	0.11	0.05	0.08	0.11	0	0	0	0.11	B
10	10	28	0.08	0.11	0.05	0.08	0.11	0	0	0	0.14	B
10	7.27273	7.27273	0.08	0.11	0.05	0.11	0.08	0	0	0	0.05	B
10	7.27273	11.6364	0.08	0.11	0.05	0.11	0.08	0	0	0	0.08	B
10	7.27273	16	0.08	0.11	0.05	0.11	0.08	0	0	0	0.11	B
10	7.27273	20.3636	0.08	0.11	0.05	0.11	0.08	0	0	0	0.14	B
10	5.71429	5.71429	0.08	0.11	0.05	0.14	0.0628571	0	0	0	0.05	B
10	5.71429	9.14286	0.08	0.11	0.05	0.14	0.0628571	0	0	0	0.08	B
10	5.71429	12.5714	0.08	0.11	0.05	0.14	0.0628571	0	0	0	0.11	B
10	5.71429	16	0.08	0.11	0.05	0.14	0.0628571	0	0	0	0.14	B
10	16	10	0.08	0.11	0.08	0.05	0.176	0	0	0	0.05	B
10	16	16	0.08	0.11	0.08	0.05	0.176	0	0	0	0.08	B
10	16	22	0.08	0.11	0.08	0.05	0.176	0	0	0	0.11	B
10	16	28	0.08	0.11	0.08	0.05	0.176	0	0	0	0.14	B
10	10	6.25	0.08	0.11	0.08	0.08	0.11	0	0	0	0.05	B
10	10	10	0.08	0.11	0.08	0.08	0.11	0	0	0	0.08	B
10	10	13.75	0.08	0.11	0.08	0.08	0.11	0	0	0	0.11	B
10	10	17.5	0.08	0.11	0.08	0.08	0.11	0	0	0	0.14	B
10	7.27273	4.54545	0.08	0.11	0.08	0.11	0.08	0	0	0	0.05	B
10	7.27273	7.27273	0.08	0.11	0.08	0.11	0.08	0	0	0	0.08	B
10	7.27273	10	0.08	0.11	0.08	0.11	0.08	0	0	0	0.11	B
10	7.27273	12.7273	0.08	0.11	0.08	0.11	0.08	0	0	0	0.14	B
10	5.71429	3.57143	0.08	0.11	0.08	0.14	0.0628571	0	0	0	0.05	B
10	5.71429	5.71429	0.08	0.11	0.08	0.14	0.0628571	0	0	0	0.08	B
10	5.71429	7.85714	0.08	0.11	0.08	0.14	0.0628571	0	0	0	0.11	B
10	5.71429	10	0.08	0.11	0.08	0.14	0.0628571	0	0	0	0.14	B
10	16	7.27273	0.08	0.11	0.11	0.05	0.176	0	0	0	0.05	B
10	16	11.6364	0.08	0.11	0.11	0.05	0.176	0	0	0	0.08	B
10	16	16	0.08	0.11	0.11	0.05	0.176	0	0	0	0.11	B
10	16	20.3636	0.08	0.11	0.11	0.05	0.176	0	0	0	0.14	B
10	10	4.54545	0.08	0.11	0.11	0.08	0.11	0	0	0	0.05	B
10	10	7.27273	0.08	0.11	0.11	0.08	0.11	0	0	0	0.08	B
10	10	10	0.08	0.11	0.11	0.08	0.11	0	0	0	0.11	B
10	10	12.7273	0.08	0.11	0.11	0.08	0.11	0	0	0	0.14	B
10	7.27273	3.30579	0.08	0.11	0.11	0.11	0.08	0	0	0	0.05	B
10	7.27273	5.28926	0.08	0.11	0.11	0.11	0.08	0	0	0	0.08	B
10	7.27273	7.27273	0.08	0.11	0.11	0.11	0.08	0	0	0	0.11	B
10	7.27273	9.2562	0.08	0.11	0.11	0.11	0.08	0	0	0	0.14	B
10	5.71429	2.5974	0.08	0.11	0.11	0.14	0.0628571	0	0	0	0.05	B
10	5.71429	4.15584	0.08	0.11	0.11	0.14	0.0628571	0	0	0	0.08	B
10	5.71429	5.71429	0.08	0.11	0.11	0.14	0.0628571	0	0	0	0.11	B
10	5.71429	7.27273	0.08	0.11	0.11	0.14	0.0628571	0	0	0	0.14	B
10	16	5.71429	0.08	0.11	0.14	0.05	0.176	0	0	0	0.05	B
10	16	9.14286	0.08	0.11	0.14	0.05	0.176	0	0	0	0.08	B
10	16	12.5714	0.08	0.11	0.14	0.05	0.176	0	0	0	0.11	B
10	16	16	0.08	0.11	0.14	0.05	0.176	0	0	0	0.14	B
10	10	3.57143	0.08	0.11	0.14	0.08	0.11	0	0	0	0.05	B
10	10	5.71429	0.08	0.11	0.14	0.08	0.11	0	0	0	0.08	B
10	10	7.85714	0.08	0.11	0.14	0.08	0.11	0	0	0	0.11	B
10	10	10	0.08	0.11	0.14	0.08	0.11	0	0	0	0.14	B
10	7.27273	2.5974	0.08	0.11	0.14	0.11	0.08	0	0	0	0.05	B
10	7.27273	4.15584	0.08	0.11	0.14	0.11	0.08	0	0	0	0.08	B
10	7.27273	5.71429	0.08	0.11	0.14	0.11	0.08	0	0	0	0.11	B
10	7.27273	7.27273	0.08	0.11	0.14	0.11	0.08	0	0	0	0.14	B
10	5.71429	2.04082	0.08	0.11	0.14	0.14	0.0628571	0	0	0	0.05	B
10	5.71429	3.26531	0.08	0.11	0.14	0.14	0.0628571	0	0	0	0.08	B
10	5.71429	4.4898	0.08	0.11	0.14	0.14	0.0628571	0	0	0	0.11	B
10	5.71429	5.71429	0.08	0.11	0.14	0.14	0.0628571	0	0	0	0.14	B
10	16	16	0.08	0.14	0.05	0.05	0.224	0	0	0	0.05	B
10	16	25.6	0.08	0.14	0.05	0.05	0.224	0	0	0	0.08	B
10	16	35.2	0.08	0.14	0.05	0.05	0.224	0	0	0	0.11	B
10	16	44.8	0.08	0.14	0.05	0.05	0.224	0	0	0	0.14	B
10	10	10	0.08	0.14	0.05	0.08	0.14	0	0	0	0.05	B
10	10	16	0.08	0.14	0.05	0.08	0.14	0	0	0	0.08	B
10	10	22	0.08	0.14	0.05	0.08	0.14	0	0	0	0.11	B
10	10	28	0.08	0.14	0.05	0.08	0.14	0	0	0	0.14	B
10	7.27273	7.27273	0.08	0.14	0.05	0.11	0.101818	0	0	0	0.05	B
10	7.27273	11.6364	0.08	0.14	0.05	0.11	0.101818	0	0	0	0.08	B
10	7.27273	16	0.08	0.14	0.05	0.11	0.101818	0	0	0	0.11	B
10	7.27273	20.3636	0.08	0.14	0.05	0.11	0.101818	0	0	0	0.14	B
10	5.71429	5.71429	0.08	0.14	0.05	0.14	0.08	0	0	0	0.05	B
10	5.71429	9.14286	0.08	0.14	0.05	0.14	0.08	0	0	0	0.08	B
10	5.71429	12.5714	0.08	0.14	0.05	0.14	0.08	0	0	0	0.11	B
10	5.71429	16	0.08	0.14	0.05	0.14	0.08	0	0	0	0.14	B
10	16	10	0.08	0.14	0.08	0.05	0.224	0	0	0	0.05	B
10	16	16	0.08	0.14	0.08	0.05	0.224	0	0	0	0.08	B
10	16	22	0.08	0.14	0.08	0.05	0.224	0	0	0	0.11	B
10	16	28	0.08	0.14	0.08	0.05	0.224	0	0	0	0.14	B
10	10	6.25	0.08	0.14	0.08	0.08	0.14	0	0	0	0.05	B
10	10	10	0.08	0.14	0.08	0.08	0.14	0	0	0	0.08	B
10	10	13.75	0.08	0.14	0.08	0.08	0.14	0	0	0	0.11	B
10	10	17.5	0.08	0.14	0.08	0.08	0.14	0	0	0	0.14	B
10	7.27273	4.54545	0.08	0.14	0.08	0.11	0.101818	0	0	0	0.05	B
10	7.27273	7.27273	0.08	0.14	0.08	0.11	0.101818	0	0	0	0.08	B
10	7.27273	10	0.08	0.14	0.08	0.11	0.101818	0	0	0	0.11	B
10	7.27273	12.7273	0.08	0.14	0.08	0.11	0.101818	0	0	0	0.14	B
10	5.71429	3.57143	0.08	0.14	0.08	0.14	0.08	0	0	0	0.05	B
10	5.71429	5.71429	0.08	0.14	0.08	0.14	0.08	0	0	0	0.08	B
10	5.71429	7.85714	0.08	0.14	0.08	0.14	0.08	0	0	0	0.11	B
10	5.71429	10	0.08	0.14	0.08	0.14	0.08	0	0	0	0.14	B
10	16	7.27273	0.08	0.14	0.11	0.05	0.224	0	0	0	0.05	B
10	16	11.6364	0.08	0.14	0.11	0.05	0.224	0	0	0	0.08	B
10	16	16	0.08	0.14	0.11	0.05	0.224	0	0	0	0.11	B
10	16	20.3636	0.08	0.14	0.11	0.05	0.224	0	0	0	0.14	B
10	10	4.54545	0.08	0.14	0.11	0.08	0.14	0	0	0	0.05	B
10	10	7.27273	0.08	0.14	0.11	0.08	0.14	0	0	0	0.08	B
10	10	10	0.08	0.14	0.11	0.08	0.14	0	0	0	0.11	B
10	10	12.7273	0.08	0.14	0.11	0.08	0.14	0	0	0	0.14	B
10	7.27273	3.30579	0.08	0.14	0.11	0.11	0.101818	0	0	0	0.05	B
10	7.27273	5.28926	0.08	0.14	0.11	0.11	0.101818	0	0	0	0.08	B
10	7.27273	7.27273	0.08	0.14	0.11	0.11	0.101818	0	0	0	0.11	B
10	7.27273	9.2562	0.08	0.14	0.11	0.11	0.101818	0	0	0	0.14	B
10	5.71429	2.5974	0.08	0.14	0.11	0.14	0.08	0	0	0	0.05	B
10	5.71429	4.15584	0.08	0.14	0.11	0.14	0.08	0	0	0	0.08	B
10	5.71429	5.71429	0.08	0.14	0.11	0.14	0.08	0	0	0	0.11	B
10	5.71429	7.27273	0.08	0.14	0.11	0.14	0.08	0	0	0	0.14	B
10	16	5.71429	0.08	0.14	0.14	0.05	0.224	0	0	0	0.05	B
10	16	9.14286	0.08	0.14	0.14	0.05	0.224	0	0	0	0.08	B
10	16	12.5714	0.08	0.14	0.14	0.05	0.224	0	0	0	0.11	B
10	16	16	0.08	0.14	0.14	0.05	0.224	0	0	0	0.14	B
10	10	3.57143	0.08	0.14	0.14	0.08	0.14	0	0	0	0.05	B
10	10	5.71429	0.08	0.14	0.14	0.08	0.14	0	0	0	0.08	B
10	10	7.85714	0.08	0.14	0.14	0.08	0.14	0	0	0	0.11	B
10	10	10	0.08	0.14	0.14	0.08	0.14	0	0	0	0.14	B
10	7.27273	2.5974	0.08	0.14	0.14	0.11	0.101818	0	0	0	0.05	B
10	7.27273	4.15584	0.08	0.14	0.14	0.11	0.101818	0	0	0	0.08	B
10	7.27273	5.71429	0.08	0.14	0.14	0.11	0.101818	0	0	0	0.11	B
10	7.27273	7.27273	0.08	0.14	0.14	0.11	0.101818	0	0	0	0.14	B
10	5.71429	2.04082	0.08	0.14	0.14	0.14	0.08	0	0	0	0.05	B
10	5.71429	3.26531	0.08	0.14	0.14	0.14	0.08	0	0	0	0.08	B
10	5.71429	4.4898	0.08	0.14	0.14	0.14	0.08	0	0	0	0.11	B
10	5.71429	5.71429	0.08	0.14	0.14	0.14	0.08	0	0	0	0.14	B
10	22	22	0.11	0.05	0.05	0.05	0.11	0	0	0	0.05	B
10	22	35.2	0.11	0.05	0.05	0.05	0.11	0	0	0	0.08	B
10	22	48.4	0.11	0.05	0.05	0.05	0.11	0	0	0	0.11	B
10	22	61.6	0.11	0.05	0.05	0.05	0.11	0	0	0	0.14	B
10	13.75	13.75	0.11	0.05	0.05	0.08	0.06875	0	0	0	0.05	B
10	13.75	22	0.11	0.05	0.05	0.08	0.06875	0	0	0	0.08	B
10	13.75	30.25	0.11	0.05	0.05	0.08	0.06875	0	0	0	0.11	B
10	13.75	38.5	0.11	0.05	0.05	0.08	0.06875	0	0	0	0.14	B
10	10	10	0.11	0.05	0.05	0.11	0.05	0	0	0	0.05	B
10	10	16	0.11	0.05	0.05	0.11	0.05	0	0	0	0.08	B
10	10	22	0.11	0.05	0.05	0.11	0.05	0	0	0	0.11	B
10	10	28	0.11	0.05	0.05	0.11	0.05	0	0	0	0.14	B
10	7.85714	7.85714	0.11	0.05	0.05	0.14	0.0392857	0	0	0	0.05	B
10	7.85714	12.5714	0.11	0.05	0.05	0.14	0.0392857	0	0	0	0.08	B
10	7.85714	17.2857	0.11	0.05	0.05	0.14	0.0392857	0	0	0	0.11	B
10	7.85714	22	0.11	0.05	0.05	0.14	0.0392857	0	0	0	0.14	B
10	22	13.75	0.11	0.05	0.08	0.05	0.11	0	0	0	0.05	B
10	22	22	0.11	0.05	0.08	0.05	0.11	0	0	0	0.08	B
10	22	30.25	0.11	0.05	0.08	0.05	0.11	0	0	0	0.11	B
10	22	38.5	0.11	0.05	0.08	0.05	0.11	0	0	0	0.14	B
10	13.75	8.59375	0.11	0.05	0.08	0.08	0.06875	0	0	0	0.05	B
10	13.75	13.75	0.11	0.05	0.08	0.08	0.06875	0	0	0	0.08	B
10	13.75	18.9062	0.11	0.05	0.08	0.08	0.06875	0	0	0	0.11	B
10	13.75	24.0625	0.11	0.05	0.08	0.08	0.06875	0	0	0	0.14	B
10	10	6.25	0.11	0.05	0.08	0.11	0.05	0	0	0	0.05	B
10	10	10	0.11	0.05	0.08	0.11	0.05	0	0	0	0.08	B
10	10	13.75	0.11	0.05	0.08	0.11	0.05	0	0	0	0.11	B
10	10	17.5	0.11	0.05	0.08	0.11	0.05	0	0	0	0.14	B
10	7.85714	4.91071	0.11	0.05	0.08	0.14	0.0392857	0	0	0	0.05	B
10	7.85714	7.85714	0.11	0.05	0.08	0.14	0.0392857	0	0	0	0.08	B
10	7.85714	10.8036	0.11	0.05	0.08	0.14	0.0392857	0	0	0	0.11	B
10	7.85714	13.75	0.11	0.05	0.08	0.14	0.0392857	0	0	0	0.14	B
10	22	10	0.11	0.05	0.11	0.05	0.11	0	0	0	0.05	B
10	22	16	0.11	0.05	0.11	0.05	0.11	0	0	0	0.08	B
10	22	22	0.11	0.05	0.11	0.05	0.11	0	0	0	0.11	B
10	22	28	0.11	0.05	0.11	0.05	0.11	0	0	0	0.14	B
10	13.75	6.25	0.11	0.05	0.11	0.08	0.06875	0	0	0	0.05	B
10	13.75	10	0.11	0.05	0.11	0.08	0.06875	0	0	0	0.08	B
10	13.75	13.75	0.11	0.05	0.11	0.08	0.06875	0	0	0	0.11	B
10	13.75	17.5	0.11	0.05	0.11	0.08	0.06875	0	0	0	0.14	B
10	10	4.54545	0.11	0.05	0.11	0.11	0.05	0	0	0	0.05	B
10	10	7.27273	0.11	0.05	0.11	0.11	0.05	0	0	0	0.08	B
10	10	10	0.11	0.05	0.11	0.11	0.05	0	0	0	0.11	B
10	10	12.7273	0.11	0.05	0.11	0.11	0.05	0	0	0	0.14	B
10	7.85714	3.57143	0.11	0.05	0.11	0.14	0.0392857	0	0	0	0.05	B
10	7.85714	5.71429	0.11	0.05	0.11	0.14	0.0392857	0	0	0	0.08	B
10	7.85714	7.85714	0.11	0.05	0.11	0.14	0.0392857	0	0	0	0.11	B
10	7.85714	10	0.11	0.05	0.11	0.14	0.0392857	0	0	0	0.14	B
10	22	7.85714	0.11	0.05	0.14	0.05	0.11	0	0	0	0.05	B
10	22	12.5714	0.11	0.05	0.14	0.05	0.11	0	0	0	0.08	B
10	22	17.2857	0.11	0.05	0.14	0.05	0.11	0	0	0	0.11	B
10	22	22	0.11	0.05	0.14	0.05	0.11	0	0	0	0.14	B
10	13.75	4.91071	0.11	0.05	0.14	0.08	0.06875	0	0	0	0.05	B
10	13.75	7.85714	0.11	0.05	0.14	0.08	0.06875	0	0	0	0.08	B
10	13.75	10.8036	0.11	0.05	0.14	0.08	0.06875	0	0	0	0.11	B
10	13.75	13.75	0.11	0.05	0.14	0.08	0.06875	0	0	0	0.14	B
10	10	3.57143	0.11	0.05	0.14	0.11	0.05	0	0	0	0.05	B
10	10	5.71429	0.11	0.05	0.14	0.11	0.05	0	0	0	0.08	B
10	10	7.85714	0.11	0.05	0.14	0.11	0.05	0	0	0	0.11	B
10	10	10	0.11	0.05	0.14	0.11	0.05	0	0	0	0.14	B
10	7.85714	2.80612	0.11	0.05	0.14	0.14	0.0392857	0	0	0	0.05	B
10	7.85714	4.4898	0.11	0.05	0.14	0.14	0.0392857	0	0	0	0.08	B
10	7.85714	6.17347	0.11	0.05	0.14	0.14	0.0392857	0	0	0	0.11	B
10	7.85714	7.85714	0.11	0.05	0.14	0.14	0.0392857	0	0	0	0.14	B
10	22	22	0.11	0.08	0.05	0.05	0.176	0	0	0	0.05	B
10	22	35.2	0.11	0.08	0.05	0.05	0.176	0	0	0	0.08	B
10	22	48.4	0.11	0.08	0.05	0.05	0.176	0	0	0	0.11	B
10	22	61.6	0.11	0.08	0.05	0.05	0.176	0	0	0	0.14	B
10	13.75	13.75	0.11	0.08	0.05	0.08	0.11	0	0	0	0.05	B
10	13.75	22	0.11	0.08	0.05	0.08	0.11	0	0	0	0.08	B
10	13.75	30.25	0.11	0.08	0.05	0.08	0.11	0	0	0	0.11	B
10	13.75	38.5	0.11	0.08	0.05	0.08	0.11	0	0	0	0.14	B
10	10	10	0.11	0.08	0.05	0.11	0.08	0	0	0	0.05	B
10	10	16	0.11	0.08	0.05	0.11	0.08	0	0	0	0.08	B
10	10	22	0.11	0.08	0.05	0.11	0.08	0	0	0	0.11	B
10	10	28	0.11	0.08	0.05	0.11	0.08	0	0	0	0.14	B
10	7.85714	7.85714	0.11	0.08	0.05	0.14	0.0628571	0	0	0	0.05	B
10	7.85714	12.5714	0.11	0.08	0.05	0.14	0.0628571	0	0	0	0.08	B
10	7.85714	17.2857	0.11	0.08	0.05	0.14	0.0628571	0	0	0	0.11	B
10	7.85714	22	0.11	0.08	0.05	0.14	0.0628571	0	0	0	0.14	B
10	22	13.75	0.11	0.08	0.08	0.05	0.176	0	0	0	0.05	B
10	22	22	0.11	0.08	0.08	0.05	0.176	0	0	0	0.08	B
10	22	30.25	0.11	0.08	0.08	0.05	0.176	0	0	0	0.11	B
10	22	38.5	0.11	0.08	0.08	0.05	0.176	0	0	0	0.14	B
10	13.75	8.59375	0.11	0.08	0.08	0.08	0.11	0	0	0	0.05	B
10	13.75	13.75	0.11	0.08	0.08	0.08	0.11	0	0	0	0.08	B
10	13.75	18.9062	0.11	0.08	0.08	0.08	0.11	0	0	0	0.11	B
10	13.75	24.0625	0.11	0.08	0.08	0.08	0.11	0	0	0	0.14	B
10	10	6.25	0.11	0.08	0.08	0.11	0.08	0	0	0	0.05	B
10	10	10	0.11	0.08	0.08	0.11	0.08	0	0	0	0.08	B
10	10	13.75	0.11	0.08	0.08	0.11	0.08	0	0	0	0.11	B
10	10	17.5	0.11	0.08	0.08	0.11	0.08	0	0	0	0.14	B
10	7.85714	4.91071	0.11	0.08	0.08	0.14	0.0628571	0	0	0	0.05	B
10	7.85714	7.85714	0.11	0.08	0.08	0.14	0.0628571	0	0	0	0.08	B
10	7.85714	10.8036	0.11	0.08	0.08	0.14	0.0628571	0	0	0	0.11	B
10	7.85714	13.75	0.11	0.08	0.08	0.14	0.0628571	0	0	0	0.14	B
10	22	10	0.11	0.08	0.11	0.05	0.176	0	0	0	0.05	B
10	22	16	0.11	0.08	0.11	0.05	0.176	0	0	0	0.08	B
10	22	22	0.11	0.08	0.11	0.05	0.176	0	0	0	0.11	B
10	22	28	0.11	0.08	0.11	0.05	0.176	0	0	0	0.14	B
10	13.75	6.25	0.11	0.08	0.11	0.08	0.11	0	0	0	0.05	B
10	13.75	10	0.11	0.08	0.11	0.08	0.11	0	0	0	0.08	B
10	13.75	13.75	0.11	0.08	0.11	0.08	0.11	0	0	0	0.11	B
10	13.75	17.5	0.11	0.08	0.11	0.08	0.11	0	0	0	0.14	B
10	10	4.54545	0.11	0.08	0.11	0.11	0.08	0	0	0	0.05	B
10	10	7.27273	0.11	0.08	0.11	0.11	0.08	0	0	0	0.08	B
10	10	10	0.11	0.08	0.11	0.11	0.08	0	0	0	0.11	B
10	10	12.7273	0.11	0.08	0.11	0.11	0.08	0	0	0	0.14	B
10	7.85714	3.57143	0.11	0.08	0.11	0.14	0.0628571	0	0	0	0.05	B
10	7.85714	5.71429	0.11	0.08	0.11	0.14	0.0628571	0	0	0	0.08	B
10	7.85714	7.85714	0.11	0.08	0.11	0.14	0.0628571	0	0	0	0.11	B
10	7.85714	10	0.11	0.08	0.11	0.14	0.0628571	0	0	0	0.14	B
10	22	7.85714	0.11	0.08	0.14	0.05	0.176	0	0	0	0.05	B
10	22	12.5714	0.11	0.08	0.14	0.05	0.176	0	0	0	0.08	B
10	22	17.2857	0.11	0.08	0.14	0.05	0.176	0	0	0	0.11	B
10	22	22	0.11	0.08	0.14	0.05	0.176	0	0	0	0.14	B
10	13.75	4.91071	0.11	0.08	0.14	0.08	0.11	0	0	0	0.05	B
10	13.75	7.85714	0.11	0.08	0.14	0.08	0.11	0	0	0	0.08	B
10	13.75	10.8036	0.11	0.08	0.14	0.08	0.11	0	0	0	0.11	B
10	13.75	13.75	0.11	0.08	0.14	0.08	0.11	0	0	0	0.14	B
10	10	3.57143	0.11	0.08	0.14	0.11	0.08	0	0	0	0.05	B
10	10	5.71429	0.11	0.08	0.14	0.11	0.08	0	0	0	0.08	B
10	10	7.85714	0.11	0.08	0.14	0.11	0.08	0	0	0	0.11	B
10	10	10	0.11	0.08	0.14	0.11	0.08	0	0	0	0.14	B
10	7.85714	2.80612	0.11	0.08	0.14	0.14	0.0628571	0	0	0	0.05	B
10	7.85714	4.4898	0.11	0.08	0.14	0.14	0.0628571	0	0	0	0.08	B
10	7.85714	6.17347	0.11	0.08	0.14	0.14	0.0628571	0	0	0	0.11	B
10	7.85714	7.85714	0.11	0.08	0.14	0.14	0.0628571	0	0	0	0.14	B
10	22	22	0.11	0.11	0.05	0.05	0.242	0	0	0	0.05	B
10	22	35.2	0.11	0.11	0.05	0.05	0.242	0	0	0	0.08	B
10	22	48.4	0.11	0.11	0.05	0.05	0.242	0	0	0	0.11	B
10	22	61.6	0.11	0.11	0.05	0.05	0.242	0	0	0	0.14	B
10	13.75	13.75	0.11	0.11	0.05	0.08	0.15125	0	0	0	0.05	B
10	13.75	22	0.11	0.11	0.05	0.08	0.15125	0	0	0	0.08	B
10	13.75	30.25	0.11	0.11	0.05	0.08	0.15125	0	0	0	0.11	B
10	13.75	38.5	0.11	0.11	0.05	0.08	0.15125	0	0	0	0.14	B
10	10	10	0.11	0.11	0.05	0.11	0.11	0	0	0	0.05	B
10	10	16	0.11	0.11	0.05	0.11	0.11	0	0	0	0.08	B
10	10	22	0.11	0.11	0.05	0.11	0.11	0	0	0	0.11	B
10	10	28	0.11	0.11	0.05	0.11	0.11	0	0	0	0.14	B
10	7.85714	7.85714	0.11	0.11	0.05	0.14	0.0864286	0	0	0	0.05	B
10	7.85714	12.5714	0.11	0.11	0.05	0.14	0.0864286	0	0	0	0.08	B
10	7.85714	17.2857	0.11	0.11	0.05	0.14	0.0864286	0	0	0	0.11	B
10	7.85714	22	0.11	0.11	0.05	0.14	0.0864286	0	0	0	0.14	B
10	22	13.75	0.11	0.11	0.08	0.05	0.242	0	0	0	0.05	B
10	22	22	0.11	0.11	0.08	0.05	0.242	0	0	0	0.08	B
10	22	30.25	0.11	0.11	0.08	0.05	0.242	0	0	0	0.11	B
10	22	38.5	0.11	0.11	0.08	0.05	0.242	0	0	0	0.14	B
10	13.75	8.59375	0.11	0.11	0.08	0.08	0.15125	0	0	0	0.05	B
10	13.75	13.75	0.11	0.11	0.08	0.08	0.15125	0	0	0	0.08	B
10	13.75	18.9062	0.11	0.11	0.08	0.08	0.15125	0	0	0	0.11	B
10	13.75	24.0625	0.11	0.11	0.08	0.08	0.15125	0	0	0	0.14	B
10	10	6.25	0.11	0.11	0.08	0.11	0.11	0	0	0	0.05	B
10	10	10	0.11	0.11	0.08	0.11	0.11	0	0	0	0.08	B
10	10	13.75	0.11	0.11	0.08	0.11	0.11	0	0	0	0.11	B
10	10	17.5	0.11	0.11	0.08	0.11	0.11	0	0	0	0.14	B
10	7.85714	4.91071	0.11	0.11	0.08	0.14	0.0864286	0	0	0	0.05	B
10	7.85714	7.85714	0.11	0.11	0.08	0.14	0.0864286	0	0	0	0.08	B
10	7.85714	10.8036	0.11	0.11	0.08	0.14	0.0864286	0	0	0	0.11	B
10	7.85714	13.75	0.11	0.11	0.08	0.14	0.0864286	0	0	0	0.14	B
10	22	10	0.11	0.11	0.11	0.05	0.242	0	0	0	0.05	B
10	22	16	0.11	0.11	0.11	0.05	0.242	0	0	0	0.08	B
10	22	22	0.11	0.11	0.11	0.05	0.242	0	0	0	0.11	B
10	22	28	0.11	0.11	0.11	0.05	0.242	0	0	0	0.14	B
10	13.75	6.25	0.11	0.11	0.11	0.08	0.15125	0	0	0	0.05	B
10	13.75	10	0.11	0.11	0.11	0.08	0.15125	0	0	0	0.08	B
10	13.75	13.75	0.11	0.11	0.11	0.08	0.15125	0	0	0	0.11	B
10	13.75	17.5	0.11	0.11	0.11	0.08	0.15125	0	0	0	0.14	B
10	10	4.54545	0.11	0.11	0.11	0.11	0.11	0	0	0	0.05	B
10	10	7.27273	0.11	0.11	0.11	0.11	0.11	0	0	0	0.08	B
10	10	10	0.11	0.11	0.11	0.11	0.11	0	0	0	0.11	B
10	10	12.7273	0.11	0.11	0.11	0.11	0.11	0	0	0	0.14	B
10	7.85714	3.57143	0.11	0.11	0.11	0.14	0.0864286	0	0	0	0.05	B
10	7.85714	5.71429	0.11	0.11	0.11	0.14	0.0864286	0	0	0	0.08	B
10	7.85714	7.85714	0.11	0.11	0.11	0.14	0.0864286	0	0	0	0.11	B
10	7.85714	10	0.11	0.11	0.11	0.14	0.0864286	0	0	0	0.14	B
10	22	7.85714	0.11	0.11	0.14	0.05	0.242	0	0	0	0.05	B
10	22	12.5714	0.11	0.11	0.14	0.05	0.242	0	0	0	0.08	B
10	22	17.2857	0.11	0.11	0.14	0.05	0.242	0	0	0	0.11	B
10	22	22	0.11	0.11	0.14	0.05	0.242	0	0	0	0.14	B
10	13.75	4.91071	0.11	0.11	0.14	0.08	0.15125	0	0	0	0.05	B
10	13.75	7.85714	0.11	0.11	0.14	0.08	0.15125	0	0	0	0.08	B
10	13.75	10.8036	0.11	0.11	0.14	0.08	0.15125	0	0	0	0.11	B
10	13.75	13.75	0.11	0.11	0.14	0.08	0.15125	0	0	0	0.14	B
10	10	3.57143	0.11	0.11	0.14	0.11	0.11	0	0	0	0.05	B
10	10	5.71429	0.11	0.11	0.14	0.11	0.11	0	0	0	0.08	B
10	10	7.85714	0.11	0.11	0.14	0.11	0.11	0	0	0	0.11	B
10	10	10	0.11	0.11	0.14	0.11	0.11	0	0	0	0.14	B
10	7.85714	2.80612	0.11	0.11	0.14	0.14	0.0864286	0	0	0	0.05	B
10	7.85714	4.4898	0.11	0.11	0.14	0.14	0.0864286	0	0	0	0.08	B
10	7.85714	6.17347	0.11	0.11	0.14	0.14	0.0864286	0	0	0	0.11	B
10	7.85714	7.85714	0.11	0.11	0.14	0.14	0.0864286	0	0	0	0.14	B
10	22	22	0.11	0.14	0.05	0.05	0.308	0	0	0	0.05	B
10	22	35.2	0.11	0.14	0.05	0.05	0.308	0	0	0	0.08	B
10	22	48.4	0.11	0.14	0.05	0.05	0.308	0	0	0	0.11	B
10	22	61.6	0.11	0.14	0.05	0.05	0.308	0	0	0	0.14	B
10	13.75	13.75	0.11	0.14	0.05	0.08	0.1925	0	0	0	0.05	B
10	13.75	22	0.11	0.14	0.05	0.08	0.1925	0	0	0	0.08	B
10	13.75	30.25	0.11	0.14	0.05	0.08	0.1925	0	0	0	0.11	B
10	13.75	38.5	0.11	0.14	0.05	0.08	0.1925	0	0	0	0.14	B
10	10	10	0.11	0.14	0.05	0.11	0.14	0	0	0	0.05	B
10	10	16	0.11	0.14	0.05	0.11	0.14	0	0	0	0.08	B
10	10	22	0.11	0.14	0.05	0.11	0.14	0	0	0	0.11	B
10	10	28	0.11	0.14	0.05	0.11	0.14	0	0	0	0.14	B
10	7.85714	7.85714	0.11	0.14	0.05	0.14	0.11	0	0	0	0.05	B
10	7.85714	12.5714	0.11	0.14	0.05	0.14	0.11	0	0	0	0.08	B
10	7.85714	17.2857	0.11	0.14	0.05	0.14	0.11	0	0	0	0.11	B
10	7.85714	22	0.11	0.14	0.05	0.14	0.11	0	0	0	0.14	B
10	22	13.75	0.11	0.14	0.08	0.05	0.308	0	0	0	0.05	B
10	22	22	0.11	0.14	0.08	0.05	0.308	0	0	0	0.08	B
10	22	30.25	0.11	0.14	0.08	0.05	0.308	0	0	0	0.11	B
10	22	38.5	0.11	0.14	0.08	0.05	0.308	0	0	0	0.14	B
10	13.75	8.59375	0.11	0.14	0.08	0.08	0.1925	0	0	0	0.05	B
10	13.75	13.75	0.11	0.14	0.08	0.08	0.1925	0	0	0	0.08	B
10	13.75	18.9062	0.11	0.14	0.08	0.08	0.1925	0	0	0	0.11	B
10	13.75	24.0625	0.11	0.14	0.08	0.08	0.1925	0	0	0	0.14	B
10	10	6.25	0.11	0.14	0.08	0.11	0.14	0	0	0	0.05	B
10	10	10	0.11	0.14	0.08	0.11	0.14	0	0	0	0.08	B
10	10	13.75	0.11	0.14	0.08	0.11	0.14	0	0	0	0.11	B
10	10	17.5	0.11	0.14	0.08	0.11	0.14	0	0	0	0.14	B
10	7.85714	4.91071	0.11	0.14	0.08	0.14	0.11	0	0	0	0.05	B
10	7.85714	7.85714	0.11	0.14	0.08	0.14	0.11	0	0	0	0.08	B
10	7.85714	10.8036	0.11	0.14	0.08	0.14	0.11	0	0	0	0.11	B
10	7.85714	13.75	0.11	0.14	0.08	0.14	0.11	0	0	0	0.14	B
10	22	10	0.11	0.14	0.11	0.05	0.308	0	0	0	0.05	B
10	22	16	0.11	0.14	0.11	0.05	0.308	0	0	0	0.08	B
10	22	22	0.11	0.14	0.11	0.05	0.308	0	0	0	0.11	B
10	22	28	0.11	0.14	0.11	0.05	0.308	0	0	0	0.14	B
10	13.75	6.25	0.11	0.14	0.11	0.08	0.1925	0	0	0	0.05	B
10	13.75	10	0.11	0.14	0.11	0.08	0.1925	0	0	0	0.08	B
10	13.75	13.75	0.11	0.14	0.11	0.08	0.1925	0	0	0	0.11	B
10	13.75	17.5	0.11	0.14	0.11	0.08	0.1925	0	0	0	0.14	B
10	10	4.54545	0.11	0.14	0.11	0.11	0.14	0	0	0	0.05	B
10	10	7.27273	0.11	0.14	0.11	0.11	0.14	0	0	0	0.08	B
10	10	10	0.11	0.14	0.11	0.11	0.14	0	0	0	0.11	B
10	10	12.7273	0.11	0.14	0.11	0.11	0.14	0	0	0	0.14	B
10	7.85714	3.57143	0.11	0.14	0.11	0.14	0.11	0	0	0	0.05	B
10	7.85714	5.71429	0.11	0.14	0.11	0.14	0.11	0	0	0	0.08	B
10	7.85714	7.85714	0.11	0.14	0.11	0.14	0.11	0	0	0	0.11	B
10	7.85714	10	0.11	0.14	0.11	0.14	0.11	0	0	0	0.14	B
10	22	7.85714	0.11	0.14	0.14	0.05	0.308	0	0	0	0.05	B
10	22	12.5714	0.11	0.14	0.14	0.05	0.308	0	0	0	0.08	B
10	22	17.2857	0.11	0.14	0.14	0.05	0.308	0	0	0	0.11	B
10	22	22	0.11	0.14	0.14	0.05	0.308	0	0	0	0.14	B
10	13.75	4.91071	0.11	0.14	0.14	0.08	0.1925	0	0	0	0.05	B
10	13.75	7.85714	0.11	0.14	0.14	0.08	0.1925	0	0	0	0.08	B
10	13.75	10.8036	0.11	0.14	0.14	0.08	0.1925	0	0	0	0.11	B
10	13.75	13.75	0.11	0.14	0.14	0.08	0.1925	0	0	0	0.14	B
10	10	3.57143	0.11	0.14	0.14	0.11	0.14	0	0	0	0.05	B
10	10	5.71429	0.11	0.14	0.14	0.11	0.14	0	0	0	0.08	B
10	10	7.85714	0.11	0.14	0.14	0.11	0.14	0	0	0	0.11	B
10	10	10	0.11	0.14	0.14	0.11	0.14	0	0	0	0.14	B
10	7.85714	2.80612	0.11	0.14	0.14	0.14	0.11	0	0	0	0.05	B
10	7.85714	4.4898	0.11	0.14	0.14	0.14	0.11	0	0	0	0.08	B
10	7.85714	6.17347	0.11	0.14	0.14	0.14	0.11	0	0	0	0.11	B
10	7.85714	7.85714	0.11	0.14	0.14	0.14	0.11	0	0	0	0.14	B
10	28	28	0.14	0.05	0.05	0.05	0.14	0	0	0	0.05	B
10	28	44.8	0.14	0.05	0.05	0.05	0.14	0	0	0	0.08	B
10	28	61.6	0.14	0.05	0.05	0.05	0.14	0	0	0	0.11	B
10	28	78.4	0.14	0.05	0.05	0.05	0.14	0	0	0	0.14	B
10	17.5	17.5	0.14	0.05	0.05	0.08	0.0875	0	0	0	0.05	B
10	17.5	28	0.14	0.05	0.05	0.08	0.0875	0	0	0	0.08	B
10	17.5	38.5	0.14	0.05	0.05	0.08	0.0875	0	0	0	0.11	B
10	17.5	49	0.14	0.05	0.05	0.08	0.0875	0	0	0	0.14	B
10	12.7273	12.7273	0.14	0.05	0.05	0.11	0.0636364	0	0	0	0.05	B
10	12.7273	20.3636	0.14	0.05	0.05	0.11	0.0636364	0	0	0	0.08	B
10	12.7273	28	0.14	0.05	0.05	0.11	0.0636364	0	0	0	0.11	B
10	12.7273	35.6364	0.14	0.05	0.05	0.11	0.0636364	0	0	0	0.14	B
10	10	10	0.14	0.05	0.05	0.14	0.05	0	0	0	0.05	B
10	10	16	0.14	0.05	0.05	0.14	0.05	0	0	0	0.08	B
10	10	22	0.14	0.05	0.05	0.14	0.05	0	0	0	0.11	B
10	10	28	0.14	0.05	0.05	0.14	0.05	0	0	0	0.14	B
10	28	17.5	0.14	0.05	0.08	0.05	0.14	0	0	0	0.05	B
10	28	28	0.14	0.05	0.08	0.05	0.14	0	0	0	0.08	B
10	28	38.5	0.14	0.05	0.08	0.05	0.14	0	0	0	0.11	B
10	28	49	0.14	0.05	0.08	0.05	0.14	0	0	0	0.14	B
10	17.5	10.9375	0.14	0.05	0.08	0.08	0.0875	0	0	0	0.05	B
10	17.5	17.5	0.14	0.05	0.08	0.08	0.0875	0	0	0	0.08	B
10	17.5	24.0625	0.14	0.05	0.08	0.08	0.0875	0	0	0	0.11	B
10	17.5	30.625	0.14	0.05	0.08	0.08	0.0875	0	0	0	0.14	B
10	12.7273	7.95455	0.14	0.05	0.08	0.11	0.0636364	0	0	0	0.05	B
10	12.7273	12.7273	0.14	0.05	0.08	0.11	0.0636364	0	0	0	0.08	B
10	12.7273	17.5	0.14	0.05	0.08	0.11	0.0636364	0	0	0	0.11	B
10	12.7273	22.2727	0.14	0.05	0.08	0.11	0.0636364	0	0	0	0.14	B
10	10	6.25	0.14	0.05	0.08	0.14	0.05	0	0	0	0.05	B
10	10	10	0.14	0.05	0.08	0.14	0.05	0	0	0	0.08	B
10	10	13.75	0.14	0.05	0.08	0.14	0.05	0	0	0	0.11	B
10	10	17.5	0.14	0.05	0.08	0.14	0.05	0	0	0	0.14	B
10	28	12.7273	0.14	0.05	0.11	0.05	0.14	0	0	0	0.05	B
10	28	20.3636	0.14	0.05	0.11	0.05	0.14	0	0	0	0.08	B
10	28	28	0.14	0.05	0.11	0.05	0.14	0	0	0	0.11	B
10	28	35.6364	0.14	0.05	0.11	0.05	0.14	0	0	0	0.14	B
10	17.5	7.95455	0.14	0.05	0.11	0.08	0.0875	0	0	0	0.05	B
10	17.5	12.7273	0.14	0.05	0.11	0.08	0.0875	0	0	0	0.08	B
10	17.5	17.5	0.14	0.05	0.11	0.08	0.0875	0	0	0	0.11	B
10	17.5	22.2727	0.14	0.05	0.11	0.08	0.0875	0	0	0	0.14	B
10	12.7273	5.78512	0.14	0.05	0.11	0.11	0.0636364	0	0	0	0.05	B
10	12.7273	9.2562	0.14	0.05	0.11	0.11	0.0636364	0	0	0	0.08	B
10	12.7273	12.7273	0.14	0.05	0.11	0.11	0.0636364	0	0	0	0.11	B
10	12.7273	16.1983	0.14	0.05	0.11	0.11	0.0636364	0	0	0	0.14	B
10	10	4.54545	0.14	0.05	0.11	0.14	0.05	0	0	0	0.05	B
10	10	7.27273	0.14	0.05	0.11	0.14	0.05	0	0	0	0.08	B
10	10	10	0.14	0.05	0.11	0.14	0.05	0	0	0	0.11	B
10	10	12.7273	0.14	0.05	0.11	0.14	0.05	0	0	0	0.14	B
10	28	10	0.14	0.05	0.14	0.05	0.14	0	0	0	0.05	B
10	28	16	0.14	0.05	0.14	0.05	0.14	0	0	0	0.08	B
10	28	22	0.14	0.05	0.14	0.05	0.14	0	0	0	0.11	B
10	28	28	0.14	0.05	0.14	0.05	0.14	0	0	0	0.14	B
10	17.5	6.25	0.14	0.05	0.14	0.08	0.0875	0	0	0	0.05	B
10	17.5	10	0.14	0.05	0.14	0.08	0.0875	0	0	0	0.08	B
10	17.5	13.75	0.14	0.05	0.14	0.08	0.0875	0	0	0	0.11	B
10	17.5	17.5	0.14	0.05	0.14	0.08	0.0875	0	0	0	0.14	B
10	12.7273	4.54545	0.14	0.05	0.14	0.11	0.0636364	0	0	0	0.05	B
10	12.7273	7.27273	0.14	0.05	0.14	0.11	0.0636364	0	0	0	0.08	B
10	12.7273	10	0.14	0.05	0.14	0.11	0.0636364	0	0	0	0.11	B
10	12.7273	12.7273	0.14	0.05	0.14	0.11	0.0636364	0	0	0	0.14	B
10	10	3.57143	0.14	0.05	0.14	0.14	0.05	0	0	0	0.05	B
10	10	5.71429	0.14	0.05	0.14	0.14	0.05	0	0	0	0.08	B
10	10	7.85714	0.14	0.05	0.14	0.14	0.05	0	0	0	0.11	B
10	10	10	0.14	0.05	0.14	0.14	0.05	0	0	0	0.14	B
10	28	28	0.14	0.08	0.05	0.05	0.224	0	0	0	0.05	B
10	28	44.8	0.14	0.08	0.05	0.05	0.224	0	0	0	0.08	B
10	28	61.6	0.14	0.08	0.05	0.05	0.224	0	0	0	0.11	B
10	28	78.4	0.14	0.08	0.05	0.05	0.224	0	0	0	0.14	B
10	17.5	17.5	0.14	0.08	0.05	0.08	0.14	0	0	0	0.05	B
10	17.5	28	0.14	0.08	0.05	0.08	0.14	0	0	0	0.08	B
10	17.5	38.5	0.14	0.08	0.05	0.08	0.14	0	0	0	0.11	B
10	17.5	49	0.14	0.08	0.05	0.08	0.14	0	0	0	0.14	B
10	12.7273	12.7273	0.14	0.08	0.05	0.11	0.101818	0	0	0	0.05	B
10	12.7273	20.3636	0.14	0.08	0.05	0.11	0.101818	0	0	0	0.08	B
10	12.7273	28	0.14	0.08	0.05	0.11	0.101818	0	0	0	0.11	B
10	12.7273	35.6364	0.14	0.08	0.05	0.11	0.101818	0	0	0	0.14	B
10	10	10	0.14	0.08	0.05	0.14	0.08	0	0	0	0.05	B
10	10	16	0.14	0.08	0.05	0.14	0.08	0	0	0	0.08	B
10	10	22	0.14	0.08	0.05	0.14	0.08	0	0	0	0.11	B
10	10	28	0.14	0.08	0.05	0.14	0.08	0	0	0	0.14	B
10	28	17.5	0.14	0.08	0.08	0.05	0.224	0	0	0	0.05	B
10	28	28	0.14	0.08	0.08	0.05	0.224	0	0	0	0.08	B
10	28	38.5	0.14	0.08	0.08	0.05	0.224	0	0	0	0.11	B
10	28	49	0.14	0.08	0.08	0.05	0.224	0	0	0	0.14	B
10	17.5	10.9375	0.14	0.08	0.08	0.08	0.14	0	0	0	0.05	B
10	17.5	17.5	0.14	0.08	0.08	0.08	0.14	0	0	0	0.08	B
10	17.5	24.0625	0.14	0.08	0.08	0.08	0.14	0	0	0	0.11	B
10	17.5	30.625	0.14	0.08	0.08	0.08	0.14	0	0	0	0.14	B
10	12.7273	7.95455	0.14	0.08	0.08	0.11	0.101818	0	0	0	0.05	B
10	12.7273	12.7273	0.14	0.08	0.08	0.11	0.101818	0	0	0	0.08	B
10	12.7273	17.5	0.14	0.08	0.08	0.11	0.101818	0	0	0	0.11	B
10	12.7273	22.2727	0.14	0.08	0.08	0.11	0.101818	0	0	0	0.14	B
10	10	6.25	0.14	0.08	0.08	0.14	0.08	0	0	0	0.05	B
10	10	10	0.14	0.08	0.08	0.14	0.08	0	0	0	0.08	B
10	10	13.75	0.14	0.08	0.08	0.14	0.08	0	0	0	0.11	B
10	10	17.5	0.14	0.08	0.08	0.14	0.08	0	0	0	0.14	B
10	28	12.7273	0.14	0.08	0.11	0.05	0.224	0	0	0	0.05	B
10	28	20.3636	0.14	0.08	0.11	0.05	0.224	0	0	0	0.08	B
10	28	28	0.14	0.08	0.11	0.05	0.224	0	0	0	0.11	B
10	28	35.6364	0.14	0.08	0.11	0.05	0.224	0	0	0	0.14	B
10	17.5	7.95455	0.14	0.08	0.11	0.08	0.14	0	0	0	0.05	B
10	17.5	12.7273	0.14	0.08	0.11	0.08	0.14	0	0	0	0.08	B
10	17.5	17.5	0.14	0.08	0.11	0.08	0.14	0	0	0	0.11	B
10	17.5	22.2727	0.14	0.08	0.11	0.08	0.14	0	0	0	0.14	B
10	12.7273	5.78512	0.14	0.08	0.11	0.11	0.101818	0	0	0	0.05	B
10	12.7273	9.2562	0.14	0.08	0.11	0.11	0.101818	0	0	0	0.08	B
10	12.7273	12.7273	0.14	0.08	0.11	0.11	0.101818	0	0	0	0.11	B
10	12.7273	16.1983	0.14	0.08	0.11	0.11	0.101818	0	0	0	0.14	B
10	10	4.54545	0.14	0.08	0.11	0.14	0.08	0	0	0	0.05	B
10	10	7.27273	0.14	0.08	0.11	0.14	0.08	0	0	0	0.08	B
10	10	10	0.14	0.08	0.11	0.14	0.08	0	0	0	0.11	B
10	10	12.7273	0.14	0.08	0.11	0.14	0.08	0	0	0	0.14	B
10	28	10	0.14	0.08	0.14	0.05	0.224	0	0	0	0.05	B
10	28	16	0.14	0.08	0.14	0.05	0.224	0	0	0	0.08	B
10	28	22	0.14	0.08	0.14	0.05	0.224	0	0	0	0.11	B
10	28	28	0.14	0.08	0.14	0.05	0.224	0	0	0	0.14	B
10	17.5	6.25	0.14	0.08	0.14	0.08	0.14	0	0	0	0.05	B
10	17.5	10	0.14	0.08	0.14	0.08	0.14	0	0	0	0.08	B
10	17.5	13.75	0.14	0.08	0.14	0.08	0.14	0	0	0	0.11	B
10	17.5	17.5	0.14	0.08	0.14	0.08	0.14	0	0	0	0.14	B
10	12.7273	4.54545	0.14	0.08	0.14	0.11	0.101818	0	0	0	0.05	B
10	12.7273	7.27273	0.14	0.08	0.14	0.11	0.101818	0	0	0	0.08	B
10	12.7273	10	0.14	0.08	0.14	0.11	0.101818	0	0	0	0.11	B
10	12.7273	12.7273	0.14	0.08	0.14	0.11	0.101818	0	0	0	0.14	B
10	10	3.57143	0.14	0.08	0.14	0.14	0.08	0	0	0	0.05	B
10	10	5.71429	0.14	0.08	0.14	0.14	0.08	0	0	0	0.08	B
10	10	7.85714	0.14	0.08	0.14	0.14	0.08	0	0	0	0.11	B
10	10	10	0.14	0.08	0.14	0.14	0.08	0	0	0	0.14	B
10	28	28	0.14	0.11	0.05	0.05	0.308	0	0	0	0.05	B
10	28	44.8	0.14	0.11	0.05	0.05	0.308	0	0	0	0.08	B
10	28	61.6	0.14	0.11	0.05	0.05	0.308	0	0	0	0.11	B
10	28	78.4	0.14	0.11	0.05	0.05	0.308	0	0	0	0.14	B
10	17.5	17.5	0.14	0.11	0.05	0.08	0.1925	0	0	0	0.05	B
10	17.5	28	0.14	0.11	0.05	0.08	0.1925	0	0	0	0.08	B
10	17.5	38.5	0.14	0.11	0.05	0.08	0.1925	0	0	0	0.11	B
10	17.5	49	0.14	0.11	0.05	0.08	0.1925	0	0	0	0.14	B
10	12.7273	12.7273	0.14	0.11	0.05	0.11	0.14	0	0	0	0.05	B
10	12.7273	20.3636	0.14	0.11	0.05	0.11	0.14	0	0	0	0.08	B
10	12.7273	28	0.14	0.11	0.05	0.11	0.14	0	0	0	0.11	B
10	12.7273	35.6364	0.14	0.11	0.05	0.11	0.14	0	0	0	0.14	B
10	10	10	0.14	0.11	0.05	0.14	0.11	0	0	0	0.05	B
10	10	16	0.14	0.11	0.05	0.14	0.11	0	0	0	0.08	B
10	10	22	0.14	0.11	0.05	0.14	0.11	0	0	0	0.11	B
10	10	28	0.14	0.11	0.05	0.14	0.11	0	0	0	0.14	B
10	28	17.5	0.14	0.11	0.08	0.05	0.308	0	0	0	0.05	B
10	28	28	0.14	0.11	0.08	0.05	0.308	0	0	0	0.08	B
10	28	38.5	0.14	0.11	0.08	0.05	0.308	0	0	0	0.11	B
10	28	49	0.14	0.11	0.08	0.05	0.308	0	0	0	0.14	B
10	17.5	10.9375	0.14	0.11	0.08	0.08	0.1925	0	0	0	0.05	B
10	17.5	17.5	0.14	0.11	0.08	0.08	0.1925	0	0	0	0.08	B
10	17.5	24.0625	0.14	0.11	0.08	0.08	0.1925	0	0	0	0.11	B
10	17.5	30.625	0.14	0.11	0.08	0.08	0.1925	0	0	0	0.14	B
10	12.7273	7.95455	0.14	0.11	0.08	0.11	0.14	0	0	0	0.05	B
10	12.7273	12.7273	0.14	0.11	0.08	0.11	0.14	0	0	0	0.08	B
10	12.7273	17.5	0.14	0.11	0.08	0.11	0.14	0	0	0	0.11	B
10	12.7273	22.2727	0.14	0.11	0.08	0.11	0.14	0	0	0	0.14	B
10	10	6.25	0.14	0.11	0.08	0.14	0.11	0	0	0	0.05	B
10	10	10	0.14	0.11	0.08	0.14	0.11	0	0	0	0.08	B
10	10	13.75	0.14	0.11	0.08	0.14	0.11	0	0	0	0.11	B
10	10	17.5	0.14	0.11	0.08	0.14	0.11	0	0	0	0.14	B
10	28	12.7273	0.14	0.11	0.11	0.05	0.308	0	0	0	0.05	B
10	28	20.3636	0.14	0.11	0.11	0.05	0.308	0	0	0	0.08	B
10	28	28	0.14	0.11	0.11	0.05	0.308	0	0	0	0.11	B
10	28	35.6364	0.14	0.11	0.11	0.05	0.308	0	0	0	0.14	B
10	17.5	7.95455	0.14	0.11	0.11	0.08	0.1925	0	0	0	0.05	B
10	17.5	12.7273	0.14	0.11	0.11	0.08	0.1925	0	0	0	0.08	B
10	17.5	17.5	0.14	0.11	0.11	0.08	0.1925	0	0	0	0.11	B
10	17.5	22.2727	0.14	0.11	0.11	0.08	0.1925	0	0	0	0.14	B
10	12.7273	5.78512	0.14	0.11	0.11	0.11	0.14	0	0	0	0.05	B
10	12.7273	9.2562	0.14	0.11	0.11	0.11	0.14	0	0	0	0.08	B
10	12.7273	12.7273	0.14	0.11	0.11	0.11	0.14	0	0	0	0.11	B
10	12.7273	16.1983	0.14	0.11	0.11	0.11	0.14	0	0	0	0.14	B
10	10	4.54545	0.14	0.11	0.11	0.14	0.11	0	0	0	0.05	B
10	10	7.27273	0.14	0.11	0.11	0.14	0.11	0	0	0	0.08	B
10	10	10	0.14	0.11	0.11	0.14	0.11	0	0	0	0.11	B
10	10	12.7273	0.14	0.11	0.11	0.14	0.11	0	0	0	0.14	B
10	28	10	0.14	0.11	0.14	0.05	0.308	0	0	0	0.05	B
10	28	16	0.14	0.11	0.14	0.05	0.308	0	0	0	0.08	B
10	28	22	0.14	0.11	0.14	0.05	0.308	0	0	0	0.11	B
10	28	28	0.14	0.11	0.14	0.05	0.308	0	0	0	0.14	B
10	17.5	6.25	0.14	0.11	0.14	0.08	0.1925	0	0	0	0.05	B
10	17.5	10	0.14	0.11	0.14	0.08	0.1925	0	0	0	0.08	B
10	17.5	13.75	0.14	0.11	0.14	0.08	0.1925	0	0	0	0.11	B
10	17.5	17.5	0.14	0.11	0.14	0.08	0.1925	0	0	0	0.14	B
10	12.7273	4.54545	0.14	0.11	0.14	0.11	0.14	0	0	0	0.05	B
10	12.7273	7.27273	0.14	0.11	0.14	0.11	0.14	0	0	0	0.08	B
10	12.7273	10	0.14	0.11	0.14	0.11	0.14	0	0	0	0.11	B
10	12.7273	12.7273	0.14	0.11	0.14	0.11	0.14	0	0	0	0.14	B
10	10	3.57143	0.14	0.11	0.14	0.14	0.11	0	0	0	0.05	B
10	10	5.71429	0.14	0.11	0.14	0.14	0.11	0	0	0	0.08	B
10	10	7.85714	0.14	0.11	0.14	0.14	0.11	0	0	0	0.11	B
10	10	10	0.14	0.11	0.14	0.14	0.11	0	0	0	0.14	B
10	28	28	0.14	0.14	0.05	0.05	0.392	0	0	0	0.05	B
10	28	44.8	0.14	0.14	0.05	0.05	0.392	0	0	0	0.08	B
10	28	61.6	0.14	0.14	0.05	0.05	0.392	0	0	0	0.11	B
10	28	78.4	0.14	0.14	0.05	0.05	0.392	0	0	0	0.14	B
10	17.5	17.5	0.14	0.14	0.05	0.08	0.245	0	0	0	0.05	B
10	17.5	28	0.14	0.14	0.05	0.08	0.245	0	0	0	0.08	B
10	17.5	38.5	0.14	0.14	0.05	0.08	0.245	0	0	0	0.11	B
10	17.5	49	0.14	0.14	0.05	0.08	0.245	0	0	0	0.14	B
10	12.7273	12.7273	0.14	0.14	0.05	0.11	0.178182	0	0	0	0.05	B
10	12.7273	20.3636	0.14	0.14	0.05	0.11	0.178182	0	0	0	0.08	B
10	12.7273	28	0.14	0.14	0.05	0.11	0.178182	0	0	0	0.11	B
10	12.7273	35.6364	0.14	0.14	0.05	0.11	0.178182	0	0	0	0.14	B
10	10	10	0.14	0.14	0.05	0.14	0.14	0	0	0	0.05	B
10	10	16	0.14	0.14	0.05	0.14	0.14	0	0	0	0.08	B
10	10	22	0.14	0.14	0.05	0.14	0.14	0	0	0	0.11	B
10	10	28	0.14	0.14	0.05	0.14	0.14	0	0	0	0.14	B
10	28	17.5	0.14	0.14	0.08	0.05	0.392	0	0	0	0.05	B
10	28	28	0.14	0.14	0.08	0.05	0.392	0	0	0	0.08	B
10	28	38.5	0.14	0.14	0.08	0.05	0.392	0	0	0	0.11	B
10	28	49	0.14	0.14	0.08	0.05	0.392	0	0	0	0.14	B
10	17.5	10.9375	0.14	0.14	0.08	0.08	0.245	0	0	0	0.05	B
10	17.5	17.5	0.14	0.14	0.08	0.08	0.245	0	0	0	0.08	B
10	17.5	24.0625	0.14	0.14	0.08	0.08	0.245	0	0	0	0.11	B
10	17.5	30.625	0.14	0.14	0.08	0.08	0.245	0	0	0	0.14	B
10	12.7273	7.95455	0.14	0.14	0.08	0.11	0.178182	0	0	0	0.05	B
10	12.7273	12.7273	0.14	0.14	0.08	0.11	0.178182	0	0	0	0.08	B
10	12.7273	17.5	0.14	0.14	0.08	0.11	0.178182	0	0	0	0.11	B
10	12.7273	22.2727	0.14	0.14	0.08	0.11	0.178182	0	0	0	0.14	B
10	10	6.25	0.14	0.14	0.08	0.14	0.14	0	0	0	0.05	B
10	10	10	0.14	0.14	0.08	0.14	0.14	0	0	0	0.08	B
10	10	13.75	0.14	0.14	0.08	0.14	0.14	0	0	0	0.11	B
10	10	17.5	0.14	0.14	0.08	0.14	0.14	0	0	0	0.14	B
10	28	12.7273	0.14	0.14	0.11	0.05	0.392	0	0	0	0.05	B
10	28	20.3636	0.14	0.14	0.11	0.05	0.392	0	0	0	0.08	B
10	28	28	0.14	0.14	0.11	0.05	0.392	0	0	0	0.11	B
10	28	35.6364	0.14	0.14	0.11	0.05	0.392	0	0	0	0.14	B
10	17.5	7.95455	0.14	0.14	0.11	0.08	0.245	0	0	0	0.05	B
10	17.5	12.7273	0.14	0.14	0.11	0.08	0.245	0	0	0	0.08	B
10	17.5	17.5	0.14	0.14	0.11	0.08	0.245	0	0	0	0.11	B
10	17.5	22.2727	0.14	0.14	0.11	0.08	0.245	0	0	0	0.14	B
10	12.7273	5.78512	0.14	0.14	0.11	0.11	0.178182	0	0	0	0.05	B
10	12.7273	9.2562	0.14	0.14	0.11	0.11	0.178182	0	0	0	0.08	B
10	12.7273	12.7273	0.14	0.14	0.11	0.11	0.178182	0	0	0	0.11	B
10	12.7273	16.1983	0.14	0.14	0.11	0.11	0.178182	0	0	0	0.14	B
10	10	4.54545	0.14	0.14	0.11	0.14	0.14	0	0	0	0.05	B
10	10	7.27273	0.14	0.14	0.11	0.14	0.14	0	0	0	0.08	B
10	10	10	0.14	0.14	0.11	0.14	0.14	0	0	0	0.11	B
10	10	12.7273	0.14	0.14	0.11	0.14	0.14	0	0	0	0.14	B
10	28	10	0.14	0.14	0.14	0.05	0.392	0	0	0	0.05	B
10	28	16	0.14	0.14	0.14	0.05	0.392	0	0	0	0.08	B
10	28	22	0.14	0.14	0.14	0.05	0.392	0	0	0	0.11	B
10	28	28	0.14	0.14	0.14	0.05	0.392	0	0	0	0.14	B
10	17.5	6.25	0.14	0.14	0.14	0.08	0.245	0	0	0	0.05	B
10	17.5	10	0.14	0.14	0.14	0.08	0.245	0	0	0	0.08	B
10	17.5	13.75	0.14	0.14	0.14	0.08	0.245	0	0	0	0.11	B
10	17.5	17.5	0.14	0.14	0.14	0.08	0.245	0	0	0	0.14	B
10	12.7273	4.54545	0.14	0.14	0.14	0.11	0.178182	0	0	0	0.05	B
10	12.7273	7.27273	0.14	0.14	0.14	0.11	0.178182	0	0	0	0.08	B
10	12.7273	10	0.14	0.14	0.14	0.11	0.178182	0	0	0	0.11	B
10	12.7273	12.7273	0.14	0.14	0.14	0.11	0.178182	0	0	0	0.14	B
10	10	3.57143	0.14	0.14	0.14	0.14	0.14	0	0	0	0.05	B
10	10	5.71429	0.14	0.14	0.14	0.14	0.14	0	0	0	0.08	B
10	10	7.85714	0.14	0.14	0.14	0.14	0.14	0	0	0	0.11	B
10	10	10	0.14	0.14	0.14	0.14	0.14	0	0	0	0.14	B
10	10	10	0.05	0.05	0.05	0.05	0	0	0.05	0.05	0	C
10	10	16	0.05	0.05	0.05	0.05	0	0	0.08	0.03125	0	C
10	10	22	0.05	0.05	0.05	0.05	0	0	0.11	0.0227273	0	C
10	10	28	0.05	0.05	0.05	0.05	0	0	0.14	0.0178571	0	C
10	6.25	10	0.05	0.05	0.05	0.08	0	0	0.05	0.03125	0	C
10	6.25	16	0.05	0.05	0.05	0.08	0	0	0.08	0.0195312	0	C
10	6.25	22	0.05	0.05	0.05	0.08	0	0	0.11	0.0142045	0	C
10	6.25	28	0.05	0.05	0.05	0.08	0	0	0.14	0.0111607	0	C
10	4.54545	10	0.05	0.05	0.05	0.11	0	0	0.05	0.0227273	0	C
10	4.54545	16	0.05	0.05	0.05	0.11	0	0	0.08	0.0142045	0	C
10	4.54545	22	0.05	0.05	0.05	0.11	0	0	0.11	0.0103306	0	C
10	4.54545	28	0.05	0.05	0.05	0.11	0	0	0.14	0.00811688	0	C
10	3.57143	10	0.05	0.05	0.05	0.14	0	0	0.05	0.0178571	0	C
10	3.57143	16	0.05	0.05	0.05	0.14	0	0	0.08	0.0111607	0	C
10	3.57143	22	0.05	0.05	0.05	0.14	0	0	0.11	0.00811688	0	C
10	3.57143	28	0.05	0.05	0.05	0.14	0	0	0.14	0.00637755	0	C
10	10	6.25	0.05	0.05	0.08	0.05	0	0	0.05	0.08	0	C
10	10	10	0.05	0.05	0.08	0.05	0	0	0.08	0.05	0	C
10	10	13.75	0.05	0.05	0.08	0.05	0	0	0.11	0.0363636	0	C
10	10	17.5	0.05	0.05	0.08	0.05	0	0	0.14	0.0285714	0	C
10	6.25	6.25	0.05	0.05	0.08	0.08	0	0	0.05	0.05	0	C
10	6.25	10	0.05	0.05	0.08	0.08	0	0	0.08	0.03125	0	C
10	6.25	13.75	0.05	0.05	0.08	0.08	0	0	0.11	0.0227273	0	C
10	6.25	17.5	0.05	0.05	0.08	0.08	0	0	0.14	0.0178571	0	C
10	4.54545	6.25	0.05	0.05	0.08	0.11	0	0	0.05	0.0363636	0	C
10	4.54545	10	0.05	0.05	0.08	0.11	0	0	0.08	0.0227273	0	C
10	4.54545	13.75	0.05	0.05	0.08	0.11	0	0	0.11	0.0165289	0	C
10	4.54545	17.5	0.05	0.05	0.08	0.11	0	0	0.14	0.012987	0	C
10	3.57143	6.25	0.05	0.05	0.08	0.14	0	0	0.05	0.0285714	0	C
10	3.57143	10	0.05	0.05	0.08	0.14	0	0	0.08	0.0178571	0	C
10	3.57143	13.75	0.05	0.05	0.08	0.14	0	0	0.11	0.012987	0	C
10	3.57143	17.5	0.05	0.05	0.08	0.14	0	0	0.14	0.0102041	0	C
10	10	4.54545	0.05	0.05	0.11	0.05	0	0	0.05	0.11	0	C
10	10	7.27273	0.05	0.05	0.11	0.05	0	0	0.08	0.06875	0	C
10	10	10	0.05	0.05	0.11	0.05	0	0	0.11	0.05	0	C
10	10	12.7273	0.05	0.05	0.11	0.05	0	0	0.14	0.0392857	0	C
10	6.25	4.54545	0.05	0.05	0.11	0.08	0	0	0.05	0.06875	0	C
10	6.25	7.27273	0.05	0.05	0.11	0.08	0	0	0.08	0.0429688	0	C
10	6.25	10	0.05	0.05	0.11	0.08	0	0	0.11	0.03125	0	C
10	6.25	12.7273	0.05	0.05	0.11	0.08	0	0	0.14	0.0245536	0	C
10	4.54545	4.54545	0.05	0.05	0.11	0.11	0	0	0.05	0.05	0	C
10	4.54545	7.27273	0.05	0.05	0.11	0.11	0	0	0.08	0.03125	0	C
10	4.54545	10	0.05	0.05	0.11	0.11	0	0	0.11	0.0227273	0	C
10	4.54545	12.7273	0.05	0.05	0.11	0.11	0	0	0.14	0.0178571	0	C
10	3.57143	4.54545	0.05	0.05	0.11	0.14	0	0	0.05	0.0392857	0	C
10	3.57143	7.27273	0.05	0.05	0.11	0.14	0	0	0.08	0.0245536	0	C
10	3.57143	10	0.05	0.05	0.11	0.14	0	0	0.11	0.0178571	0	C
10	3.57143	12.7273	0.05	0.05	0.11	0.14	0	0	0.14	0.0140306	0	C
10	10	3.57143	0.05	0.05	0.14	0.05	0	0	0.05	0.14	0	C
10	10	5.71429	0.05	0.05	0.14	0.05	0	0	0.08	0.0875	0	C
10	10	7.85714	0.05	0.05	0.14	0.05	0	0	0.11	0.0636364	0	C
10	10	10	0.05	0.05	0.14	0.05	0	0	0.14	0.05	0	C
10	6.25	3.57143	0.05	0.05	0.14	0.08	0	0	0.05	0.0875	0	C
10	6.25	5.71429	0.05	0.05	0.14	0.08	0	0	0.08	0.0546875	0	C
10	6.25	7.85714	0.05	0.05	0.14	0.08	0	0	0.11	0.0397727	0	C
10	6.25	10	0.05	0.05	0.14	0.08	0	0	0.14	0.03125	0	C
10	4.54545	3.57143	0.05	0.05	0.14	0.11	0	0	0.05	0.0636364	0	C
10	4.54545	5.71429	0.05	0.05	0.14	0.11	0	0	0.08	0.0397727	0	C
10	4.54545	7.85714	0.05	0.05	0.14	0.11	0	0	0.11	0.0289256	0	C
10	4.54545	10	0.05	0.05	0.14	0.11	0	0	0.14	0.0227273	0	C
10	3.57143	3.57143	0.05	0.05	0.14	0.14	0	0	0.05	0.05	0	C
10	3.57143	5.71429	0.05	0.05	0.14	0.14	0	0	0.08	0.03125	0	C
10	3.57143	7.85714	0.05	0.05	0.14	0.14	0	0	0.11	0.0227273	0	C
10	3.57143	10	0.05	0.05	0.14	0.14	0	0	0.14	0.0178571	0	C
10	10	10	0.05	0.08	0.05	0.05	0	0	0.05	0.08	0	C
10	10	16	0.05	0.08	0.05	0.05	0	0	0.08	0.05	0	C
10	10	22	0.05	0.08	0.05	0.05	0	0	0.11	0.0363636	0	C
10	10	28	0.05	0.08	0.05	0.05	0	0	0.14	0.0285714	0	C
10	6.25	10	0.05	0.08	0.05	0.08	0	0	0.05	0.05	0	C
10	6.25	16	0.05	0.08	0.05	0.08	0	0	0.08	0.03125	0	C
10	6.25	22	0.05	0.08	0.05	0.08	0	0	0.11	0.0227273	0	C
10	6.25	28	0.05	0.08	0.05	0.08	0	0	0.14	0.0178571	0	C
10	4.54545	10	0.05	0.08	0.05	0.11	0	0	0.05	0.0363636	0	C
10	4.54545	16	0.05	0.08	0.05	0.11	0	0	0.08	0.0227273	0	C
10	4.54545	22	0.05	0.08	0.05	0.11	0	0	0.11	0.0165289	0	C
10	4.54545	28	0.05	0.08	0.05	0.11	0	0	0.14	0.012987	0	C
10	3.57143	10	0.05	0.08	0.05	0.14	0	0	0.05	0.0285714	0	C
10	3.57143	16	0.05	0.08	0.05	0.14	0	0	0.08	0.0178571	0	C
10	3.57143	22	0.05	0.08	0.05	0.14	0	0	0.11	0.012987	0	C
10	3.57143	28	0.05	0.08	0.05	0.14	0	0	0.14	0.0102041	0	C
10	10	6.25	0.05	0.08	0.08	0.05	0	0	0.05	0.128	0	C
10	10	10	0.05	0.08	0.08	0.05	0	0	0.08	0.08	0	C
10	10	13.75	0.05	0.08	0.08	0.05	0	0	0.11	0.0581818	0	C
10	10	17.5	0.05	0.08	0.08	0.05	0	0	0.14	0.0457143	0	C
10	6.25	6.25	0.05	0.08	0.08	0.08	0	0	0.05	0.08	0	C
10	6.25	10	0.05	0.08	0.08	0.08	0	0	0.08	0.05	0	C
10	6.25	13.75	0.05	0.08	0.08	0.08	0	0	0.11	0.0363636	0	C
10	6.25	17.5	0.05	0.08	0.08	0.08	0	0	0.14	0.0285714	0	C
10	4.54545	6.25	0.05	0.08	0.08	0.11	0	0	0.05	0.0581818	0	C
10	4.54545	10	0.05	0.08	0.08	0.11	0	0	0.08	0.0363636	0	C
10	4.54545	13.75	0.05	0.08	0.08	0.11	0	0	0.11	0.0264463	0	C
10	4.54545	17.5	0.05	0.08	0.08	0.11	0	0	0.14	0.0207792	0	C
10	3.57143	6.25	0.05	0.08	0.08	0.14	0	0	0.05	0.0457143	0	C
10	3.57143	10	0.05	0.08	0.08	0.14	0	0	0.08	0.0285714	0	C
10	3.57143	13.75	0.05	0.08	0.08	0.14	0	0	0.11	0.0207792	0	C
10	3.57143	17.5	0.05	0.08	0.08	0.14	0	0	0.14	0.0163265	0	C
10	10	4.54545	0.05	0.08	0.11	0.05	0	0	0.05	0.176	0	C
10	10	7.27273	0.05	0.08	0.11	0.05	0	0	0.08	0.11	0	C
10	10	10	0.05	0.08	0.11	0.05	0	0	0.11	0.08	0	C
10	10	12.7273	0.05	0.08	0.11	0.05	0	0	0.14	0.0628571	0	C
10	6.25	4.54545	0.05	0.08	0.11	0.08	0	0	0.05	0.11	0	C
10	6.25	7.27273	0.05	0.08	0.11	0.08	0	0	0.08	0.06875	0	C
10	6.25	10	0.05	0.08	0.11	0.08	0	0	0.11	0.05	0	C
10	6.25	12.7273	0.05	0.08	0.11	0.08	0	0	0.14	0.0392857	0	C
10	4.54545	4.54545	0.05	0.08	0.11	0.11	0	0	0.05	0.08	0	C
10	4.54545	7.27273	0.05	0.08	0.11	0.11	0	0	0.08	0.05	0	C
10	4.54545	10	0.05	0.08	0.11	0.11	0	0	0.11	0.0363636	0	C
10	4.54545	12.7273	0.05	0.08	0.11	0.11	0	0	0.14	0.0285714	0	C
10	3.57143	4.54545	0.05	0.08	0.11	0.14	0	0	0.05	0.0628571	0	C
10	3.57143	7.27273	0.05	0.08	0.11	0.14	0	0	0.08	0.0392857	0	C
10	3.57143	10	0.05	0.08	0.11	0.14	0	0	0.11	0.0285714	0	C
10	3.57143	12.7273	0.05	0.08	0.11	0.14	0	0	0.14	0.022449	0	C
10	10	3.57143	0.05	0.08	0.14	0.05	0	0	0.05	0.224	0	C
10	10	5.71429	0.05	0.08	0.14	0.05	0	0	0.08	0.14	0	C
10	10	7.85714	0.05	0.08	0.14	0.05	0	0	0.11	0.101818	0	C
10	10	10	0.05	0.08	0.14	0.05	0	0	0.14	0.08	0	C
10	6.25	3.57143	0.05	0.08	0.14	0.08	0	0	0.05	0.14	0	C
10	6.25	5.71429	0.05	0.08	0.14	0.08	0	0	0.08	0.0875	0	C
10	6.25	7.85714	0.05	0.08	0.14	0.08	0	0	0.11	0.0636364	0	C
10	6.25	10	0.05	0.08	0.14	0.08	0	0	0.14	0.05	0	C
10	4.54545	3.57143	0.05	0.08	0.14	0.11	0	0	0.05	0.101818	0	C
10	4.54545	5.71429	0.05	0.08	0.14	0.11	0	0	0.08	0.0636364	0	C
10	4.54545	7.85714	0.05	0.08	0.14	0.11	0	0	0.11	0.046281	0	C
10	4.54545	10	0.05	0.08	0.14	0.11	0	0	0.14	0.0363636	0	C
10	3.57143	3.57143	0.05	0.08	0.14	0.14	0	0	0.05	0.08	0	C
10	3.57143	5.71429	0.05	0.08	0.14	0.14	0	0	0.08	0.05	0	C
10	3.57143	7.85714	0.05	0.08	0.14	0.14	0	0	0.11	0.0363636	0	C
10	3.57143	10	0.05	0.08	0.14	0.14	0	0	0.14	0.0285714	0	C
10	10	10	0.05	0.11	0.05	0.05	0	0	0.05	0.11	0	C
10	10	16	0.05	0.11	0.05	0.05	0	0	0.08	0.06875	0	C
10	10	22	0.05	0.11	0.05	0.05	0	0	0.11	0.05	0	C
10	10	28	0.05	0.11	0.05	0.05	0	0	0.14	0.0392857	0	C
10	6.25	10	0.05	0.11	0.05	0.08	0	0	0.05	0.06875	0	C
10	6.25	16	0.05	0.11	0.05	0.08	0	0	0.08	0.0429688	0	C
10	6.25	22	0.05	0.11	0.05	0.08	0	0	0.11	0.03125	0	C
10	6.25	28	0.05	0.11	0.05	0.08	0	0	0.14	0.0245536	0	C
10	4.54545	10	0.05	0.11	0.05	0.11	0	0	0.05	0.05	0	C
10	4.54545	16	0.05	0.11	0.05	0.11	0	0	0.08	0.03125	0	C
10	4.54545	22	0.05	0.11	0.05	0.11	0	0	0.11	0.0227273	0	C
10	4.54545	28	0.05	0.11	0.05	0.11	0	0	0.14	0.0178571	0	C
10	3.57143	10	0.05	0.11	0.05	0.14	0	0	0.05	0.0392857	0	C
10	3.57143	16	0.05	0.11	0.05	0.14	0	0	0.08	0.0245536	0	C
10	3.57143	22	0.05	0.11	0.05	0.14	0	0	0.11	0.0178571	0	C
10	3.57143	28	0.05	0.11	0.05	0.14	0	0	0.14	0.0140306	0	C
10	10	6.25	0.05	0.11	0.08	0.05	0	0	0.05	0.176	0	C
10	10	10	0.05	0.11	0.08	0.05	0	0	0.08	0.11	0	C
10	10	13.75	0.05	0.11	0.08	0.05	0	0	0.11	0.08	0	C
10	10	17.5	0.05	0.11	0.08	0.05	0	0	0.14	0.0628571	0	C
10	6.25	6.25	0.05	0.11	0.08	0.08	0	0	0.05	0.11	0	C
10	6.25	10	0.05	0.11	0.08	0.08	0	0	0.08	0.06875	0	C
10	6.25	13.75	0.05	0.11	0.08	0.08	0	0	0.11	0.05	0	C
10	6.25	17.5	0.05	0.11	0.08	0.08	0	0	0.14	0.0392857	0	C
10	4.54545	6.25	0.05	0.11	0.08	0.11	0	0	0.05	0.08	0	C
10	4.54545	10	0.05	0.11	0.08	0.11	0	0	0.08	0.05	0	C
10	4.54545	13.75	0.05	0.11	0.08	0.11	0	0	0.11	0.0363636	0	C
10	4.54545	17.5	0.05	0.11	0.08	0.11	0	0	0.14	0.0285714	0	C
10	3.57143	6.25	0.05	0.11	0.08	0.14	0	0	0.05	0.0628571	0	C
10	3.57143	10	0.05	0.11	0.08	0.14	0	0	0.08	0.0392857	0	C
10	3.57143	13.75	0.05	0.11	0.08	0.14	0	0	0.11	0.0285714	0	C
10	3.57143	17.5	0.05	0.11	0.08	0.14	0	0	0.14	0.022449	0	C
10	10	4.54545	0.05	0.11	0.11	0.05	0	0	0.05	0.242	0	C
10	10	7.27273	0.05	0.11	0.11	0.05	0	0	0.08	0.15125	0	C
10	10	10	0.05	0.11	0.11	0.05	0	0	0.11	0.11	0	C
10	10	12.7273	0.05	0.11	0.11	0.05	0	0	0.14	0.0864286	0	C
10	6.25	4.54545	0.05	0.11	0.11	0.08	0	0	0.05	0.15125	0	C
10	6.25	7.27273	0.05	0.11	0.11	0.08	0	0	0.08	0.0945312	0	C
10	6.25	10	0.05	0.11	0.11	0.08	0	0	0.11	0.06875	0	C
10	6.25	12.7273	0.05	0.11	0.11	0.08	0	0	0.14	0.0540179	0	C
10	4.54545	4.54545	0.05	0.11	0.11	0.11	0	0	0.05	0.11	0	C
10	4.54545	7.27273	0.05	0.11	0.11	0.11	0	0	0.08	0.06875	0	C
10	4.54545	10	0.05	0.11	0.11	0.11	0	0	0.11	0.05	0	C
10	4.54545	12.7273	0.05	0.11	0.11	0.11	0	0	0.14	0.0392857	0	C
10	3.57143	4.54545	0.05	0.11	0.11	0.14	0	0	0.05	0.0864286	0	C
10	3.57143	7.27273	0.05	0.11	0.11	0.14	0	0	0.08	0.0540179	0	C
10	3.57143	10	0.05	0.11	0.11	0.14	0	0	0.11	0.0392857	0	C
10	3.57143	12.7273	0.05	0.11	0.11	0.14	0	0	0.14	0.0308673	0	C
10	10	3.57143	0.05	0.11	0.14	0.05	0	0	0.05	0.308	0	C
10	10	5.71429	0.05	0.11	0.14	0.05	0	0	0.08	0.1925	0	C
10	10	7.85714	0.05	0.11	0.14	0.05	0	0	0.11	0.14	0	C
10	10	10	0.05	0.11	0.14	0.05	0	0	0.14	0.11	0	C
10	6.25	3.57143	0.05	0.11	0.14	0.08	0	0	0.05	0.1925	0	C
10	6.25	5.71429	0.05	0.11	0.14	0.08	0	0	0.08	0.120313	0	C
10	6.25	7.85714	0.05	0.11	0.14	0.08	0	0	0.11	0.0875	0	C
10	6.25	10	0.05	0.11	0.14	0.08	0	0	0.14	0.06875	0	C
10	4.54545	3.57143	0.05	0.11	0.14	0.11	0	0	0.05	0.14	0	C
10	4.54545	5.71429	0.05	0.11	0.14	0.11	0	0	0.08	0.0875	0	C
10	4.54545	7.85714	0.05	0.11	0.14	0.11	0	0	0.11	0.0636364	0	C
10	4.54545	10	0.05	0.11	0.14	0.11	0	0	0.14	0.05	0	C
10	3.57143	3.57143	0.05	0.11	0.14	0.14	0	0	0.05	0.11	0	C
10	3.57143	5.71429	0.05	0.11	0.14	0.14	0	0	0.08	0.06875	0	C
10	3.57143	7.85714	0.05	0.11	0.14	0.14	0	0	0.11	0.05	0	C
10	3.57143	10	0.05	0.11	0.14	0.14	0	0	0.14	0.0392857	0	C
10	10	10	0.05	0.14	0.05	0.05	0	0	0.05	0.14	0	C
10	10	16	0.05	0.14	0.05	0.05	0	0	0.08	0.0875	0	C
10	10	22	0.05	0.14	0.05	0.05	0	0	0.11	0.0636364	0	C
10	10	28	0.05	0.14	0.05	0.05	0	0	0.14	0.05	0	C
10	6.25	10	0.05	0.14	0.05	0.08	0	0	0.05	0.0875	0	C
10	6.25	16	0.05	0.14	0.05	0.08	0	0	0.08	0.0546875	0	C
10	6.25	22	0.05	0.14	0.05	0.08	0	0	0.11	0.0397727	0	C
10	6.25	28	0.05	0.14	0.05	0.08	0	0	0.14	0.03125	0	C
10	4.54545	10	0.05	0.14	0.05	0.11	0	0	0.05	0.0636364	0	C
10	4.54545	16	0.05	0.14	0.05	0.11	0	0	0.08	0.0397727	0	C
10	4.54545	22	0.05	0.14	0.05	0.11	0	0	0.11	0.0289256	0	C
10	4.54545	28	0.05	0.14	0.05	0.11	0	0	0.14	0.0227273	0	C
10	3.57143	10	0.05	0.14	0.05	0.14	0	0	0.05	0.05	0	C
10	3.57143	16	0.05	0.14	0.05	0.14	0	0	0.08	0.03125	0	C
10	3.57143	22	0.05	0.14	0.05	0.14	0	0	0.11	0.0227273	0	C
10	3.57143	28	0.05	0.14	0.05	0.14	0	0	0.14	0.0178571	0	C
10	10	6.25	0.05	0.14	0.08	0.05	0	0	0.05	0.224	0	C
10	10	10	0.05	0.14	0.08	0.05	0	0	0.08	0.14	0	C
10	10	13.75	0.05	0.14	0.08	0.05	0	0	0.11	0.101818	0	C
10	10	17.5	0.05	0.14	0.08	0.05	0	0	0.14	0.08	0	C
10	6.25	6.25	0.05	0.14	0.08	0.08	0	0	0.05	0.14	0	C
10	6.25	10	0.05	0.14	0.08	0.08	0	0	0.08	0.0875	0	C
10	6.25	13.75	0.05	0.14	0.08	0.08	0	0	0.11	0.0636364	0	C
10	6.25	17.5	0.05	0.14	0.08	0.08	0	0	0.14	0.05	0	C
10	4.54545	6.25	0.05	0.14	0.08	0.11	0	0	0.05	0.101818	0	C
10	4.54545	10	0.05	0.14	0.08	0.11	0	0	0.08	0.0636364	0	C
10	4.54545	13.75	0.05	0.14	0.08	0.11	0	0	0.11	0.046281	0	C
10	4.54545	17.5	0.05	0.14	0.08	0.11	0	0	0.14	0.0363636	0	C
10	3.57143	6.25	0.05	0.14	0.08	0.14	0	0	0.05	0.08	0	C
10	3.57143	10	0.05	0.14	0.08	0.14	0	0	0.08	0.05	0	C
10	3.57143	13.75	0.05	0.14	0.08	0.14	0	0	0.11	0.0363636	0	C
10	3.57143	17.5	0.05	0.14	0.08	0.14	0	0	0.14	0.0285714	0	C
10	10	4.54545	0.05	0.14	0.11	0.05	0	0	0.05	0.308	0	C
10	10	7.27273	0.05	0.14	0.11	0.05	0	0	0.08	0.1925	0	C
10	10	10	0.05	0.14	0.11	0.05	0	0	0.11	0.14	0	C
10	10	12.7273	0.05	0.14	0.11	0.05	0	0	0.14	0.11	0	C
10	6.25	4.54545	0.05	0.14	0.11	0.08	0	0	0.05	0.1925	0	C
10	6.25	7.27273	0.05	0.14	0.11	0.08	0	0	0.08	0.120313	0	C
10	6.25	10	0.05	0.14	0.11	0.08	0	0	0.11	0.0875	0	C
10	6.25	12.7273	0.05	0.14	0.11	0.08	0	0	0.14	0.06875	0	C
10	4.54545	4.54545	0.05	0.14	0.11	0.11	0	0	0.05	0.14	0	C
10	4.54545	7.27273	0.05	0.14	0.11	0.11	0	0	0.08	0.0875	0	C
10	4.54545	10	0.05	0.14	0.11	0.11	0	0	0.11	0.0636364	0	C
10	4.54545	12.7273	0.05	0.14	0.11	0.11	0	0	0.14	0.05	0	C
10	3.57143	4.54545	0.05	0.14	0.11	0.14	0	0	0.05	0.11	0	C
10	3.57143	7.27273	0.05	0.14	0.11	0.14	0	0	0.08	0.06875	0	C
10	3.57143	10	0.05	0.14	0.11	0.14	0	0	0.11	0.05	0	C
10	3.57143	12.7273	0.05	0.14	0.11	0.14	0	0	0.14	0.0392857	0	C
10	10	3.57143	0.05	0.14	0.14	0.05	0	0	0.05	0.392	0	C
10	10	5.71429	0.05	0.14	0.14	0.05	0	0	0.08	0.245	0	C
10	10	7.85714	0.05	0.14	0.14	0.05	0	0	0.11	0.178182	0	C
10	10	10	0.05	0.14	0.14	0.05	0	0	0.14	0.14	0	C
10	6.25	3.57143	0.05	0.14	0.14	0.08	0	0	0.05	0.245	0	C
10	6.25	5.71429	0.05	0.14	0.14	0.08	0	0	0.08	0.153125	0	C
10	6.25	7.85714	0.05	0.14	0.14	0.08	0	0	0.11	0.111364	0	C
10	6.25	10	0.05	0.14	0.14	0.08	0	0	0.14	0.0875	0	C
10	4.54545	3.57143	0.05	0.14	0.14	0.11	0	0	0.05	0.178182	0	C
10	4.54545	5.71429	0.05	0.14	0.14	0.11	0	0	0.08	0.111364	0	C
10	4.54545	7.85714	0.05	0.14	0.14	0.11	0	0	0.11	0.0809917	0	C
10	4.54545	10	0.05	0.14	0.14	0.11	0	0	0.14	0.0636364	0	C
10	3.57143	3.57143	0.05	0.14	0.14	0.14	0	0	0.05	0.14	0	C
10	3.57143	5.71429	0.05	0.14	0.14	0.14	0	0	0.08	0.0875	0	C
10	3.57143	7.85714	0.05	0.14	0.14	0.14	0	0	0.11	0.0636364	0	C
10	3.57143	10	0.05	0.14	0.14	0.14	0	0	0.14	0.05	0	C
10	16	10	0.08	0.05	0.05	0.05	0	0	0.05	0.08	0	C
10	16	16	0.08	0.05	0.05	0.05	0	0	0.08	0.05	0	C
10	16	22	0.08	0.05	0.05	0.05	0	0	0.11	0.0363636	0	C
10	16	28	0.08	0.05	0.05	0.05	0	0	0.14	0.0285714	0	C
10	10	10	0.08	0.05	0.05	0.08	0	0	0.05	0.05	0	C
10	10	16	0.08	0.05	0.05	0.08	0	0	0.08	0.03125	0	C
10	10	22	0.08	0.05	0.05	0.08	0	0	0.11	0.0227273	0	C
10	10	28	0.08	0.05	0.05	0.08	0	0	0.14	0.0178571	0	C
10	7.27273	10	0.08	0.05	0.05	0.11	0	0	0.05	0.0363636	0	C
10	7.27273	16	0.08	0.05	0.05	0.11	0	0	0.08	0.0227273	0	C
10	7.27273	22	0.08	0.05	0.05	0.11	0	0	0.11	0.0165289	0	C
10	7.27273	28	0.08	0.05	0.05	0.11	0	0	0.14	0.012987	0	C
10	5.71429	10	0.08	0.05	0.05	0.14	0	0	0.05	0.0285714	0	C
10	5.71429	16	0.08	0.05	0.05	0.14	0	0	0.08	0.0178571	0	C
10	5.71429	22	0.08	0.05	0.05	0.14	0	0	0.11	0.012987	0	C
10	5.71429	28	0.08	0.05	0.05	0.14	0	0	0.14	0.0102041	0	C
10	16	6.25	0.08	0.05	0.08	0.05	0	0	0.05	0.128	0	C
10	16	10	0.08	0.05	0.08	0.05	0	0	0.08	0.08	0	C
10	16	13.75	0.08	0.05	0.08	0.05	0	0	0.11	0.0581818	0	C
10	16	17.5	0.08	0.05	0.08	0.05	0	0	0.14	0.0457143	0	C
10	10	6.25	0.08	0.05	0.08	0.08	0	0	0.05	0.08	0	C
10	10	10	0.08	0.05	0.08	0.08	0	0	0.08	0.05	0	C
10	10	13.75	0.08	0.05	0.08	0.08	0	0	0.11	0.0363636	0	C
10	10	17.5	0.08	0.05	0.08	0.08	0	0	0.14	0.0285714	0	C
10	7.27273	6.25	0.08	0.05	0.08	0.11	0	0	0.05	0.0581818	0	C
10	7.27273	10	0.08	0.05	0.08	0.11	0	0	0.08	0.0363636	0	C
10	7.27273	13.75	0.08	0.05	0.08	0.11	0	0	0.11	0.0264463	0	C
10	7.27273	17.5	0.08	0.05	0.08	0.11	0	0	0.14	0.0207792	0	C
10	5.71429	6.25	0.08	0.05	0.08	0.14	0	0	0.05	0.0457143	0	C
10	5.71429	10	0.08	0.05	0.08	0.14	0	0	0.08	0.0285714	0	C
10	5.71429	13.75	0.08	0.05	0.08	0.14	0	0	0.11	0.0207792	0	C
10	5.71429	17.5	0.08	0.05	0.08	0.14	0	0	0.14	0.0163265	0	C
10	16	4.54545	0.08	0.05	0.11	0.05	0	0	0.05	0.176	0	C
10	16	7.27273	0.08	0.05	0.11	0.05	0	0	0.08	0.11	0	C
10	16	10	0.08	0.05	0.11	0.05	0	0	0.11	0.08	0	C
10	16	12.7273	0.08	0.05	0.11	0.05	0	0	0.14	0.0628571	0	C
10	10	4.54545	0.08	0.05	0.11	0.08	0	0	0.05	0.11	0	C
10	10	7.27273	0.08	0.05	0.11	0.08	0	0	0.08	0.06875	0	C
10	10	10	0.08	0.05	0.11	0.08	0	0	0.11	0.05	0	C
10	10	12.7273	0.08	0.05	0.11	0.08	0	0	0.14	0.0392857	0	C
10	7.27273	4.54545	0.08	0.05	0.11	0.11	0	0	0.05	0.08	0	C
10	7.27273	7.27273	0.08	0.05	0.11	0.11	0	0	0.08	0.05	0	C
10	7.27273	10	0.08	0.05	0.11	0.11	0	0	0.11	0.0363636	0	C
10	7.27273	12.7273	0.08	0.05	0.11	0.11	0	0	0.14	0.0285714	0	C
10	5.71429	4.54545	0.08	0.05	0.11	0.14	0	0	0.05	0.0628571	0	C
10	5.71429	7.27273	0.08	0.05	0.11	0.14	0	0	0.08	0.0392857	0	C
10	5.71429	10	0.08	0.05	0.11	0.14	0	0	0.11	0.0285714	0	C
10	5.71429	12.7273	0.08	0.05	0.11	0.14	0	0	0.14	0.022449	0	C
10	16	3.57143	0.08	0.05	0.14	0.05	0	0	0.05	0.224	0	C
10	16	5.71429	0.08	0.05	0.14	0.05	0	0	0.08	0.14	0	C
10	16	7.85714	0.08	0.05	0.14	0.05	0	0	0.11	0.101818	0	C
10	16	10	0.08	0.05	0.14	0.05	0	0	0.14	0.08	0	C
10	10	3.57143	0.08	0.05	0.14	0.08	0	0	0.05	0.14	0	C
10	10	5.71429	0.08	0.05	0.14	0.08	0	0	0.08	0.0875	0	C
10	10	7.85714	0.08	0.05	0.14	0.08	0	0	0.11	0.0636364	0	C
10	10	10	0.08	0.05	0.14	0.08	0	0	0.14	0.05	0	C
10	7.27273	3.57143	0.08	0.05	0.14	0.11	0	0	0.05	0.101818	0	C
10	7.27273	5.71429	0.08	0.05	0.14	0.11	0	0	0.08	0.0636364	0	C
10	7.27273	7.85714	0.08	0.05	0.14	0.11	0	0	0.11	0.046281	0	C
10	7.27273	10	0.08	0.05	0.14	0.11	0	0	0.14	0.0363636	0	C
10	5.71429	3.57143	0.08	0.05	0.14	0.14	0	0	0.05	0.08	0	C
10	5.71429	5.71429	0.08	0.05	0.14	0.14	0	0	0.08	0.05	0	C
10	5.71429	7.85714	0.08	0.05	0.14	0.14	0	0	0.11	0.0363636	0	C
10	5.71429	10	0.08	0.05	0.14	0.14	0	0	0.14	0.0285714	0	C
10	16	10	0.08	0.08	0.05	0.05	0	0	0.05	0.128	0	C
10	16	16	0.08	0.08	0.05	0.05	0	0	0.08	0.08	0	C
10	16	22	0.08	0.08	0.05	0.05	0	0	0.11	0.0581818	0	C
10	16	28	0.08	0.08	0.05	0.05	0	0	0.14	0.0457143	0	C
10	10	10	0.08	0.08	0.05	0.08	0	0	0.05	0.08	0	C
10	10	16	0.08	0.08	0.05	0.08	0	0	0.08	0.05	0	C
10	10	22	0.08	0.08	0.05	0.08	0	0	0.11	0.0363636	0	C
10	10	28	0.08	0.08	0.05	0.08	0	0	0.14	0.0285714	0	C
10	7.27273	10	0.08	0.08	0.05	0.11	0	0	0.05	0.0581818	0	C
10	7.27273	16	0.08	0.08	0.05	0.11	0	0	0.08	0.0363636	0	C
10	7.27273	22	0.08	0.08	0.05	0.11	0	0	0.11	0.0264463	0	C
10	7.27273	28	0.08	0.08	0.05	0.11	0	0	0.14	0.0207792	0	C
10	5.71429	10	0.08	0.08	0.05	0.14	0	0	0.05	0.0457143	0	C
10	5.71429	16	0.08	0.08	0.05	0.14	0	0	0.08	0.0285714	0	C
10	5.71429	22	0.08	0.08	0.05	0.14	0	0	0.11	0.0207792	0	C
10	5.71429	28	0.08	0.08	0.05	0.14	0	0	0.14	0.0163265	0	C
10	16	6.25	0.08	0.08	0.08	0.05	0	0	0.05	0.2048	0	C
10	16	10	0.08	0.08	0.08	0.05	0	0	0.08	0.128	0	C
10	16	13.75	0.08	0.08	0.08	0.05	0	0	0.11	0.0930909	0	C
10	16	17.5	0.08	0.08	0.08	0.05	0	0	0.14	0.0731429	0	C
10	10	6.25	0.08	0.08	0.08	0.08	0	0	0.05	0.128	0	C
10	10	10	0.08	0.08	0.08	0.08	0	0	0.08	0.08	0	C
10	10	13.75	0.08	0.08	0.08	0.08	0	0	0.11	0.0581818	0	C
10	10	17.5	0.08	0.08	0.08	0.08	0	0	0.14	0.0457143	0	C
10	7.27273	6.25	0.08	0.08	0.08	0.11	0	0	0.05	0.0930909	0	C
10	7.27273	10	0.08	0.08	0.08	0.11	0	0	0.08	0.0581818	0	C
10	7.27273	13.75	0.08	0.08	0.08	0.11	0	0	0.11	0.042314	0	C
10	7.27273	17.5	0.08	0.08	0.08	0.11	0	0	0.14	0.0332468	0	C
10	5.71429	6.25	0.08	0.08	0.08	0.14	0	0	0.05	0.0731429	0	C
10	5.71429	10	0.08	0.08	0.08	0.14	0	0	0.08	0.0457143	0	C
10	5.71429	13.75	0.08	0.08	0.08	0.14	0	0	0.11	0.0332468	0	C
10	5.71429	17.5	0.08	0.08	0.08	0.14	0	0	0.14	0.0261224	0	C
10	16	4.54545	0.08	0.08	0.11	0.05	0	0	0.05	0.2816	0	C
10	16	7.27273	0.08	0.08	0.11	0.05	0	0	0.08	0.176	0	C
10	16	10	0.08	0.08	0.11	0.05	0	0	0.11	0.128	0	C
10	16	12.7273	0.08	0.08	0.11	0.05	0	0	0.14	0.100571	0	C
10	10	4.54545	0.08	0.08	0.11	0.08	0	0	0.05	0.176	0	C
10	10	7.27273	0.08	0.08	0.11	0.08	0	0	0.08	0.11	0	C
10	10	10	0.08	0.08	0.11	0.08	0	0	0.11	0.08	0	C
10	10	12.7273	0.08	0.08	0.11	0.08	0	0	0.14	0.0628571	0	C
10	7.27273	4.54545	0.08	0.08	0.11	0.11	0	0	0.05	0.128	0	C
10	7.27273	7.27273	0.08	0.08	0.11	0.11	0	0	0.08	0.08	0	C
10	7.27273	10	0.08	0.08	0.11	0.11	0	0	0.11	0.0581818	0	C
10	7.27273	12.7273	0.08	0.08	0.11	0.11	0	0	0.14	0.0457143	0	C
10	5.71429	4.54545	0.08	0.08	0.11	0.14	0	0	0.05	0.100571	0	C
10	5.71429	7.27273	0.08	0.08	0.11	0.14	0	0	0.08	0.0628571	0	C
10	5.71429	10	0.08	0.08	0.11	0.14	0	0	0.11	0.0457143	0	C
10	5.71429	12.7273	0.08	0.08	0.11	0.14	0	0	0.14	0.0359184	0	C
10	16	3.57143	0.08	0.08	0.14	0.05	0	0	0.05	0.3584	0	C
10	16	5.71429	0.08	0.08	0.14	0.05	0	0	0.08	0.224	0	C
10	16	7.85714	0.08	0.08	0.14	0.05	0	0	0.11	0.162909	0	C
10	16	10	0.08	0.08	0.14	0.05	0	0	0.14	0.128	0	C
10	10	3.57143	0.08	0.08	0.14	0.08	0	0	0.05	0.224	0	C
10	10	5.71429	0.08	0.08	0.14	0.08	0	0	0.08	0.14	0	C
10	10	7.85714	0.08	0.08	0.14	0.08	0	0	0.11	0.101818	0	C
10	10	10	0.08	0.08	0.14	0.08	0	0	0.14	0.08	0	C
10	7.27273	3.57143	0.08	0.08	0.14	0.11	0	0	0.05	0.162909	0	C
10	7.27273	5.71429	0.08	0.08	0.14	0.11	0	0	0.08	0.101818	0	C
10	7.27273	7.85714	0.08	0.08	0.14	0.11	0	0	0.11	0.0740496	0	C
10	7.27273	10	0.08	0.08	0.14	0.11	0	0	0.14	0.0581818	0	C
10	5.71429	3.57143	0.08	0.08	0.14	0.14	0	0	0.05	0.128	0	C
10	5.71429	5.71429	0.08	0.08	0.14	0.14	0	0	0.08	0.08	0	C
10	5.71429	7.85714	0.08	0.08	0.14	0.14	0	0	0.11	0.0581818	0	C
10	5.71429	10	0.08	0.08	0.14	0.14	0	0	0.14	0.0457143	0	C
10	16	10	0.08	0.11	0.05	0.05	0	0	0.05	0.176	0	C
10	16	16	0.08	0.11	0.05	0.05	0	0	0.08	0.11	0	C
10	16	22	0.08	0.11	0.05	0.05	0	0	0.11	0.08	0	C
10	16	28	0.08	0.11	0.05	0.05	0	0	0.14	0.0628571	0	C
10	10	10	0.08	0.11	0.05	0.08	0	0	0.05	0.11	0	C
10	10	16	0.08	0.11	0.05	0.08	0	0	0.08	0.06875	0	C
10	10	22	0.08	0.11	0.05	0.08	0	0	0.11	0.05	0	C
10	10	28	0.08	0.11	0.05	0.08	0	0	0.14	0.0392857	0	C
10	7.27273	10	0.08	0.11	0.05	0.11	0	0	0.05	0.08	0	C
10	7.27273	16	0.08	0.11	0.05	0.11	0	0	0.08	0.05	0	C
10	7.27273	22	0.08	0.11	0.05	0.11	0	0	0.11	0.0363636	0	C
10	7.27273	28	0.08	0.11	0.05	0.11	0	0	0.14	0.0285714	0	C
10	5.71429	10	0.08	0.11	0.05	0.14	0	0	0.05	0.0628571	0	C
10	5.71429	16	0.08	0.11	0.05	0.14	0	0	0.08	0.0392857	0	C
10	5.71429	22	0.08	0.11	0.05	0.14	0	0	0.11	0.0285714	0	C
10	5.71429	28	0.08	0.11	0.05	0.14	0	0	0.14	0.022449	0	C
10	16	6.25	0.08	0.11	0.08	0.05	0	0	0.05	0.2816	0	C
10	16	10	0.08	0.11	0.08	0.05	0	0	0.08	0.176	0	C
10	16	13.75	0.08	0.11	0.08	0.05	0	0	0.11	0.128	0	C
10	16	17.5	0.08	0.11	0.08	0.05	0	0	0.14	0.100571	0	C
10	10	6.25	0.08	0.11	0.08	0.08	0	0	0.05	0.176	0	C
10	10	10	0.08	0.11	0.08	0.08	0	0	0.08	0.11	0	C
10	10	13.75	0.08	0.11	0.08	0.08	0	0	0.11	0.08	0	C
10	10	17.5	0.08	0.11	0.08	0.08	0	0	0.14	0.0628571	0	C
10	7.27273	6.25	0.08	0.11	0.08	0.11	0	0	0.05	0.128	0	C
10	7.27273	10	0.08	0.11	0.08	0.11	0	0	0.08	0.08	0	C
10	7.27273	13.75	0.08	0.11	0.08	0.11	0	0	0.11	0.0581818	0	C
10	7.27273	17.5	0.08	0.11	0.08	0.11	0	0	0.14	0.0457143	0	C
10	5.71429	6.25	0.08	0.11	0.08	0.14	0	0	0.05	0.100571	0	C
10	5.71429	10	0.08	0.11	0.08	0.14	0	0	0.08	0.0628571	0	C
10	5.71429	13.75	0.08	0.11	0.08	0.14	0	0	0.11	0.0457143	0	C
10	5.71429	17.5	0.08	0.11	0.08	0.14	0	0	0.14	0.0359184	0	C
10	16	4.54545	0.08	0.11	0.11	0.05	0	0	0.05	0.3872	0	C
10	16	7.27273	0.08	0.11	0.11	0.05	0	0	0.08	0.242	0	C
10	16	10	0.08	0.11	0.11	0.05	0	0	0.11	0.176	0	C
10	16	12.7273	0.08	0.11	0.11	0.05	0	0	0.14	0.138286	0	C
10	10	4.54545	0.08	0.11	0.11	0.08	0	0	0.05	0.242	0	C
10	10	7.27273	0.08	0.11	0.11	0.08	0	0	0.08	0.15125	0	C
10	10	10	0.08	0.11	0.11	0.08	0	0	0.11	0.11	0	C
10	10	12.7273	0.08	0.11	0.11	0.08	0	0	0.14	0.0864286	0	C
10	7.27273	4.54545	0.08	0.11	0.11	0.11	0	0	0.05	0.176	0	C
10	7.27273	7.27273	0.08	0.11	0.11	0.11	0	0	0.08	0.11	0	C
10	7.27273	10	0.08	0.11	0.11	0.11	0	0	0.11	0.08	0	C
10	7.27273	12.7273	0.08	0.11	0.11	0.11	0	0	0.14	0.0628571	0	C
10	5.71429	4.54545	0.08	0.11	0.11	0.14	0	0	0.05	0.138286	0	C
10	5.71429	7.27273	0.08	0.11	0.11	0.14	0	0	0.08	0.0864286	0	C
10	5.71429	10	0.08	0.11	0.11	0.14	0	0	0.11	0.0628571	0	C
10	5.71429	12.7273	0.08	0.11	0.11	0.14	0	0	0.14	0.0493878	0	C
10	16	3.57143	0.08	0.11	0.14	0.05	0	0	0.05	0.4928	0	C
10	16	5.71429	0.08	0.11	0.14	0.05	0	0	0.08	0.308	0	C
10	16	7.85714	0.08	0.11	0.14	0.05	0	0	0.11	0.224	0	C
10	16	10	0.08	0.11	0.14	0.05	0	0	0.14	0.176	0	C
10	10	3.57143	0.08	0.11	0.14	0.08	0	0	0.05	0.308	0	C
10	10	5.71429	0.08	0.11	0.14	0.08	0	0	0.08	0.1925	0	C
10	10	7.85714	0.08	0.11	0.14	0.08	0	0	0.11	0.14	0	C
10	10	10	0.08	0.11	0.14	0.08	0	0	0.14	0.11	0	C
10	7.27273	3.57143	0.08	0.11	0.14	0.11	0	0	0.05	0.224	0	C
10	7.27273	5.71429	0.08	0.11	0.14	0.11	0	0	0.08	0.14	0	C
10	7.27273	7.85714	0.08	0.11	0.14	0.11	0	0	0.11	0.101818	0	C
10	7.27273	10	0.08	0.11	0.14	0.11	0	0	0.14	0.08	0	C
10	5.71429	3.57143	0.08	0.11	0.14	0.14	0	0	0.05	0.176	0	C
10	5.71429	5.71429	0.08	0.11	0.14	0.14	0	0	0.08	0.11	0	C
10	5.71429	7.85714	0.08	0.11	0.14	0.14	0	0	0.11	0.08	0	C
10	5.71429	10	0.08	0.11	0.14	0.14	0	0	0.14	0.0628571	0	C
10	16	10	0.08	0.14	0.05	0.05	0	0	0.05	0.224	0	C
10	16	16	0.08	0.14	0.05	0.05	0	0	0.08	0.14	0	C
10	16	22	0.08	0.14	0.05	0.05	0	0	0.11	0.101818	0	C
10	16	28	0.08	0.14	0.05	0.05	0	0	0.14	0.08	0	C
10	10	10	0.08	0.14	0.05	0.08	0	0	0.05	0.14	0	C
10	10	16	0.08	0.14	0.05	0.08	0	0	0.08	0.0875	0	C
10	10	22	0.08	0.14	0.05	0.08	0	0	0.11	0.0636364	0	C
10	10	28	0.08	0.14	0.05	0.08	0	0	0.14	0.05	0	C
10	7.27273	10	0.08	0.14	0.05	0.11	0	0	0.05	0.101818	0	C
10	7.27273	16	0.08	0.14	0.05	0.11	0	0	0.08	0.0636364	0	C
10	7.27273	22	0.08	0.14	0.05	0.11	0	0	0.11	0.046281	0	C
10	7.27273	28	0.08	0.14	0.05	0.11	0	0	0.14	0.0363636	0	C
10	5.71429	10	0.08	0.14	0.05	0.14	0	0	0.05	0.08	0	C
10	5.71429	16	0.08	0.14	0.05	0.14	0	0	0.08	0.05	0	C
10	5.71429	22	0.08	0.14	0.05	0.14	0	0	0.11	0.0363636	0	C
10	5.71429	28	0.08	0.14	0.05	0.14	0	0	0.14	0.0285714	0	C
10	16	6.25	0.08	0.14	0.08	0.05	0	0	0.05	0.3584	0	C
10	16	10	0.08	0.14	0.08	0.05	0	0	0.08	0.224	0	C
10	16	13.75	0.08	0.14	0.08	0.05	0	0	0.11	0.162909	0	C
10	16	17.5	0.08	0.14	0.08	0.05	0	0	0.14	0.128	0	C
10	10	6.25	0.08	0.14	0.08	0.08	0	0	0.05	0.224	0	C
10	10	10	0.08	0.14	0.08	0.08	0	0	0.08	0.14	0	C
10	10	13.75	0.08	0.14	0.08	0.08	0	0	0.11	0.101818	0	C
10	10	17.5	0.08	0.14	0.08	0.08	0	0	0.14	0.08	0	C
10	7.27273	6.25	0.08	0.14	0.08	0.11	0	0	0.05	0.162909	0	C
10	7.27273	10	0.08	0.14	0.08	0.11	0	0	0.08	0.101818	0	C
10	7.27273	13.75	0.08	0.14	0.08	0.11	0	0	0.11	0.0740496	0	C
10	7.27273	17.5	0.08	0.14	0.08	0.11	0	0	0.14	0.0581818	0	C
10	5.71429	6.25	0.08	0.14	0.08	0.14	0	0	0.05	0.128	0	C
10	5.71429	10	0.08	0.14	0.08	0.14	0	0	0.08	0.08	0	C
10	5.71429	13.75	0.08	0.14	0.08	0.14	0	0	0.11	0.0581818	0	C
10	5.71429	17.5	0.08	0.14	0.08	0.14	0	0	0.14	0.0457143	0	C
10	16	4.54545	0.08	0.14	0.11	0.05	0	0	0.05	0.4928	0	C
10	16	7.27273	0.08	0.14	0.11	0.05	0	0	0.08	0.308	0	C
10	16	10	0.08	0.14	0.11	0.05	0	0	0.11	0.224	0	C
10	16	12.7273	0.08	0.14	0.11	0.05	0	0	0.14	0.176	0	C
10	10	4.54545	0.08	0.14	0.11	0.08	0	0	0.05	0.308	0	C
10	10	7.27273	0.08	0.14	0.11	0.08	0	0	0.08	0.1925	0	C
10	10	10	0.08	0.14	0.11	0.08	0	0	0.11	0.14	0	C
10	10	12.7273	0.08	0.14	0.11	0.08	0	0	0.14	0.11	0	C
10	7.27273	4.54545	0.08	0.14	0.11	0.11	0	0	0.05	0.224	0	C
10	7.27273	7.27273	0.08	0.14	0.11	0.11	0	0	0.08	0.14	0	C
10	7.27273	10	0.08	0.14	0.11	0.11	0	0	0.11	0.101818	0	C
10	7.27273	12.7273	0.08	0.14	0.11	0.11	0	0	0.14	0.08	0	C
10	5.71429	4.54545	0.08	0.14	0.11	0.14	0	0	0.05	0.176	0	C
10	5.71429	7.27273	0.08	0.14	0.11	0.14	0	0	0.08	0.11	0	C
10	5.71429	10	0.08	0.14	0.11	0.14	0	0	0.11	0.08	0	C
10	5.71429	12.7273	0.08	0.14	0.11	0.14	0	0	0.14	0.0628571	0	C
10	16	3.57143	0.08	0.14	0.14	0.05	0	0	0.05	0.6272	0	C
10	16	5.71429	0.08	0.14	0.14	0.05	0	0	0.08	0.392	0	C
10	16	7.85714	0.08	0.14	0.14	0.05	0	0	0.11	0.285091	0	C
10	16	10	0.08	0.14	0.14	0.05	0	0	0.14	0.224	0	C
10	10	3.57143	0.08	0.14	0.14	0.08	0	0	0.05	0.392	0	C
10	10	5.71429	0.08	0.14	0.14	0.08	0	0	0.08	0.245	0	C
10	10	7.85714	0.08	0.14	0.14	0.08	0	0	0.11	0.178182	0	C
10	10	10	0.08	0.14	0.14	0.08	0	0	0.14	0.14	0	C
10	7.27273	3.57143	0.08	0.14	0.14	0.11	0	0	0.05	0.285091	0	C
10	7.27273	5.71429	0.08	0.14	0.14	0.11	0	0	0.08	0.178182	0	C
10	7.27273	7.85714	0.08	0.14	0.14	0.11	0	0	0.11	0.129587	0	C
10	7.27273	10	0.08	0.14	0.14	0.11	0	0	0.14	0.101818	0	C
10	5.71429	3.57143	0.08	0.14	0.14	0.14	0	0	0.05	0.224	0	C
10	5.71429	5.71429	0.08	0.14	0.14	0.14	0	0	0.08	0.14	0	C
10	5.71429	7.85714	0.08	0.14	0.14	0.14	0	0	0.11	0.101818	0	C
10	5.71429	10	0.08	0.14	0.14	0.14	0	0	0.14	0.08	0	C
10	22	10	0.11	0.05	0.05	0.05	0	0	0.05	0.11	0	C
10	22	16	0.11	0.05	0.05	0.05	0	0	0.08	0.06875	0	C
10	22	22	0.11	0.05	0.05	0.05	0	0	0.11	0.05	0	C
10	22	28	0.11	0.05	0.05	0.05	0	0	0.14	0.0392857	0	C
10	13.75	10	0.11	0.05	0.05	0.08	0	0	0.05	0.06875	0	C
10	13.75	16	0.11	0.05	0.05	0.08	0	0	0.08	0.0429688	0	C
10	13.75	22	0.11	0.05	0.05	0.08	0	0	0.11	0.03125	0	C
10	13.75	28	0.11	0.05	0.05	0.08	0	0	0.14	0.0245536	0	C
10	10	10	0.11	0.05	0.05	0.11	0	0	0.05	0.05	0	C
10	10	16	0.11	0.05	0.05	0.11	0	0	0.08	0.03125	0	C
10	10	22	0.11	0.05	0.05	0.11	0	0	0.11	0.0227273	0	C
10	10	28	0.11	0.05	0.05	0.11	0	0	0.14	0.0178571	0	C
10	7.85714	10	0.11	0.05	0.05	0.14	0	0	0.05	0.0392857	0	C
10	7.85714	16	0.11	0.05	0.05	0.14	0	0	0.08	0.0245536	0	C
10	7.85714	22	0.11	0.05	0.05	0.14	0	0	0.11	0.0178571	0	C
10	7.85714	28	0.11	0.05	0.05	0.14	0	0	0.14	0.0140306	0	C
10	22	6.25	0.11	0.05	0.08	0.05	0	0	0.05	0.176	0	C
10	22	10	0.11	0.05	0.08	0.05	0	0	0.08	0.11	0	C
10	22	13.75	0.11	0.05	0.08	0.05	0	0	0.11	0.08	0	C
10	22	17.5	0.11	0.05	0.08	0.05	0	0	0.14	0.0628571	0	C
10	13.75	6.25	0.11	0.05	0.08	0.08	0	0	0.05	0.11	0	C
10	13.75	10	0.11	0.05	0.08	0.08	0	0	0.08	0.06875	0	C
10	13.75	13.75	0.11	0.05	0.08	0.08	0	0	0.11	0.05	0	C
10	13.75	17.5	0.11	0.05	0.08	0.08	0	0	0.14	0.0392857	0	C
10	10	6.25	0.11	0.05	0.08	0.11	0	0	0.05	0.08	0	C
10	10	10	0.11	0.05	0.08	0.11	0	0	0.08	0.05	0	C
10	10	13.75	0.11	0.05	0.08	0.11	0	0	0.11	0.0363636	0	C
10	10	17.5	0.11	0.05	0.08	0.11	0	0	0.14	0.0285714	0	C
10	7.85714	6.25	0.11	0.05	0.08	0.14	0	0	0.05	0.0628571	0	C
10	7.85714	10	0.11	0.05	0.08	0.14	0	0	0.08	0.0392857	0	C
10	7.85714	13.75	0.11	0.05	0.08	0.14	0	0	0.11	0.0285714	0	C
10	7.85714	17.5	0.11	0.05	0.08	0.14	0	0	0.14	0.022449	0	C
10	22	4.54545	0.11	0.05	0.11	0.05	0	0	0.05	0.242	0	C
10	22	7.27273	0.11	0.05	0.11	0.05	0	0	0.08	0.15125	0	C
10	22	10	0.11	0.05	0.11	0.05	0	0	0.11	0.11	0	C
10	22	12.7273	0.11	0.05	0.11	0.05	0	0	0.14	0.0864286	0	C
10	13.75	4.54545	0.11	0.05	0.11	0.08	0	0	0.05	0.15125	0	C
10	13.75	7.27273	0.11	0.05	0.11	0.08	0	0	0.08	0.0945312	0	C
10	13.75	10	0.11	0.05	0.11	0.08	0	0	0.11	0.06875	0	C
10	13.75	12.7273	0.11	0.05	0.11	0.08	0	0	0.14	0.0540179	0	C
10	10	4.54545	0.11	0.05	0.11	0.11	0	0	0.05	0.11	0	C
10	10	7.27273	0.11	0.05	0.11	0.11	0	0	0.08	0.06875	0	C
10	10	10	0.11	0.05	0.11	0.11	0	0	0.11	0.05	0	C
10	10	12.7273	0.11	0.05	0.11	0.11	0	0	0.14	0.0392857	0	C
10	7.85714	4.54545	0.11	0.05	0.11	0.14	0	0	0.05	0.0864286	0	C
10	7.85714	7.27273	0.11	0.05	0.11	0.14	0	0	0.08	0.0540179	0	C
10	7.85714	10	0.11	0.05	0.11	0.14	0	0	0.11	0.0392857	0	C
10	7.85714	12.7273	0.11	0.05	0.11	0.14	0	0	0.14	0.0308673	0	C
10	22	3.57143	0.11	0.05	0.14	0.05	0	0	0.05	0.308	0	C
10	22	5.71429	0.11	0.05	0.14	0.05	0	0	0.08	0.1925	0	C
10	22	7.85714	0.11	0.05	0.14	0.05	0	0	0.11	0.14	0	C
10	22	10	0.11	0.05	0.14	0.05	0	0	0.14	0.11	0	C
10	13.75	3.57143	0.11	0.05	0.14	0.08	0	0	0.05	0.1925	0	C
10	13.75	5.71429	0.11	0.05	0.14	0.08	0	0	0.08	0.120313	0	C
10	13.75	7.85714	0.11	0.05	0.14	0.08	0	0	0.11	0.0875	0	C
10	13.75	10	0.11	0.05	0.14	0.08	0	0	0.14	0.06875	0	C
10	10	3.57143	0.11	0.05	0.14	0.11	0	0	0.05	0.14	0	C
10	10	5.71429	0.11	0.05	0.14	0.11	0	0	0.08	0.0875	0	C
10	10	7.85714	0.11	0.05	0.14	0.11	0	0	0.11	0.0636364	0	C
10	10	10	0.11	0.05	0.14	0.11	0	0	0.14	0.05	0	C
10	7.85714	3.57143	0.11	0.05	0.14	0.14	0	0	0.05	0.11	0	C
10	7.85714	5.71429	0.11	0.05	0.14	0.14	0	0	0.08	0.06875	0	C
10	7.85714	7.85714	0.11	0.05	0.14	0.14	0	0	0.11	0.05	0	C
10	7.85714	10	0.11	0.05	0.14	0.14	0	0	0.14	0.0392857	0	C
10	22	10	0.11	0.08	0.05	0.05	0	0	0.05	0.176	0	C
10	22	16	0.11	0.08	0.05	0.05	0	0	0.08	0.11	0	C
10	22	22	0.11	0.08	0.05	0.05	0	0	0.11	0.08	0	C
10	22	28	0.11	0.08	0.05	0.05	0	0	0.14	0.0628571	0	C
10	13.75	10	0.11	0.08	0.05	0.08	0	0	0.05	0.11	0	C
10	13.75	16	0.11	0.08	0.05	0.08	0	0	0.08	0.06875	0	C
10	13.75	22	0.11	0.08	0.05	0.08	0	0	0.11	0.05	0	C
10	13.75	28	0.11	0.08	0.05	0.08	0	0	0.14	0.0392857	0	C
10	10	10	0.11	0.08	0.05	0.11	0	0	0.05	0.08	0	C
10	10	16	0.11	0.08	0.05	0.11	0	0	0.08	0.05	0	C
10	10	22	0.11	0.08	0.05	0.11	0	0	0.11	0.0363636	0	C
10	10	28	0.11	0.08	0.05	0.11	0	0	0.14	0.0285714	0	C
10	7.85714	10	0.11	0.08	0.05	0.14	0	0	0.05	0.0628571	0	C
10	7.85714	16	0.11	0.08	0.05	0.14	0	0	0.08	0.0392857	0	C
10	7.85714	22	0.11	0.08	0.05	0.14	0	0	0.11	0.0285714	0	C
10	7.85714	28	0.11	0.08	0.05	0.14	0	0	0.14	0.022449	0	C
10	22	6.25	0.11	0.08	0.08	0.05	0	0	0.05	0.2816	0	C
10	22	10	0.11	0.08	0.08	0.05	0	0	0.08	0.176	0	C
10	22	13.75	0.11	0.08	0.08	0.05	0	0	0.11	0.128	0	C
10	22	17.5	0.11	0.08	0.08	0.05	0	0	0.14	0.100571	0	C
10	13.75	6.25	0.11	0.08	0.08	0.08	0	0	0.05	0.176	0	C
10	13.75	10	0.11	0.08	0.08	0.08	0	0	0.08	0.11	0	C
10	13.75	13.75	0.11	0.08	0.08	0.08	0	0	0.11	0.08	0	C
10	13.75	17.5	0.11	0.08	0.08	0.08	0	0	0.14	0.0628571	0	C
10	10	6.25	0.11	0.08	0.08	0.11	0	0	0.05	0.128	0	C
10	10	10	0.11	0.08	0.08	0.11	0	0	0.08	0.08	0	C
10	10	13.75	0.11	0.08	0.08	0.11	0	0	0.11	0.0581818	0	C
10	10	17.5	0.11	0.08	0.08	0.11	0	0	0.14	0.0457143	0	C
10	7.85714	6.25	0.11	0.08	0.08	0.14	0	0	0.05	0.100571	0	C
10	7.85714	10	0.11	0.08	0.08	0.14	0	0	0.08	0.0628571	0	C
10	7.85714	13.75	0.11	0.08	0.08	0.14	0	0	0.11	0.0457143	0	C
10	7.85714	17.5	0.11	0.08	0.08	0.14	0	0	0.14	0.0359184	0	C
10	22	4.54545	0.11	0.08	0.11	0.05	0	0	0.05	0.3872	0	C
10	22	7.27273	0.11	0.08	0.11	0.05	0	0	0.08	0.242	0	C
10	22	10	0.11	0.08	0.11	0.05	0	0	0.11	0.176	0	C
10	22	12.7273	0.11	0.08	0.11	0.05	0	0	0.14	0.138286	0	C
10	13.75	4.54545	0.11	0.08	0.11	0.08	0	0	0.05	0.242	0	C
10	13.75	7.27273	0.11	0.08	0.11	0.08	0	0	0.08	0.15125	0	C
10	13.75	10	0.11	0.08	0.11	0.08	0	0	0.11	0.11	0	C
10	13.75	12.7273	0.11	0.08	0.11	0.08	0	0	0.14	0.0864286	0	C
10	10	4.54545	0.11	0.08	0.11	0.11	0	0	0.05	0.176	0	C
10	10	7.27273	0.11	0.08	0.11	0.11	0	0	0.08	0.11	0	C
10	10	10	0.11	0.08	0.11	0.11	0	0	0.11	0.08	0	C
10	10	12.7273	0.11	0.08	0.11	0.11	0	0	0.14	0.0628571	0	C
10	7.85714	4.54545	0.11	0.08	0.11	0.14	0	0	0.05	0.138286	0	C
10	7.85714	7.27273	0.11	0.08	0.11	0.14	0	0	0.08	0.0864286	0	C
10	7.85714	10	0.11	0.08	0.11	0.14	0	0	0.11	0.0628571	0	C
10	7.85714	12.7273	0.11	0.08	0.11	0.14	0	0	0.14	0.0493878	0	C
10	22	3.57143	0.11	0.08	0.14	0.05	0	0	0.05	0.4928	0	C
10	22	5.71429	0.11	0.08	0.14	0.05	0	0	0.08	0.308	0	C
10	22	7.85714	0.11	0.08	0.14	0.05	0	0	0.11	0.224	0	C
10	22	10	0.11	0.08	0.14	0.05	0	0	0.14	0.176	0	C
10	13.75	3.57143	0.11	0.08	0.14	0.08	0	0	0.05	0.308	0	C
10	13.75	5.71429	0.11	0.08	0.14	0.08	0	0	0.08	0.1925	0	C
10	13.75	7.85714	0.11	0.08	0.14	0.08	0	0	0.11	0.14	0	C
10	13.75	10	0.11	0.08	0.14	0.08	0	0	0.14	0.11	0	C
10	10	3.57143	0.11	0.08	0.14	0.11	0	0	0.05	0.224	0	C
10	10	5.71429	0.11	0.08	0.14	0.11	0	0	0.08	0.14	0	C
10	10	7.85714	0.11	0.08	0.14	0.11	0	0	0.11	0.101818	0	C
10	10	10	0.11	0.08	0.14	0.11	0	0	0.14	0.08	0	C
10	7.85714	3.57143	0.11	0.08	0.14	0.14	0	0	0.05	0.176	0	C
10	7.85714	5.71429	0.11	0.08	0.14	0.14	0	0	0.08	0.11	0	C
10	7.85714	7.85714	0.11	0.08	0.14	0.14	0	0	0.11	0.08	0	C
10	7.85714	10	0.11	0.08	0.14	0.14	0	0	0.14	0.0628571	0	C
10	22	10	0.11	0.11	0.05	0.05	0	0	0.05	0.242	0	C
10	22	16	0.11	0.11	0.05	0.05	0	0	0.08	0.15125	0	C
10	22	22	0.11	0.11	0.05	0.05	0	0	0.11	0.11	0	C
10	22	28	0.11	0.11	0.05	0.05	0	0	0.14	0.0864286	0	C
10	13.75	10	0.11	0.11	0.05	0.08	0	0	0.05	0.15125	0	C
10	13.75	16	0.11	0.11	0.05	0.08	0	0	0.08	0.0945312	0	C
10	13.75	22	0.11	0.11	0.05	0.08	0	0	0.11	0.06875	0	C
10	13.75	28	0.11	0.11	0.05	0.08	0	0	0.14	0.0540179	0	C
10	10	10	0.11	0.11	0.05	0.11	0	0	0.05	0.11	0	C
10	10	16	0.11	0.11	0.05	0.11	0	0	0.08	0.06875	0	C
10	10	22	0.11	0.11	0.05	0.11	0	0	0.11	0.05	0	C
10	10	28	0.11	0.11	0.05	0.11	0	0	0.14	0.0392857	0	C
10	7.85714	10	0.11	0.11	0.05	0.14	0	0	0.05	0.0864286	0	C
10	7.85714	16	0.11	0.11	0.05	0.14	0	0	0.08	0.0540179	0	C
10	7.85714	22	0.11	0.11	0.05	0.14	0	0	0.11	0.0392857	0	C
10	7.85714	28	0.11	0.11	0.05	0.14	0	0	0.14	0.0308673	0	C
10	22	6.25	0.11	0.11	0.08	0.05	0	0	0.05	0.3872	0	C
10	22	10	0.11	0.11	0.08	0.05	0	0	0.08	0.242	0	C
10	22	13.75	0.11	0.11	0.08	0.05	0	0	0.11	0.176	0	C
10	22	17.5	0.11	0.11	0.08	0.05	0	0	0.14	0.138286	0	C
10	13.75	6.25	0.11	0.11	0.08	0.08	0	0	0.05	0.242	0	C
10	13.75	10	0.11	0.11	0.08	0.08	0	0	0.08	0.15125	0	C
10	13.75	13.75	0.11	0.11	0.08	0.08	0	0	0.11	0.11	0	C
10	13.75	17.5	0.11	0.11	0.08	0.08	0	0	0.14	0.0864286	0	C
10	10	6.25	0.11	0.11	0.08	0.11	0	0	0.05	0.176	0	C
10	10	10	0.11	0.11	0.08	0.11	0	0	0.08	0.11	0	C
10	10	13.75	0.11	0.11	0.08	0.11	0	0	0.11	0.08	0	C
10	10	17.5	0.11	0.11	0.08	0.11	0	0	0.14	0.0628571	0	C
10	7.85714	6.25	0.11	0.11	0.08	0.14	0	0	0.05	0.138286	0	C
10	7.85714	10	0.11	0.11	0.08	0.14	0	0	0.08	0.0864286	0	C
10	7.85714	13.75	0.11	0.11	0.08	0.14	0	0	0.11	0.0628571	0	C
10	7.85714	17.5	0.11	0.11	0.08	0.14	0	0	0.14	0.0493878	0	C
10	22	4.54545	0.11	0.11	0.11	0.05	0	0	0.05	0.5324	0	C
10	22	7.27273	0.11	0.11	0.11	0.05	0	0	0.08	0.33275	0	C
10	22	10	0.11	0.11	0.11	0.05	0	0	0.11	0.242	0	C
10	22	12.7273	0.11	0.11	0.11	0.05	0	0	0.14	0.190143	0	C
10	13.75	4.54545	0.11	0.11	0.11	0.08	0	0	0.05	0.33275	0	C
10	13.75	7.27273	0.11	0.11	0.11	0.08	0	0	0.08	0.207969	0	C
10	13.75	10	0.11	0.11	0.11	0.08	0	0	0.11	0.15125	0	C
10	13.75	12.7273	0.11	0.11	0.11	0.08	0	0	0.14	0.118839	0	C
10	10	4.54545	0.11	0.11	0.11	0.11	0	0	0.05	0.242	0	C
10	10	7.27273	0.11	0.11	0.11	0.11	0	0	0.08	0.15125	0	C
10	10	10	0.11	0.11	0.11	0.11	0	0	0.11	0.11	0	C
10	10	12.7273	0.11	0.11	0.11	0.11	0	0	0.14	0.0864286	0	C
10	7.85714	4.54545	0.11	0.11	0.11	0.14	0	0	0.05	0.190143	0	C
10	7.85714	7.27273	0.11	0.11	0.11	0.14	0	0	0.08	0.118839	0	C
10	7.85714	10	0.11	0.11	0.11	0.14	0	0	0.11	0.0864286	0	C
10	7.85714	12.7273	0.11	0.11	0.11	0.14	0	0	0.14	0.0679082	0	C
10	22	3.57143	0.11	0.11	0.14	0.05	0	0	0.05	0.6776	0	C
10	22	5.71429	0.11	0.11	0.14	0.05	0	0	0.08	0.4235	0	C
10	22	7.85714	0.11	0.11	0.14	0.05	0	0	0.11	0.308	0	C
10	22	10	0.11	0.11	0.14	0.05	0	0	0.14	0.242	0	C
10	13.75	3.57143	0.11	0.11	0.14	0.08	0	0	0.05	0.4235	0	C
10	13.75	5.71429	0.11	0.11	0.14	0.08	0	0	0.08	0.264688	0	C
10	13.75	7.85714	0.11	0.11	0.14	0.08	0	0	0.11	0.1925	0	C
10	13.75	10	0.11	0.11	0.14	0.08	0	0	0.14	0.15125	0	C
10	10	3.57143	0.11	0.11	0.14	0.11	0	0	0.05	0.308	0	C
10	10	5.71429	0.11	0.11	0.14	0.11	0	0	0.08	0.1925	0	C
10	10	7.85714	0.11	0.11	0.14	0.11	0	0	0.11	0.14	0	C
10	10	10	0.11	0.11	0.14	0.11	0	0	0.14	0.11	0	C
10	7.85714	3.57143	0.11	0.11	0.14	0.14	0	0	0.05	0.242	0	C
10	7.85714	5.71429	0.11	0.11	0.14	0.14	0	0	0.08	0.15125	0	C
10	7.85714	7.85714	0.11	0.11	0.14	0.14	0	0	0.11	0.11	0	C
10	7.85714	10	0.11	0.11	0.14	0.14	0	0	0.14	0.0864286	0	C
10	22	10	0.11	0.14	0.05	0.05	0	0	0.05	0.308	0	C
10	22	16	0.11	0.14	0.05	0.05	0	0	0.08	0.1925	0	C
10	22	22	0.11	0.14	0.05	0.05	0	0	0.11	0.14	0	C
10	22	28	0.11	0.14	0.05	0.05	0	0	0.14	0.11	0	C
10	13.75	10	0.11	0.14	0.05	0.08	0	0	0.05	0.1925	0	C
10	13.75	16	0.11	0.14	0.05	0.08	0	0	0.08	0.120313	0	C
10	13.75	22	0.11	0.14	0.05	0.08	0	0	0.11	0.0875	0	C
10	13.75	28	0.11	0.14	0.05	0.08	0	0	0.14	0.06875	0	C
10	10	10	0.11	0.14	0.05	0.11	0	0	0.05	0.14	0	C
10	10	16	0.11	0.14	0.05	0.11	0	0	0.08	0.0875	0	C
10	10	22	0.11	0.14	0.05	0.11	0	0	0.11	0.0636364	0	C
10	10	28	0.11	0.14	0.05	0.11	0	0	0.14	0.05	0	C
10	7.85714	10	0.11	0.14	0.05	0.14	0	0	0.05	0.11	0	C
10	7.85714	16	0.11	0.14	0.05	0.14	0	0	0.08	0.06875	0	C
10	7.85714	22	0.11	0.14	0.05	0.14	0	0	0.11	0.05	0	C
10	7.85714	28	0.11	0.14	0.05	0.14	0	0	0.14	0.0392857	0	C
10	22	6.25	0.11	0.14	0.08	0.05	0	0	0.05	0.4928	0	C
10	22	10	0.11	0.14	0.08	0.05	0	0	0.08	0.308	0	C
10	22	13.75	0.11	0.14	0.08	0.05	0	0	0.11	0.224	0	C
10	22	17.5	0.11	0.14	0.08	0.05	0	0	0.14	0.176	0	C
10	13.75	6.25	0.11	0.14	0.08	0.08	0	0	0.05	0.308	0	C
10	13.75	10	0.11	0.14	0.08	0.08	0	0	0.08	0.1925	0	C
10	13.75	13.75	0.11	0.14	0.08	0.08	0	0	0.11	0.14	0	C
10	13.75	17.5	0.11	0.14	0.08	0.08	0	0	0.14	0.11	0	C
10	10	6.25	0.11	0.14	0.08	0.11	0	0	0.05	0.224	0	C
10	10	10	0.11	0.14	0.08	0.11	0	0	0.08	0.14	0	C
10	10	13.75	0.11	0.14	0.08	0.11	0	0	0.11	0.101818	0	C
10	10	17.5	0.11	0.14	0.08	0.11	0	0	0.14	0.08	0	C
10	7.85714	6.25	0.11	0.14	0.08	0.14	0	0	0.05	0.176	0	C
10	7.85714	10	0.11	0.14	0.08	0.14	0	0	0.08	0.11	0	C
10	7.85714	13.75	0.11	0.14	0.08	0.14	0	0	0.11	0.08	0	C
10	7.85714	17.5	0.11	0.14	0.08	0.14	0	0	0.14	0.0628571	0	C
10	22	4.54545	0.11	0.14	0.11	0.05	0	0	0.05	0.6776	0	C
10	22	7.27273	0.11	0.14	0.11	0.05	0	0	0.08	0.4235	0	C
10	22	10	0.11	0.14	0.11	0.05	0	0	0.11	0.308	0	C
10	22	12.7273	0.11	0.14	0.11	0.05	0	0	0.14	0.242	0	C
10	13.75	4.54545	0.11	0.14	0.11	0.08	0	0	0.05	0.4235	0	C
10	13.75	7.27273	0.11	0.14	0.11	0.08	0	0	0.08	0.264688	0	C
10	13.75	10	0.11	0.14	0.11	0.08	0	0	0.11	0.1925	0	C
10	13.75	12.7273	0.11	0.14	0.11	0.08	0	0	0.14	0.15125	0	C
10	10	4.54545	0.11	0.14	0.11	0.11	0	0	0.05	0.308	0	C
10	10	7.27273	0.11	0.14	0.11	0.11	0	0	0.08	0.1925	0	C
10	10	10	0.11	0.14	0.11	0.11	0	0	0.11	0.14	0	C
10	10	12.7273	0.11	0.14	0.11	0.11	0	0	0.14	0.11	0	C
10	7.85714	4.54545	0.11	0.14	0.11	0.14	0	0	0.05	0.242	0	C
10	7.85714	7.27273	0.11	0.14	0.11	0.14	0	0	0.08	0.15125	0	C
10	7.85714	10	0.11	0.14	0.11	0.14	0	0	0.11	0.11	0	C
10	7.85714	12.7273	0.11	0.14	0.11	0.14	0	0	0.14	0.0864286	0	C
10	22	3.57143	0.11	0.14	0.14	0.05	0	0	0.05	0.8624	0	C
10	22	5.71429	0.11	0.14	0.14	0.05	0	0	0.08	0.539	0	C
10	22	7.85714	0.11	0.14	0.14	0.05	0	0	0.11	0.392	0	C
10	22	10	0.11	0.14	0.14	0.05	0	0	0.14	0.308	0	C
10	13.75	3.57143	0.11	0.14	0.14	0.08	0	0	0.05	0.539	0	C
10	13.75	5.71429	0.11	0.14	0.14	0.08	0	0	0.08	0.336875	0	C
10	13.75	7.85714	0.11	0.14	0.14	0.08	0	0	0.11	0.245	0	C
10	13.75	10	0.11	0.14	0.14	0.08	0	0	0.14	0.1925	0	C
10	10	3.57143	0.11	0.14	0.14	0.11	0	0	0.05	0.392	0	C
10	10	5.71429	0.11	0.14	0.14	0.11	0	0	0.08	0.245	0	C
10	10	7.85714	0.11	0.14	0.14	0.11	0	0	0.11	0.178182	0	C
10	10	10	0.11	0.14	0.14	0.11	0	0	0.14	0.14	0	C
10	7.85714	3.57143	0.11	0.14	0.14	0.14	0	0	0.05	0.308	0	C
10	7.85714	5.71429	0.11	0.14	0.14	0.14	0	0	0.08	0.1925	0	C
10	7.85714	7.85714	0.11	0.14	0.14	0.14	0	0	0.11	0.14	0	C
10	7.85714	10	0.11	0.14	0.14	0.14	0	0	0.14	0.11	0	C
10	28	10	0.14	0.05	0.05	0.05	0	0	0.05	0.14	0	C
10	28	16	0.14	0.05	0.05	0.05	0	0	0.08	0.0875	0	C
10	28	22	0.14	0.05	0.05	0.05	0	0	0.11	0.0636364	0	C
10	28	28	0.14	0.05	0.05	0.05	0	0	0.14	0.05	0	C
10	17.5	10	0.14	0.05	0.05	0.08	0	0	0.05	0.0875	0	C
10	17.5	16	0.14	0.05	0.05	0.08	0	0	0.08	0.0546875	0	C
10	17.5	22	0.14	0.05	0.05	0.08	0	0	0.11	0.0397727	0	C
10	17.5	28	0.14	0.05	0.05	0.08	0	0	0.14	0.03125	0	C
10	12.7273	10	0.14	0.05	0.05	0.11	0	0	0.05	0.0636364	0	C
10	12.7273	16	0.14	0.05	0.05	0.11	0	0	0.08	0.0397727	0	C
10	12.7273	22	0.14	0.05	0.05	0.11	0	0	0.11	0.0289256	0	C
10	12.7273	28	0.14	0.05	0.05	0.11	0	0	0.14	0.0227273	0	C
10	10	10	0.14	0.05	0.05	0.14	0	0	0.05	0.05	0	C
10	10	16	0.14	0.05	0.05	0.14	0	0	0.08	0.03125	0	C
10	10	22	0.14	0.05	0.05	0.14	0	0	0.11	0.0227273	0	C
10	10	28	0.14	0.05	0.05	0.14	0	0	0.14	0.0178571	0	C
10	28	6.25	0.14	0.05	0.08	0.05	0	0	0.05	0.224	0	C
10	28	10	0.14	0.05	0.08	0.05	0	0	0.08	0.14	0	C
10	28	13.75	0.14	0.05	0.08	0.05	0	0	0.11	0.101818	0	C
10	28	17.5	0.14	0.05	0.08	0.05	0	0	0.14	0.08	0	C
10	17.5	6.25	0.14	0.05	0.08	0.08	0	0	0.05	0.14	0	C
10	17.5	10	0.14	0.05	0.08	0.08	0	0	0.08	0.0875	0	C
10	17.5	13.75	0.14	0.05	0.08	0.08	0	0	0.11	0.0636364	0	C
10	17.5	17.5	0.14	0.05	0.08	0.08	0	0	0.14	0.05	0	C
10	12.7273	6.25	0.14	0.05	0.08	0.11	0	0	0.05	0.101818	0	C
10	12.7273	10	0.14	0.05	0.08	0.11	0	0	0.08	0.0636364	0	C
10	12.7273	13.75	0.14	0.05	0.08	0.11	0	0	0.11	0.046281	0	C
10	12.7273	17.5	0.14	0.05	0.08	0.11	0	0	0.14	0.0363636	0	C
10	10	6.25	0.14	0.05	0.08	0.14	0	0	0.05	0.08	0	C
10	10	10	0.14	0.05	0.08	0.14	0	0	0.08	0.05	0	C
10	10	13.75	0.14	0.05	0.08	0.14	0	0	0.11	0.0363636	0	C
10	10	17.5	0.14	0.05	0.08	0.14	0	0	0.14	0.0285714	0	C
10	28	4.54545	0.14	0.05	0.11	0.05	0	0	0.05	0.308	0	C
10	28	7.27273	0.14	0.05	0.11	0.05	0	0	0.08	0.1925	0	C
10	28	10	0.14	0.05	0.11	0.05	0	0	0.11	0.14	0	C
10	28	12.7273	0.14	0.05	0.11	0.05	0	0	0.14	0.11	0	C
10	17.5	4.54545	0.14	0.05	0.11	0.08	0	0	0.05	0.1925	0	C
10	17.5	7.27273	0.14	0.05	0.11	0.08	0	0	0.08	0.120313	0	C
10	17.5	10	0.14	0.05	0.11	0.08	0	0	0.11	0.0875	0	C
10	17.5	12.7273	0.14	0.05	0.11	0.08	0	0	0.14	0.06875	0	C
10	12.7273	4.54545	0.14	0.05	0.11	0.11	0	0	0.05	0.14	0	C
10	12.7273	7.27273	0.14	0.05	0.11	0.11	0	0	0.08	0.0875	0	C
10	12.7273	10	0.14	0.05	0.11	0.11	0	0	0.11	0.0636364	0	C
10	12.7273	12.7273	0.14	0.05	0.11	0.11	0	0	0.14	0.05	0	C
10	10	4.54545	0.14	0.05	0.11	0.14	0	0	0.05	0.11	0	C
10	10	7.27273	0.14	0.05	0.11	0.14	0	0	0.08	0.06875	0	C
10	10	10	0.14	0.05	0.11	0.14	0	0	0.11	0.05	0	C
10	10	12.7273	0.14	0.05	0.11	0.14	0	0	0.14	0.0392857	0	C
10	28	3.57143	0.14	0.05	0.14	0.05	0	0	0.05	0.392	0	C
10	28	5.71429	0.14	0.05	0.14	0.05	0	0	0.08	0.245	0	C
10	28	7.85714	0.14	0.05	0.14	0.05	0	0	0.11	0.178182	0	C
10	28	10	0.14	0.05	0.14	0.05	0	0	0.14	0.14	0	C
10	17.5	3.57143	0.14	0.05	0.14	0.08	0	0	0.05	0.245	0	C
10	17.5	5.71429	0.14	0.05	0.14	0.08	0	0	0.08	0.153125	0	C
10	17.5	7.85714	0.14	0.05	0.14	0.08	0	0	0.11	0.111364	0	C
10	17.5	10	0.14	0.05	0.14	0.08	0	0	0.14	0.0875	0	C
10	12.7273	3.57143	0.14	0.05	0.14	0.11	0	0	0.05	0.178182	0	C
10	12.7273	5.71429	0.14	0.05	0.14	0.11	0	0	0.08	0.111364	0	C
10	12.7273	7.85714	0.14	0.05	0.14	0.11	0	0	0.11	0.0809917	0	C
10	12.7273	10	0.14	0.05	0.14	0.11	0	0	0.14	0.0636364	0	C
10	10	3.57143	0.14	0.05	0.14	0.14	0	0	0.05	0.14	0	C
10	10	5.71429	0.14	0.05	0.14	0.14	0	0	0.08	0.0875	0	C
10	10	7.85714	0.14	0.05	0.14	0.14	0	0	0.11	0.0636364	0	C
10	10	10	0.14	0.05	0.14	0.14	0	0	0.14	0.05	0	C
10	28	10	0.14	0.08	0.05	0.05	0	0	0.05	0.224	0	C
10	28	16	0.14	0.08	0.05	0.05	0	0	0.08	0.14	0	C
10	28	22	0.14	0.08	0.05	0.05	0	0	0.11	0.101818	0	C
10	28	28	0.14	0.08	0.05	0.05	0	0	0.14	0.08	0	C
10	17.5	10	0.14	0.08	0.05	0.08	0	0	0.05	0.14	0	C
10	17.5	16	0.14	0.08	0.05	0.08	0	0	0.08	0.0875	0	C
10	17.5	22	0.14	0.08	0.05	0.08	0	0	0.11	0.0636364	0	C
10	17.5	28	0.14	0.08	0.05	0.08	0	0	0.14	0.05	0	C
10	12.7273	10	0.14	0.08	0.05	0.11	0	0	0.05	0.101818	0	C
10	12.7273	16	0.14	0.08	0.05	0.11	0	0	0.08	0.0636364	0	C
10	12.7273	22	0.14	0.08	0.05	0.11	0	0	0.11	0.046281	0	C
10	12.7273	28	0.14	0.08	0.05	0.11	0	0	0.14	0.0363636	0	C
10	10	10	0.14	0.08	0.05	0.14	0	0	0.05	0.08	0	C
10	10	16	0.14	0.08	0.05	0.14	0	0	0.08	0.05	0	C
10	10	22	0.14	0.08	0.05	0.14	0	0	0.11	0.0363636	0	C
10	10	28	0.14	0.08	0.05	0.14	0	0	0.14	0.0285714	0	C
10	28	6.25	0.14	0.08	0.08	0.05	0	0	0.05	0.3584	0	C
10	28	10	0.14	0.08	0.08	0.05	0	0	0.08	0.224	0	C
10	28	13.75	0.14	0.08	0.08	0.05	0	0	0.11	0.162909	0	C
10	28	17.5	0.14	0.08	0.08	0.05	0	0	0.14	0.128	0	C
10	17.5	6.25	0.14	0.08	0.08	0.08	0	0	0.05	0.224	0	C
10	17.5	10	0.14	0.08	0.08	0.08	0	0	0.08	0.14	0	C
10	17.5	13.75	0.14	0.08	0.08	0.08	0	0	0.11	0.101818	0	C
10	17.5	17.5	0.14	0.08	0.08	0.08	0	0	0.14	0.08	0	C
10	12.7273	6.25	0.14	0.08	0.08	0.11	0	0	0.05	0.162909	0	C
10	12.7273	10	0.14	0.08	0.08	0.11	0	0	0.08	0.101818	0	C
10	12.7273	13.75	0.14	0.08	0.08	0.11	0	0	0.11	0.0740496	0	C
10	12.7273	17.5	0.14	0.08	0.08	0.11	0	0	0.14	0.0581818	0	C
10	10	6.25	0.14	0.08	0.08	0.14	0	0	0.05	0.128	0	C
10	10	10	0.14	0.08	0.08	0.14	0	0	0.08	0.08	0	C
10	10	13.75	0.14	0.08	0.08	0.14	0	0	0.11	0.0581818	0	C
10	10	17.5	0.14	0.08	0.08	0.14	0	0	0.14	0.0457143	0	C
10	28	4.54545	0.14	0.08	0.11	0.05	0	0	0.05	0.4928	0	C
10	28	7.27273	0.14	0.08	0.11	0.05	0	0	0.08	0.308	0	C
10	28	10	0.14	0.08	0.11	0.05	0	0	0.11	0.224	0	C
10	28	12.7273	0.14	0.08	0.11	0.05	0	0	0.14	0.176	0	C
10	17.5	4.54545	0.14	0.08	0.11	0.08	0	0	0.05	0.308	0	C
10	17.5	7.27273	0.14	0.08	0.11	0.08	0	0	0.08	0.1925	0	C
10	17.5	10	0.14	0.08	0.11	0.08	0	0	0.11	0.14	0	C
10	17.5	12.7273	0.14	0.08	0.11	0.08	0	0	0.14	0.11	0	C
10	12.7273	4.54545	0.14	0.08	0.11	0.11	0	0	0.05	0.224	0	C
10	12.7273	7.27273	0.14	0.08	0.11	0.11	0	0	0.08	0.14	0	C
10	12.7273	10	0.14	0.08	0.11	0.11	0	0	0.11	0.101818	0	C
10	12.7273	12.7273	0.14	0.08	0.11	0.11	0	0	0.14	0.08	0	C
10	10	4.54545	0.14	0.08	0.11	0.14	0	0	0.05	0.176	0	C
10	10	7.27273	0.14	0.08	0.11	0.14	0	0	0.08	0.11	0	C
10	10	10	0.14	0.08	0.11	0.14	0	0	0.11	0.08	0	C
10	10	12.7273	0.14	0.08	0.11	0.14	0	0	0.14	0.0628571	0	C
10	28	3.57143	0.14	0.08	0.14	0.05	0	0	0.05	0.6272	0	C
10	28	5.71429	0.14	0.08	0.14	0.05	0	0	0.08	0.392	0	C
10	28	7.85714	0.14	0.08	0.14	0.05	0	0	0.11	0.285091	0	C
10	28	10	0.14	0.08	0.14	0.05	0	0	0.14	0.224	0	C
10	17.5	3.57143	0.14	0.08	0.14	0.08	0	0	0.05	0.392	0	C
10	17.5	5.71429	0.14	0.08	0.14	0.08	0	0	0.08	0.245	0	C
10	17.5	7.85714	0.14	0.08	0.14	0.08	0	0	0.11	0.178182	0	C
10	17.5	10	0.14	0.08	0.14	0.08	0	0	0.14	0.14	0	C
10	12.7273	3.57143	0.14	0.08	0.14	0.11	0	0	0.05	0.285091	0	C
10	12.7273	5.71429	0.14	0.08	0.14	0.11	0	0	0.08	0.178182	0	C
10	12.7273	7.85714	0.14	0.08	0.14	0.11	0	0	0.11	0.129587	0	C
10	12.7273	10	0.14	0.08	0.14	0.11	0	0	0.14	0.101818	0	C
10	10	3.57143	0.14	0.08	0.14	0.14	0	0	0.05	0.224	0	C
10	10	5.71429	0.14	0.08	0.14	0.14	0	0	0.08	0.14	0	C
10	10	7.85714	0.14	0.08	0.14	0.14	0	0	0.11	0.101818	0	C
10	10	10	0.14	0.08	0.14	0.14	0	0	0.14	0.08	0	C
10	28	10	0.14	0.11	0.05	0.05	0	0	0.05	0.308	0	C
10	28	16	0.14	0.11	0.05	0.05	0	0	0.08	0.1925	0	C
10	28	22	0.14	0.11	0.05	0.05	0	0	0.11	0.14	0	C
10	28	28	0.14	0.11	0.05	0.05	0	0	0.14	0.11	0	C
10	17.5	10	0.14	0.11	0.05	0.08	0	0	0.05	0.1925	0	C
10	17.5	16	0.14	0.11	0.05	0.08	0	0	0.08	0.120313	0	C
10	17.5	22	0.14	0.11	0.05	0.08	0	0	0.11	0.0875	0	C
10	17.5	28	0.14	0.11	0.05	0.08	0	0	0.14	0.06875	0	C
10	12.7273	10	0.14	0.11	0.05	0.11	0	0	0.05	0.14	0	C
10	12.7273	16	0.14	0.11	0.05	0.11	0	0	0.08	0.0875	0	C
10	12.7273	22	0.14	0.11	0.05	0.11	0	0	0.11	0.0636364	0	C
10	12.7273	28	0.14	0.11	0.05	0.11	0	0	0.14	0.05	0	C
10	10	10	0.14	0.11	0.05	0.14	0	0	0.05	0.11	0	C
10	10	16	0.14	0.11	0.05	0.14	0	0	0.08	0.06875	0	C
10	10	22	0.14	0.11	0.05	0.14	0	0	0.11	0.05	0	C
[truncated: 126,016 more rows]
