# Supplementary material for: Heritable epigenetic changes are constrained by the dynamics of regulatory architectures
Source: bioRxiv preprint, doi:10.1101/2023.06.07.544138, version 3 (2023-12-08)
Supplement: Table S2 [file 544138_file04.xlsx]

## Sheet: Table_S1_parameters_of_persiste
X.run.number.	molecule.kinds	positive.interactions	link.chance	perturb.kind	perturb.phase	cycle.time	perturb.time	perturb.freq	stability.gens	total.time	stasis.level	max.ever.molecules	max.molecules	X.step.	robust.measure	turtles.at.end	positive.links	negative.links	system.change	binary_TEI
11	2	50	50	none	0	2	5	100	50	500	5000	500000	500	500	1	2	2	0	0	0
206	2	50	50	none	0	2	5	100	50	500	5000	500000	500	500	1	2	2	0	0	0
299	2	50	50	none	0	2	5	100	50	500	5000	500000	500	500	1	2	2	0	0	0
125	2	50	50	none	0	2	5	100	50	500	5000	500000	500	500	1	2	2	0	0	0
75	2	50	50	none	0	2	5	100	50	500	5000	500000	500	500	1	2	2	0	0	0
87	2	50	50	none	0	2	5	100	50	500	5000	500000	500	500	1	2	2	0	0	0
255	2	50	50	none	0	2	5	100	50	500	5000	500000	500	500	1	2	2	0	0	0
742	2	50	50	none	0	2	5	100	50	500	5000	500000	500	500	1	2	2	0	0	0
232	2	50	50	none	0	2	5	100	50	500	5000	500000	500	500	1	2	2	0	0	0
185	2	50	50	none	0	2	5	100	50	500	5000	500000	500	500	1	2	2	0	0	0
4	2	50	50	none	0	2	5	100	50	500	5000	500000	500	500	1	2	2	0	0	0
580	2	50	50	none	0	2	5	100	50	500	5000	500000	500	500	1	2	2	0	0	0
287	2	50	50	none	0	2	5	100	50	500	5000	500000	500	500	1	2	2	0	0	0
203	2	50	50	none	0	2	5	100	50	500	5000	500000	500	500	1	2	2	0	0	0
499	2	50	50	none	0	2	5	100	50	500	5000	500000	500	500	1	2	2	0	0	0
551	2	50	50	none	0	2	5	100	50	500	5000	500000	500	500	1	2	2	0	0	0
507	2	50	50	none	0	2	5	100	50	500	5000	500000	500	500	1	2	2	0	0	0
389	2	50	50	none	0	2	5	100	50	500	5000	500000	500	500	1	2	2	0	0	0
335	2	50	50	none	0	2	5	100	50	500	5000	500000	500	500	1	2	2	0	0	0
266	2	50	50	none	0	2	5	100	50	500	5000	500000	500	500	1	2	2	0	0	0
748	2	50	50	none	0	2	5	100	50	500	5000	500000	500	500	1	2	2	0	0	0
567	2	50	50	none	0	2	5	100	50	500	5000	500000	500	500	1	2	2	0	0	0
1063	2	50	50	none	1	2	5	100	50	500	5000	500000	500	500	1	2	2	0	0	0
601	2	50	50	none	0	2	5	100	50	500	5000	500000	500	500	1	2	2	0	0	0
651	2	50	50	none	0	2	5	100	50	500	5000	500000	500	500	1	2	2	0	0	0
1036	2	50	50	none	1	2	5	100	50	500	5000	500000	500	500	1	2	2	0	0	0
644	2	50	50	none	0	2	5	100	50	500	5000	500000	500	500	1	2	2	0	0	0
936	2	50	50	none	0	2	5	100	50	500	5000	500000	500	500	1	2	2	0	0	0
537	2	50	50	none	0	2	5	100	50	500	5000	500000	500	500	1	2	2	0	0	0
947	2	50	50	none	0	2	5	100	50	500	5000	500000	500	500	1	2	2	0	0	0
765	2	50	50	none	0	2	5	100	50	500	5000	500000	500	500	1	2	2	0	0	0
907	2	50	50	none	0	2	5	100	50	500	5000	500000	500	500	1	2	2	0	0	0
1017	2	50	50	none	1	2	5	100	50	500	5000	500000	500	500	1	2	2	0	0	0
956	2	50	50	none	0	2	5	100	50	500	5000	500000	500	500	1	2	2	0	0	0
1071	2	50	50	none	1	2	5	100	50	500	5000	500000	500	500	1	2	2	0	0	0
673	2	50	50	none	0	2	5	100	50	500	5000	500000	500	500	1	2	2	0	0	0
599	2	50	50	none	0	2	5	100	50	500	5000	500000	500	500	1	2	2	0	0	0
198	2	50	50	none	0	2	5	100	50	500	5000	500000	500	500	1	2	2	0	0	0
1047	2	50	50	none	1	2	5	100	50	500	5000	500000	500	500	1	2	2	0	0	0
953	2	50	50	none	0	2	5	100	50	500	5000	500000	500	500	1	2	2	0	0	0
729	2	50	50	none	0	2	5	100	50	500	5000	500000	500	500	1	2	2	0	0	0
1443	2	50	50	none	1	2	5	100	50	500	5000	500000	500	500	1	2	2	0	0	0
1086	2	50	50	none	1	2	5	100	50	500	5000	500000	500	500	1	2	2	0	0	0
1139	2	50	50	none	1	2	5	100	50	500	5000	500000	500	500	1	2	2	0	0	0
801	2	50	50	none	0	2	5	100	50	500	5000	500000	500	500	1	2	2	0	0	0
1029	2	50	50	none	1	2	5	100	50	500	5000	500000	500	500	1	2	2	0	0	0
950	2	50	50	none	0	2	5	100	50	500	5000	500000	500	500	1	2	2	0	0	0
1246	2	50	50	none	1	2	5	100	50	500	5000	500000	500	500	1	2	2	0	0	0
702	2	50	50	none	0	2	5	100	50	500	5000	500000	500	500	1	2	2	0	0	0
1082	2	50	50	none	1	2	5	100	50	500	5000	500000	500	500	1	2	2	0	0	0
1264	2	50	50	none	1	2	5	100	50	500	5000	500000	500	500	1	2	2	0	0	0
1171	2	50	50	none	1	2	5	100	50	500	5000	500000	500	500	1	2	2	0	0	0
998	2	50	50	none	0	2	5	100	50	500	5000	500000	500	500	1	2	2	0	0	0
605	2	50	50	none	0	2	5	100	50	500	5000	500000	500	500	1	2	2	0	0	0
814	2	50	50	none	0	2	5	100	50	500	5000	500000	500	500	1	2	2	0	0	0
1242	2	50	50	none	1	2	5	100	50	500	5000	500000	500	500	1	2	2	0	0	0
1390	2	50	50	none	1	2	5	100	50	500	5000	500000	500	500	1	2	2	0	0	0
1256	2	50	50	none	1	2	5	100	50	500	5000	500000	500	500	1	2	2	0	0	0
979	2	50	50	none	0	2	5	100	50	500	5000	500000	500	500	1	2	2	0	0	0
1321	2	50	50	none	1	2	5	100	50	500	5000	500000	500	500	1	2	2	0	0	0
1442	2	50	50	none	1	2	5	100	50	500	5000	500000	500	500	1	2	2	0	0	0
1383	2	50	50	none	1	2	5	100	50	500	5000	500000	500	500	1	2	2	0	0	0
1136	2	50	50	none	1	2	5	100	50	500	5000	500000	500	500	1	2	2	0	0	0
1619	2	50	50	none	1	2	5	100	50	500	5000	500000	500	500	1	2	2	0	0	0
1471	2	50	50	none	1	2	5	100	50	500	5000	500000	500	500	1	2	2	0	0	0
1590	2	50	50	none	1	2	5	100	50	500	5000	500000	500	500	1	2	2	0	0	0
1526	2	50	50	none	1	2	5	100	50	500	5000	500000	500	500	1	2	2	0	0	0
1231	2	50	50	none	1	2	5	100	50	500	5000	500000	500	500	1	2	2	0	0	0
1625	2	50	50	none	1	2	5	100	50	500	5000	500000	500	500	1	2	2	0	0	0
1576	2	50	50	none	1	2	5	100	50	500	5000	500000	500	500	1	2	2	0	0	0
1130	2	50	50	none	1	2	5	100	50	500	5000	500000	500	500	1	2	2	0	0	0
1518	2	50	50	none	1	2	5	100	50	500	5000	500000	500	500	1	2	2	0	0	0
1695	2	50	50	none	1	2	5	100	50	500	5000	500000	500	500	1	2	2	0	0	0
1659	2	50	50	none	1	2	5	100	50	500	5000	500000	500	500	1	2	2	0	0	0
1704	2	50	50	none	1	2	5	100	50	500	5000	500000	500	500	1	2	2	0	0	0
1759	2	50	50	none	1	2	5	100	50	500	5000	500000	500	500	1	2	2	0	0	0
1661	2	50	50	none	1	2	5	100	50	500	5000	500000	500	500	1	2	2	0	0	0
1412	2	50	50	none	1	2	5	100	50	500	5000	500000	500	500	1	2	2	0	0	0
1712	2	50	50	none	1	2	5	100	50	500	5000	500000	500	500	1	2	2	0	0	0
1823	2	50	50	none	1	2	5	100	50	500	5000	500000	500	500	1	2	2	0	0	0
1579	2	50	50	none	1	2	5	100	50	500	5000	500000	500	500	1	2	2	0	0	0
1838	2	50	50	none	1	2	5	100	50	500	5000	500000	500	500	1	2	2	0	0	0
1959	2	50	50	none	1	2	5	100	50	500	5000	500000	500	500	1	2	2	0	0	0
1418	2	50	50	none	1	2	5	100	50	500	5000	500000	500	500	1	2	2	0	0	0
1775	2	50	50	none	1	2	5	100	50	500	5000	500000	500	500	1	2	2	0	0	0
2002	2	50	50	none	2	2	5	100	50	500	5000	500000	500	500	1	2	2	0	0	0
1939	2	50	50	none	1	2	5	100	50	500	5000	500000	500	500	1	2	2	0	0	0
1880	2	50	50	none	1	2	5	100	50	500	5000	500000	500	500	1	2	2	0	0	0
1865	2	50	50	none	1	2	5	100	50	500	5000	500000	500	500	1	2	2	0	0	0
816	2	50	50	none	0	2	5	100	50	500	5000	500000	500	500	1	2	2	0	0	0
1843	2	50	50	none	1	2	5	100	50	500	5000	500000	500	500	1	2	2	0	0	0
2218	2	50	50	none	2	2	5	100	50	500	5000	500000	500	500	1	2	2	0	0	0
2059	2	50	50	none	2	2	5	100	50	500	5000	500000	500	500	1	2	2	0	0	0
1361	2	50	50	none	1	2	5	100	50	500	5000	500000	500	500	1	2	2	0	0	0
1440	2	50	50	none	1	2	5	100	50	500	5000	500000	500	500	1	2	2	0	0	0
2320	2	50	50	none	2	2	5	100	50	500	5000	500000	500	500	1	2	2	0	0	0
2144	2	50	50	none	2	2	5	100	50	500	5000	500000	500	500	1	2	2	0	0	0
1961	2	50	50	none	1	2	5	100	50	500	5000	500000	500	500	1	2	2	0	0	0
2193	2	50	50	none	2	2	5	100	50	500	5000	500000	500	500	1	2	2	0	0	0
1944	2	50	50	none	1	2	5	100	50	500	5000	500000	500	500	1	2	2	0	0	0
2441	2	50	50	none	2	2	5	100	50	500	5000	500000	500	500	1	2	2	0	0	0
2178	2	50	50	none	2	2	5	100	50	500	5000	500000	500	500	1	2	2	0	0	0
1754	2	50	50	none	1	2	5	100	50	500	5000	500000	500	500	1	2	2	0	0	0
2229	2	50	50	none	2	2	5	100	50	500	5000	500000	500	500	1	2	2	0	0	0
3014	2	50	50	none	3	2	5	100	50	500	5000	500000	500	500	1	2	2	0	0	0
2051	2	50	50	none	2	2	5	100	50	500	5000	500000	500	500	1	2	2	0	0	0
3006	2	50	50	none	3	2	5	100	50	500	5000	500000	500	500	1	2	2	0	0	0
2727	2	50	50	none	2	2	5	100	50	500	5000	500000	500	500	1	2	2	0	0	0
2829	2	50	50	none	2	2	5	100	50	500	5000	500000	500	500	1	2	2	0	0	0
2289	2	50	50	none	2	2	5	100	50	500	5000	500000	500	500	1	2	2	0	0	0
2440	2	50	50	none	2	2	5	100	50	500	5000	500000	500	500	1	2	2	0	0	0
2589	2	50	50	none	2	2	5	100	50	500	5000	500000	500	500	1	2	2	0	0	0
2705	2	50	50	none	2	2	5	100	50	500	5000	500000	500	500	1	2	2	0	0	0
2725	2	50	50	none	2	2	5	100	50	500	5000	500000	500	500	1	2	2	0	0	0
2575	2	50	50	none	2	2	5	100	50	500	5000	500000	500	500	1	2	2	0	0	0
3039	2	50	50	none	3	2	5	100	50	500	5000	500000	500	500	1	2	2	0	0	0
3084	2	50	50	none	3	2	5	100	50	500	5000	500000	500	500	1	2	2	0	0	0
3125	2	50	50	none	3	2	5	100	50	500	5000	500000	500	500	1	2	2	0	0	0
3172	2	50	50	none	3	2	5	100	50	500	5000	500000	500	500	1	2	2	0	0	0
3220	2	50	50	none	3	2	5	100	50	500	5000	500000	500	500	1	2	2	0	0	0
3104	2	50	50	none	3	2	5	100	50	500	5000	500000	500	500	1	2	2	0	0	0
2786	2	50	50	none	2	2	5	100	50	500	5000	500000	500	500	1	2	2	0	0	0
3086	2	50	50	none	3	2	5	100	50	500	5000	500000	500	500	1	2	2	0	0	0
2997	2	50	50	none	2	2	5	100	50	500	5000	500000	500	500	1	2	2	0	0	0
1641	2	50	50	none	1	2	5	100	50	500	5000	500000	500	500	1	2	2	0	0	0
3551	2	50	50	none	3	2	5	100	50	500	5000	500000	500	500	1	2	2	0	0	0
3143	2	50	50	none	3	2	5	100	50	500	5000	500000	500	500	1	2	2	0	0	0
3403	2	50	50	none	3	2	5	100	50	500	5000	500000	500	500	1	2	2	0	0	0
3012	2	50	50	none	3	2	5	100	50	500	5000	500000	500	500	1	2	2	0	0	0
4029	2	50	50	none	4	2	5	100	50	500	5000	500000	500	500	1	2	2	0	0	0
3300	2	50	50	none	3	2	5	100	50	500	5000	500000	500	500	1	2	2	0	0	0
3302	2	50	50	none	3	2	5	100	50	500	5000	500000	500	500	1	2	2	0	0	0
3068	2	50	50	none	3	2	5	100	50	500	5000	500000	500	500	1	2	2	0	0	0
3267	2	50	50	none	3	2	5	100	50	500	5000	500000	500	500	1	2	2	0	0	0
3448	2	50	50	none	3	2	5	100	50	500	5000	500000	500	500	1	2	2	0	0	0
3560	2	50	50	none	3	2	5	100	50	500	5000	500000	500	500	1	2	2	0	0	0
3935	2	50	50	none	3	2	5	100	50	500	5000	500000	500	500	1	2	2	0	0	0
3481	2	50	50	none	3	2	5	100	50	500	5000	500000	500	500	1	2	2	0	0	0
3462	2	50	50	none	3	2	5	100	50	500	5000	500000	500	500	1	2	2	0	0	0
3807	2	50	50	none	3	2	5	100	50	500	5000	500000	500	500	1	2	2	0	0	0
3863	2	50	50	none	3	2	5	100	50	500	5000	500000	500	500	1	2	2	0	0	0
3672	2	50	50	none	3	2	5	100	50	500	5000	500000	500	500	1	2	2	0	0	0
3850	2	50	50	none	3	2	5	100	50	500	5000	500000	500	500	1	2	2	0	0	0
1850	2	50	50	none	1	2	5	100	50	500	5000	500000	500	500	1	2	2	0	0	0
3229	2	50	50	none	3	2	5	100	50	500	5000	500000	500	500	1	2	2	0	0	0
3911	2	50	50	none	3	2	5	100	50	500	5000	500000	500	500	1	2	2	0	0	0
3736	2	50	50	none	3	2	5	100	50	500	5000	500000	500	500	1	2	2	0	0	0
3809	2	50	50	none	3	2	5	100	50	500	5000	500000	500	500	1	2	2	0	0	0
3961	2	50	50	none	3	2	5	100	50	500	5000	500000	500	500	1	2	2	0	0	0
3947	2	50	50	none	3	2	5	100	50	500	5000	500000	500	500	1	2	2	0	0	0
3901	2	50	50	none	3	2	5	100	50	500	5000	500000	500	500	1	2	2	0	0	0
3808	2	50	50	none	3	2	5	100	50	500	5000	500000	500	500	1	2	2	0	0	0
3602	2	50	50	none	3	2	5	100	50	500	5000	500000	500	500	1	2	2	0	0	0
3454	2	50	50	none	3	2	5	100	50	500	5000	500000	500	500	1	2	2	0	0	0
2954	2	50	50	none	2	2	5	100	50	500	5000	500000	500	500	1	2	2	0	0	0
3933	2	50	50	none	3	2	5	100	50	500	5000	500000	500	500	1	2	2	0	0	0
3458	2	50	50	none	3	2	5	100	50	500	5000	500000	500	500	1	2	2	0	0	0
4213	2	50	50	none	4	2	5	100	50	500	5000	500000	500	500	1	2	2	0	0	0
4225	2	50	50	none	4	2	5	100	50	500	5000	500000	500	500	1	2	2	0	0	0
4706	2	50	50	none	4	2	5	100	50	500	5000	500000	500	500	1	2	2	0	0	0
4425	2	50	50	none	4	2	5	100	50	500	5000	500000	500	500	1	2	2	0	0	0
4348	2	50	50	none	4	2	5	100	50	500	5000	500000	500	500	1	2	2	0	0	0
4320	2	50	50	none	4	2	5	100	50	500	5000	500000	500	500	1	2	2	0	0	0
4439	2	50	50	none	4	2	5	100	50	500	5000	500000	500	500	1	2	2	0	0	0
4598	2	50	50	none	4	2	5	100	50	500	5000	500000	500	500	1	2	2	0	0	0
5039	2	50	50	lof	0	2	5	100	50	500	5000	500000	500	500	1	2	2	0	0	0
4402	2	50	50	none	4	2	5	100	50	500	5000	500000	500	500	1	2	2	0	0	0
4784	2	50	50	none	4	2	5	100	50	500	5000	500000	500	500	1	2	2	0	0	0
4741	2	50	50	none	4	2	5	100	50	500	5000	500000	500	500	1	2	2	0	0	0
4627	2	50	50	none	4	2	5	100	50	500	5000	500000	500	500	1	2	2	0	0	0
4712	2	50	50	none	4	2	5	100	50	500	5000	500000	500	500	1	2	2	0	0	0
4899	2	50	50	none	4	2	5	100	50	500	5000	500000	500	500	1	2	2	0	0	0
3675	2	50	50	none	3	2	5	100	50	500	5000	500000	500	500	1	2	2	0	0	0
5079	2	50	50	lof	0	2	5	100	50	500	5000	500000	500	500	1	2	2	0	0	0
4978	2	50	50	none	4	2	5	100	50	500	5000	500000	500	500	1	2	2	0	0	0
4957	2	50	50	none	4	2	5	100	50	500	5000	500000	500	500	1	2	2	0	0	0
3339	2	50	50	none	3	2	5	100	50	500	5000	500000	500	500	1	2	2	0	0	0
4680	2	50	50	none	4	2	5	100	50	500	5000	500000	500	500	1	2	2	0	0	0
5006	2	50	50	lof	0	2	5	100	50	500	5000	500000	500	500	1	2	2	0	0	0
5038	2	50	50	lof	0	2	5	100	50	500	5000	500000	500	500	1	2	2	0	0	0
4476	2	50	50	none	4	2	5	100	50	500	5000	500000	500	500	1	2	2	0	0	0
5114	2	50	50	lof	0	2	5	100	50	500	5000	500000	500	500	1	2	2	0	0	0
3498	2	50	50	none	3	2	5	100	50	500	5000	500000	500	500	1	2	2	0	0	0
4133	2	50	50	none	4	2	5	100	50	500	5000	500000	500	500	1	2	2	0	0	0
5043	2	50	50	lof	0	2	5	100	50	500	5000	500000	500	500	1	2	2	0	0	0
4837	2	50	50	none	4	2	5	100	50	500	5000	500000	500	500	1	2	2	0	0	0
5085	2	50	50	lof	0	2	5	100	50	500	5000	500000	500	500	1	2	2	0	0	0
4878	2	50	50	none	4	2	5	100	50	500	5000	500000	500	500	1	2	2	0	0	0
5169	2	50	50	lof	0	2	5	100	50	500	5000	500000	500	500	1	2	2	0	0	0
5473	2	50	50	lof	0	2	5	100	50	500	5000	500000	500	500	1	2	2	0	0	0
4940	2	50	50	none	4	2	5	100	50	500	5000	500000	500	500	1	2	2	0	0	0
5364	2	50	50	lof	0	2	5	100	50	500	5000	500000	500	500	1	2	2	0	0	0
5385	2	50	50	lof	0	2	5	100	50	500	5000	500000	500	500	1	2	2	0	0	0
4670	2	50	50	none	4	2	5	100	50	500	5000	500000	500	500	1	2	2	0	0	0
5483	2	50	50	lof	0	2	5	100	50	500	5000	500000	500	500	1	2	2	0	0	0
5471	2	50	50	lof	0	2	5	100	50	500	5000	500000	500	500	1	2	2	0	0	0
5463	2	50	50	lof	0	2	5	100	50	500	5000	500000	500	500	1	2	2	0	0	0
5180	2	50	50	lof	0	2	5	100	50	500	5000	500000	500	500	1	2	2	0	0	0
5624	2	50	50	lof	0	2	5	100	50	500	5000	500000	500	500	1	2	2	0	0	0
5408	2	50	50	lof	0	2	5	100	50	500	5000	500000	500	500	1	2	2	0	0	0
3513	2	50	50	none	3	2	5	100	50	500	5000	500000	500	500	1	2	2	0	0	0
5647	2	50	50	lof	0	2	5	100	50	500	5000	500000	500	500	1	2	2	0	0	0
5184	2	50	50	lof	0	2	5	100	50	500	5000	500000	500	500	1	2	2	0	0	0
3945	2	50	50	none	3	2	5	100	50	500	5000	500000	500	500	1	2	2	0	0	0
4376	2	50	50	none	4	2	5	100	50	500	5000	500000	500	500	1	2	2	0	0	0
4870	2	50	50	none	4	2	5	100	50	500	5000	500000	500	500	1	2	2	0	0	0
5396	2	50	50	lof	0	2	5	100	50	500	5000	500000	500	500	1	2	2	0	0	0
5836	2	50	50	lof	0	2	5	100	50	500	5000	500000	500	500	1	2	2	0	0	0
5711	2	50	50	lof	0	2	5	100	50	500	5000	500000	500	500	1	2	2	0	0	0
5551	2	50	50	lof	0	2	5	100	50	500	5000	500000	500	500	1	2	2	0	0	0
5758	2	50	50	lof	0	2	5	100	50	500	5000	500000	500	500	1	2	2	0	0	0
5713	2	50	50	lof	0	2	5	100	50	500	5000	500000	500	500	1	2	2	0	0	0
4858	2	50	50	none	4	2	5	100	50	500	5000	500000	500	500	1	2	2	0	0	0
5803	2	50	50	lof	0	2	5	100	50	500	5000	500000	500	500	1	2	2	0	0	0
5650	2	50	50	lof	0	2	5	100	50	500	5000	500000	500	500	1	2	2	0	0	0
5924	2	50	50	lof	0	2	5	100	50	500	5000	500000	500	500	1	2	2	0	0	0
5578	2	50	50	lof	0	2	5	100	50	500	5000	500000	500	500	1	2	2	0	0	0
5697	2	50	50	lof	0	2	5	100	50	500	5000	500000	500	500	1	2	2	0	0	0
5098	2	50	50	lof	0	2	5	100	50	500	5000	500000	500	500	1	2	2	0	0	0
6022	2	50	50	lof	1	2	5	100	50	500	5000	500000	500	500	1	2	2	0	0	0
5939	2	50	50	lof	0	2	5	100	50	500	5000	500000	500	500	1	2	2	0	0	0
6321	2	50	50	lof	1	2	5	100	50	500	5000	500000	500	500	1	2	2	0	0	0
5769	2	50	50	lof	0	2	5	100	50	500	5000	500000	500	500	1	2	2	0	0	0
6231	2	50	50	lof	1	2	5	100	50	500	5000	500000	500	500	1	2	2	0	0	0
6302	2	50	50	lof	1	2	5	100	50	500	5000	500000	500	500	1	2	2	0	0	0
6188	2	50	50	lof	1	2	5	100	50	500	5000	500000	500	500	1	2	2	0	0	0
6252	2	50	50	lof	1	2	5	100	50	500	5000	500000	500	500	1	2	2	0	0	0
6257	2	50	50	lof	1	2	5	100	50	500	5000	500000	500	500	1	2	2	0	0	0
6271	2	50	50	lof	1	2	5	100	50	500	5000	500000	500	500	1	2	2	0	0	0
6045	2	50	50	lof	1	2	5	100	50	500	5000	500000	500	500	1	2	2	0	0	0
6417	2	50	50	lof	1	2	5	100	50	500	5000	500000	500	500	1	2	2	0	0	0
6055	2	50	50	lof	1	2	5	100	50	500	5000	500000	500	500	1	2	2	0	0	0
6124	2	50	50	lof	1	2	5	100	50	500	5000	500000	500	500	1	2	2	0	0	0
6374	2	50	50	lof	1	2	5	100	50	500	5000	500000	500	500	1	2	2	0	0	0
6243	2	50	50	lof	1	2	5	100	50	500	5000	500000	500	500	1	2	2	0	0	0
4958	2	50	50	none	4	2	5	100	50	500	5000	500000	500	500	1	2	2	0	0	0
6399	2	50	50	lof	1	2	5	100	50	500	5000	500000	500	500	1	2	2	0	0	0
5158	2	50	50	lof	0	2	5	100	50	500	5000	500000	500	500	1	2	2	0	0	0
3742	2	50	50	none	3	2	5	100	50	500	5000	500000	500	500	1	2	2	0	0	0
5413	2	50	50	lof	0	2	5	100	50	500	5000	500000	500	500	1	2	2	0	0	0
6781	2	50	50	lof	1	2	5	100	50	500	5000	500000	500	500	1	2	2	0	0	0
6713	2	50	50	lof	1	2	5	100	50	500	5000	500000	500	500	1	2	2	0	0	0
5900	2	50	50	lof	0	2	5	100	50	500	5000	500000	500	500	1	2	2	0	0	0
5984	2	50	50	lof	0	2	5	100	50	500	5000	500000	500	500	1	2	2	0	0	0
6699	2	50	50	lof	1	2	5	100	50	500	5000	500000	500	500	1	2	2	0	0	0
6890	2	50	50	lof	1	2	5	100	50	500	5000	500000	500	500	1	2	2	0	0	0
5482	2	50	50	lof	0	2	5	100	50	500	5000	500000	500	500	1	2	2	0	0	0
7015	2	50	50	lof	2	2	5	100	50	500	5000	500000	500	500	1	2	2	0	0	0
6688	2	50	50	lof	1	2	5	100	50	500	5000	500000	500	500	1	2	2	0	0	0
6743	2	50	50	lof	1	2	5	100	50	500	5000	500000	500	500	1	2	2	0	0	0
6755	2	50	50	lof	1	2	5	100	50	500	5000	500000	500	500	1	2	2	0	0	0
6624	2	50	50	lof	1	2	5	100	50	500	5000	500000	500	500	1	2	2	0	0	0
6987	2	50	50	lof	1	2	5	100	50	500	5000	500000	500	500	1	2	2	0	0	0
5795	2	50	50	lof	0	2	5	100	50	500	5000	500000	500	500	1	2	2	0	0	0
7040	2	50	50	lof	2	2	5	100	50	500	5000	500000	500	500	1	2	2	0	0	0
6396	2	50	50	lof	1	2	5	100	50	500	5000	500000	500	500	1	2	2	0	0	0
7115	2	50	50	lof	2	2	5	100	50	500	5000	500000	500	500	1	2	2	0	0	0
4822	2	50	50	none	4	2	5	100	50	500	5000	500000	500	500	1	2	2	0	0	0
7194	2	50	50	lof	2	2	5	100	50	500	5000	500000	500	500	1	2	2	0	0	0
7364	2	50	50	lof	2	2	5	100	50	500	5000	500000	500	500	1	2	2	0	0	0
6793	2	50	50	lof	1	2	5	100	50	500	5000	500000	500	500	1	2	2	0	0	0
6554	2	50	50	lof	1	2	5	100	50	500	5000	500000	500	500	1	2	2	0	0	0
6815	2	50	50	lof	1	2	5	100	50	500	5000	500000	500	500	1	2	2	0	0	0
4695	2	50	50	none	4	2	5	100	50	500	5000	500000	500	500	1	2	2	0	0	0
7448	2	50	50	lof	2	2	5	100	50	500	5000	500000	500	500	1	2	2	0	0	0
6960	2	50	50	lof	1	2	5	100	50	500	5000	500000	500	500	1	2	2	0	0	0
7356	2	50	50	lof	2	2	5	100	50	500	5000	500000	500	500	1	2	2	0	0	0
7000	2	50	50	lof	1	2	5	100	50	500	5000	500000	500	500	1	2	2	0	0	0
7481	2	50	50	lof	2	2	5	100	50	500	5000	500000	500	500	1	2	2	0	0	0
7471	2	50	50	lof	2	2	5	100	50	500	5000	500000	500	500	1	2	2	0	0	0
7265	2	50	50	lof	2	2	5	100	50	500	5000	500000	500	500	1	2	2	0	0	0
7627	2	50	50	lof	2	2	5	100	50	500	5000	500000	500	500	1	2	2	0	0	0
7486	2	50	50	lof	2	2	5	100	50	500	5000	500000	500	500	1	2	2	0	0	0
7933	2	50	50	lof	2	2	5	100	50	500	5000	500000	500	500	1	2	2	0	0	0
7496	2	50	50	lof	2	2	5	100	50	500	5000	500000	500	500	1	2	2	0	0	0
7619	2	50	50	lof	2	2	5	100	50	500	5000	500000	500	500	1	2	2	0	0	0
7813	2	50	50	lof	2	2	5	100	50	500	5000	500000	500	500	1	2	2	0	0	0
7308	2	50	50	lof	2	2	5	100	50	500	5000	500000	500	500	1	2	2	0	0	0
8144	2	50	50	lof	3	2	5	100	50	500	5000	500000	500	500	1	2	2	0	0	0
7385	2	50	50	lof	2	2	5	100	50	500	5000	500000	500	500	1	2	2	0	0	0
7597	2	50	50	lof	2	2	5	100	50	500	5000	500000	500	500	1	2	2	0	0	0
7798	2	50	50	lof	2	2	5	100	50	500	5000	500000	500	500	1	2	2	0	0	0
8626	2	50	50	lof	3	2	5	100	50	500	5000	500000	500	500	1	2	2	0	0	0
7609	2	50	50	lof	2	2	5	100	50	500	5000	500000	500	500	1	2	2	0	0	0
6072	2	50	50	lof	1	2	5	100	50	500	5000	500000	500	500	1	2	2	0	0	0
7705	2	50	50	lof	2	2	5	100	50	500	5000	500000	500	500	1	2	2	0	0	0
7955	2	50	50	lof	2	2	5	100	50	500	5000	500000	500	500	1	2	2	0	0	0
6571	2	50	50	lof	1	2	5	100	50	500	5000	500000	500	500	1	2	2	0	0	0
8069	2	50	50	lof	3	2	5	100	50	500	5000	500000	500	500	1	2	2	0	0	0
7979	2	50	50	lof	2	2	5	100	50	500	5000	500000	500	500	1	2	2	0	0	0
7962	2	50	50	lof	2	2	5	100	50	500	5000	500000	500	500	1	2	2	0	0	0
7631	2	50	50	lof	2	2	5	100	50	500	5000	500000	500	500	1	2	2	0	0	0
7332	2	50	50	lof	2	2	5	100	50	500	5000	500000	500	500	1	2	2	0	0	0
7726	2	50	50	lof	2	2	5	100	50	500	5000	500000	500	500	1	2	2	0	0	0
7891	2	50	50	lof	2	2	5	100	50	500	5000	500000	500	500	1	2	2	0	0	0
8267	2	50	50	lof	3	2	5	100	50	500	5000	500000	500	500	1	2	2	0	0	0
8322	2	50	50	lof	3	2	5	100	50	500	5000	500000	500	500	1	2	2	0	0	0
8304	2	50	50	lof	3	2	5	100	50	500	5000	500000	500	500	1	2	2	0	0	0
8323	2	50	50	lof	3	2	5	100	50	500	5000	500000	500	500	1	2	2	0	0	0
8361	2	50	50	lof	3	2	5	100	50	500	5000	500000	500	500	1	2	2	0	0	0
8822	2	50	50	lof	3	2	5	100	50	500	5000	500000	500	500	1	2	2	0	0	0
8496	2	50	50	lof	3	2	5	100	50	500	5000	500000	500	500	1	2	2	0	0	0
8445	2	50	50	lof	3	2	5	100	50	500	5000	500000	500	500	1	2	2	0	0	0
8708	2	50	50	lof	3	2	5	100	50	500	5000	500000	500	500	1	2	2	0	0	0
8838	2	50	50	lof	3	2	5	100	50	500	5000	500000	500	500	1	2	2	0	0	0
8203	2	50	50	lof	3	2	5	100	50	500	5000	500000	500	500	1	2	2	0	0	0
8376	2	50	50	lof	3	2	5	100	50	500	5000	500000	500	500	1	2	2	0	0	0
8550	2	50	50	lof	3	2	5	100	50	500	5000	500000	500	500	1	2	2	0	0	0
7088	2	50	50	lof	2	2	5	100	50	500	5000	500000	500	500	1	2	2	0	0	0
8676	2	50	50	lof	3	2	5	100	50	500	5000	500000	500	500	1	2	2	0	0	0
8849	2	50	50	lof	3	2	5	100	50	500	5000	500000	500	500	1	2	2	0	0	0
8668	2	50	50	lof	3	2	5	100	50	500	5000	500000	500	500	1	2	2	0	0	0
8611	2	50	50	lof	3	2	5	100	50	500	5000	500000	500	500	1	2	2	0	0	0
8564	2	50	50	lof	3	2	5	100	50	500	5000	500000	500	500	1	2	2	0	0	0
6825	2	50	50	lof	1	2	5	100	50	500	5000	500000	500	500	1	2	2	0	0	0
6883	2	50	50	lof	1	2	5	100	50	500	5000	500000	500	500	1	2	2	0	0	0
7405	2	50	50	lof	2	2	5	100	50	500	5000	500000	500	500	1	2	2	0	0	0
8981	2	50	50	lof	3	2	5	100	50	500	5000	500000	500	500	1	2	2	0	0	0
8960	2	50	50	lof	3	2	5	100	50	500	5000	500000	500	500	1	2	2	0	0	0
8924	2	50	50	lof	3	2	5	100	50	500	5000	500000	500	500	1	2	2	0	0	0
7049	2	50	50	lof	2	2	5	100	50	500	5000	500000	500	500	1	2	2	0	0	0
9083	2	50	50	lof	4	2	5	100	50	500	5000	500000	500	500	1	2	2	0	0	0
7005	2	50	50	lof	2	2	5	100	50	500	5000	500000	500	500	1	2	2	0	0	0
9155	2	50	50	lof	4	2	5	100	50	500	5000	500000	500	500	1	2	2	0	0	0
9000	2	50	50	lof	3	2	5	100	50	500	5000	500000	500	500	1	2	2	0	0	0
9266	2	50	50	lof	4	2	5	100	50	500	5000	500000	500	500	1	2	2	0	0	0
9195	2	50	50	lof	4	2	5	100	50	500	5000	500000	500	500	1	2	2	0	0	0
8907	2	50	50	lof	3	2	5	100	50	500	5000	500000	500	500	1	2	2	0	0	0
9058	2	50	50	lof	4	2	5	100	50	500	5000	500000	500	500	1	2	2	0	0	0
9304	2	50	50	lof	4	2	5	100	50	500	5000	500000	500	500	1	2	2	0	0	0
8881	2	50	50	lof	3	2	5	100	50	500	5000	500000	500	500	1	2	2	0	0	0
9319	2	50	50	lof	4	2	5	100	50	500	5000	500000	500	500	1	2	2	0	0	0
9226	2	50	50	lof	4	2	5	100	50	500	5000	500000	500	500	1	2	2	0	0	0
9730	2	50	50	lof	4	2	5	100	50	500	5000	500000	500	500	1	2	2	0	0	0
9152	2	50	50	lof	4	2	5	100	50	500	5000	500000	500	500	1	2	2	0	0	0
9850	2	50	50	lof	4	2	5	100	50	500	5000	500000	500	500	1	2	2	0	0	0
9324	2	50	50	lof	4	2	5	100	50	500	5000	500000	500	500	1	2	2	0	0	0
9990	2	50	50	lof	4	2	5	100	50	500	5000	500000	500	500	1	2	2	0	0	0
10054	2	50	50	gof	0	2	5	100	50	500	5000	500000	500	500	1	2	2	0	0	0
9310	2	50	50	lof	4	2	5	100	50	500	5000	500000	500	500	1	2	2	0	0	0
9322	2	50	50	lof	4	2	5	100	50	500	5000	500000	500	500	1	2	2	0	0	0
9388	2	50	50	lof	4	2	5	100	50	500	5000	500000	500	500	1	2	2	0	0	0
9375	2	50	50	lof	4	2	5	100	50	500	5000	500000	500	500	1	2	2	0	0	0
9263	2	50	50	lof	4	2	5	100	50	500	5000	500000	500	500	1	2	2	0	0	0
9620	2	50	50	lof	4	2	5	100	50	500	5000	500000	500	500	1	2	2	0	0	0
9074	2	50	50	lof	4	2	5	100	50	500	5000	500000	500	500	1	2	2	0	0	0
9853	2	50	50	lof	4	2	5	100	50	500	5000	500000	500	500	1	2	2	0	0	0
9270	2	50	50	lof	4	2	5	100	50	500	5000	500000	500	500	1	2	2	0	0	0
10081	2	50	50	gof	0	2	5	100	50	500	5000	500000	500	500	1	2	2	0	0	0
9670	2	50	50	lof	4	2	5	100	50	500	5000	500000	500	500	1	2	2	0	0	0
8313	2	50	50	lof	3	2	5	100	50	500	5000	500000	500	500	1	2	2	0	0	0
9713	2	50	50	lof	4	2	5	100	50	500	5000	500000	500	500	1	2	2	0	0	0
9385	2	50	50	lof	4	2	5	100	50	500	5000	500000	500	500	1	2	2	0	0	0
9855	2	50	50	lof	4	2	5	100	50	500	5000	500000	500	500	1	2	2	0	0	0
10014	2	50	50	gof	0	2	5	100	50	500	5000	500000	500	500	1	2	2	0	0	0
9904	2	50	50	lof	4	2	5	100	50	500	5000	500000	500	500	1	2	2	0	0	0
9759	2	50	50	lof	4	2	5	100	50	500	5000	500000	500	500	1	2	2	0	0	0
10065	2	50	50	gof	0	2	5	100	50	500	5000	500000	500	500	1	2	2	0	0	0
9671	2	50	50	lof	4	2	5	100	50	500	5000	500000	500	500	1	2	2	0	0	0
10035	2	50	50	gof	0	2	5	100	50	500	5000	500000	500	500	1	2	2	0	0	0
10029	2	50	50	gof	0	2	5	100	50	500	5000	500000	500	500	1	2	2	0	0	0
9514	2	50	50	lof	4	2	5	100	50	500	5000	500000	500	500	1	2	2	0	0	0
9771	2	50	50	lof	4	2	5	100	50	500	5000	500000	500	500	1	2	2	0	0	0
8343	2	50	50	lof	3	2	5	100	50	500	5000	500000	500	500	1	2	2	0	0	0
9845	2	50	50	lof	4	2	5	100	50	500	5000	500000	500	500	1	2	2	0	0	0
10324	2	50	50	gof	0	2	5	100	50	500	5000	500000	500	500	1	2	2	0	0	0
10675	2	50	50	gof	0	2	5	100	50	500	5000	500000	500	500	1	2	2	0	0	0
10009	2	50	50	gof	0	2	5	100	50	500	5000	500000	500	500	1	2	2	0	0	0
10319	2	50	50	gof	0	2	5	100	50	500	5000	500000	500	500	1	2	2	0	0	0
10353	2	50	50	gof	0	2	5	100	50	500	5000	500000	500	500	1	2	2	0	0	0
10674	2	50	50	gof	0	2	5	100	50	500	5000	500000	500	500	1	2	2	0	0	0
10454	2	50	50	gof	0	2	5	100	50	500	5000	500000	500	500	1	2	2	0	0	0
7874	2	50	50	lof	2	2	5	100	50	500	5000	500000	500	500	1	2	2	0	0	0
10573	2	50	50	gof	0	2	5	100	50	500	5000	500000	500	500	1	2	2	0	0	0
10593	2	50	50	gof	0	2	5	100	50	500	5000	500000	500	500	1	2	2	0	0	0
9887	2	50	50	lof	4	2	5	100	50	500	5000	500000	500	500	1	2	2	0	0	0
10432	2	50	50	gof	0	2	5	100	50	500	5000	500000	500	500	1	2	2	0	0	0
10577	2	50	50	gof	0	2	5	100	50	500	5000	500000	500	500	1	2	2	0	0	0
10488	2	50	50	gof	0	2	5	100	50	500	5000	500000	500	500	1	2	2	0	0	0
10313	2	50	50	gof	0	2	5	100	50	500	5000	500000	500	500	1	2	2	0	0	0
10700	2	50	50	gof	0	2	5	100	50	500	5000	500000	500	500	1	2	2	0	0	0
10649	2	50	50	gof	0	2	5	100	50	500	5000	500000	500	500	1	2	2	0	0	0
9956	2	50	50	lof	4	2	5	100	50	500	5000	500000	500	500	1	2	2	0	0	0
10855	2	50	50	gof	0	2	5	100	50	500	5000	500000	500	500	1	2	2	0	0	0
10522	2	50	50	gof	0	2	5	100	50	500	5000	500000	500	500	1	2	2	0	0	0
10698	2	50	50	gof	0	2	5	100	50	500	5000	500000	500	500	1	2	2	0	0	0
11295	2	50	50	gof	1	2	5	100	50	500	5000	500000	500	500	1	2	2	0	0	0
10486	2	50	50	gof	0	2	5	100	50	500	5000	500000	500	500	1	2	2	0	0	0
10877	2	50	50	gof	0	2	5	100	50	500	5000	500000	500	500	1	2	2	0	0	0
10827	2	50	50	gof	0	2	5	100	50	500	5000	500000	500	500	1	2	2	0	0	0
9753	2	50	50	lof	4	2	5	100	50	500	5000	500000	500	500	1	2	2	0	0	0
8076	2	50	50	lof	3	2	5	100	50	500	5000	500000	500	500	1	2	2	0	0	0
11000	2	50	50	gof	0	2	5	100	50	500	5000	500000	500	500	1	2	2	0	0	0
10883	2	50	50	gof	0	2	5	100	50	500	5000	500000	500	500	1	2	2	0	0	0
11646	2	50	50	gof	1	2	5	100	50	500	5000	500000	500	500	1	2	2	0	0	0
11040	2	50	50	gof	1	2	5	100	50	500	5000	500000	500	500	1	2	2	0	0	0
10513	2	50	50	gof	0	2	5	100	50	500	5000	500000	500	500	1	2	2	0	0	0
10682	2	50	50	gof	0	2	5	100	50	500	5000	500000	500	500	1	2	2	0	0	0
11380	2	50	50	gof	1	2	5	100	50	500	5000	500000	500	500	1	2	2	0	0	0
11056	2	50	50	gof	1	2	5	100	50	500	5000	500000	500	500	1	2	2	0	0	0
11230	2	50	50	gof	1	2	5	100	50	500	5000	500000	500	500	1	2	2	0	0	0
11470	2	50	50	gof	1	2	5	100	50	500	5000	500000	500	500	1	2	2	0	0	0
10735	2	50	50	gof	0	2	5	100	50	500	5000	500000	500	500	1	2	2	0	0	0
10690	2	50	50	gof	0	2	5	100	50	500	5000	500000	500	500	1	2	2	0	0	0
11239	2	50	50	gof	1	2	5	100	50	500	5000	500000	500	500	1	2	2	0	0	0
10976	2	50	50	gof	0	2	5	100	50	500	5000	500000	500	500	1	2	2	0	0	0
11467	2	50	50	gof	1	2	5	100	50	500	5000	500000	500	500	1	2	2	0	0	0
10876	2	50	50	gof	0	2	5	100	50	500	5000	500000	500	500	1	2	2	0	0	0
10912	2	50	50	gof	0	2	5	100	50	500	5000	500000	500	500	1	2	2	0	0	0
11115	2	50	50	gof	1	2	5	100	50	500	5000	500000	500	500	1	2	2	0	0	0
11802	2	50	50	gof	1	2	5	100	50	500	5000	500000	500	500	1	2	2	0	0	0
11699	2	50	50	gof	1	2	5	100	50	500	5000	500000	500	500	1	2	2	0	0	0
11288	2	50	50	gof	1	2	5	100	50	500	5000	500000	500	500	1	2	2	0	0	0
10810	2	50	50	gof	0	2	5	100	50	500	5000	500000	500	500	1	2	2	0	0	0
12116	2	50	50	gof	2	2	5	100	50	500	5000	500000	500	500	1	2	2	0	0	0
11901	2	50	50	gof	1	2	5	100	50	500	5000	500000	500	500	1	2	2	0	0	0
11528	2	50	50	gof	1	2	5	100	50	500	5000	500000	500	500	1	2	2	0	0	0
11930	2	50	50	gof	1	2	5	100	50	500	5000	500000	500	500	1	2	2	0	0	0
11696	2	50	50	gof	1	2	5	100	50	500	5000	500000	500	500	1	2	2	0	0	0
12006	2	50	50	gof	2	2	5	100	50	500	5000	500000	500	500	1	2	2	0	0	0
11727	2	50	50	gof	1	2	5	100	50	500	5000	500000	500	500	1	2	2	0	0	0
11848	2	50	50	gof	1	2	5	100	50	500	5000	500000	500	500	1	2	2	0	0	0
11638	2	50	50	gof	1	2	5	100	50	500	5000	500000	500	500	1	2	2	0	0	0
12158	2	50	50	gof	2	2	5	100	50	500	5000	500000	500	500	1	2	2	0	0	0
11107	2	50	50	gof	1	2	5	100	50	500	5000	500000	500	500	1	2	2	0	0	0
11836	2	50	50	gof	1	2	5	100	50	500	5000	500000	500	500	1	2	2	0	0	0
12256	2	50	50	gof	2	2	5	100	50	500	5000	500000	500	500	1	2	2	0	0	0
9810	2	50	50	lof	4	2	5	100	50	500	5000	500000	500	500	1	2	2	0	0	0
12110	2	50	50	gof	2	2	5	100	50	500	5000	500000	500	500	1	2	2	0	0	0
11314	2	50	50	gof	1	2	5	100	50	500	5000	500000	500	500	1	2	2	0	0	0
12189	2	50	50	gof	2	2	5	100	50	500	5000	500000	500	500	1	2	2	0	0	0
8912	2	50	50	lof	3	2	5	100	50	500	5000	500000	500	500	1	2	2	0	0	0
12447	2	50	50	gof	2	2	5	100	50	500	5000	500000	500	500	1	2	2	0	0	0
12440	2	50	50	gof	2	2	5	100	50	500	5000	500000	500	500	1	2	2	0	0	0
12649	2	50	50	gof	2	2	5	100	50	500	5000	500000	500	500	1	2	2	0	0	0
12140	2	50	50	gof	2	2	5	100	50	500	5000	500000	500	500	1	2	2	0	0	0
12833	2	50	50	gof	2	2	5	100	50	500	5000	500000	500	500	1	2	2	0	0	0
11748	2	50	50	gof	1	2	5	100	50	500	5000	500000	500	500	1	2	2	0	0	0
12366	2	50	50	gof	2	2	5	100	50	500	5000	500000	500	500	1	2	2	0	0	0
8972	2	50	50	lof	3	2	5	100	50	500	5000	500000	500	500	1	2	2	0	0	0
12624	2	50	50	gof	2	2	5	100	50	500	5000	500000	500	500	1	2	2	0	0	0
12616	2	50	50	gof	2	2	5	100	50	500	5000	500000	500	500	1	2	2	0	0	0
12828	2	50	50	gof	2	2	5	100	50	500	5000	500000	500	500	1	2	2	0	0	0
12752	2	50	50	gof	2	2	5	100	50	500	5000	500000	500	500	1	2	2	0	0	0
12429	2	50	50	gof	2	2	5	100	50	500	5000	500000	500	500	1	2	2	0	0	0
13275	2	50	50	gof	3	2	5	100	50	500	5000	500000	500	500	1	2	2	0	0	0
12367	2	50	50	gof	2	2	5	100	50	500	5000	500000	500	500	1	2	2	0	0	0
12748	2	50	50	gof	2	2	5	100	50	500	5000	500000	500	500	1	2	2	0	0	0
12775	2	50	50	gof	2	2	5	100	50	500	5000	500000	500	500	1	2	2	0	0	0
12662	2	50	50	gof	2	2	5	100	50	500	5000	500000	500	500	1	2	2	0	0	0
13110	2	50	50	gof	3	2	5	100	50	500	5000	500000	500	500	1	2	2	0	0	0
12226	2	50	50	gof	2	2	5	100	50	500	5000	500000	500	500	1	2	2	0	0	0
12710	2	50	50	gof	2	2	5	100	50	500	5000	500000	500	500	1	2	2	0	0	0
12656	2	50	50	gof	2	2	5	100	50	500	5000	500000	500	500	1	2	2	0	0	0
12578	2	50	50	gof	2	2	5	100	50	500	5000	500000	500	500	1	2	2	0	0	0
12112	2	50	50	gof	2	2	5	100	50	500	5000	500000	500	500	1	2	2	0	0	0
12308	2	50	50	gof	2	2	5	100	50	500	5000	500000	500	500	1	2	2	0	0	0
11606	2	50	50	gof	1	2	5	100	50	500	5000	500000	500	500	1	2	2	0	0	0
12918	2	50	50	gof	2	2	5	100	50	500	5000	500000	500	500	1	2	2	0	0	0
12370	2	50	50	gof	2	2	5	100	50	500	5000	500000	500	500	1	2	2	0	0	0
12334	2	50	50	gof	2	2	5	100	50	500	5000	500000	500	500	1	2	2	0	0	0
12951	2	50	50	gof	2	2	5	100	50	500	5000	500000	500	500	1	2	2	0	0	0
12790	2	50	50	gof	2	2	5	100	50	500	5000	500000	500	500	1	2	2	0	0	0
12178	2	50	50	gof	2	2	5	100	50	500	5000	500000	500	500	1	2	2	0	0	0
12911	2	50	50	gof	2	2	5	100	50	500	5000	500000	500	500	1	2	2	0	0	0
12882	2	50	50	gof	2	2	5	100	50	500	5000	500000	500	500	1	2	2	0	0	0
13465	2	50	50	gof	3	2	5	100	50	500	5000	500000	500	500	1	2	2	0	0	0
11326	2	50	50	gof	1	2	5	100	50	500	5000	500000	500	500	1	2	2	0	0	0
12553	2	50	50	gof	2	2	5	100	50	500	5000	500000	500	500	1	2	2	0	0	0
13271	2	50	50	gof	3	2	5	100	50	500	5000	500000	500	500	1	2	2	0	0	0
13116	2	50	50	gof	3	2	5	100	50	500	5000	500000	500	500	1	2	2	0	0	0
13215	2	50	50	gof	3	2	5	100	50	500	5000	500000	500	500	1	2	2	0	0	0
13605	2	50	50	gof	3	2	5	100	50	500	5000	500000	500	500	1	2	2	0	0	0
13330	2	50	50	gof	3	2	5	100	50	500	5000	500000	500	500	1	2	2	0	0	0
13194	2	50	50	gof	3	2	5	100	50	500	5000	500000	500	500	1	2	2	0	0	0
13589	2	50	50	gof	3	2	5	100	50	500	5000	500000	500	500	1	2	2	0	0	0
13139	2	50	50	gof	3	2	5	100	50	500	5000	500000	500	500	1	2	2	0	0	0
13484	2	50	50	gof	3	2	5	100	50	500	5000	500000	500	500	1	2	2	0	0	0
13774	2	50	50	gof	3	2	5	100	50	500	5000	500000	500	500	1	2	2	0	0	0
13574	2	50	50	gof	3	2	5	100	50	500	5000	500000	500	500	1	2	2	0	0	0
13691	2	50	50	gof	3	2	5	100	50	500	5000	500000	500	500	1	2	2	0	0	0
13811	2	50	50	gof	3	2	5	100	50	500	5000	500000	500	500	1	2	2	0	0	0
13326	2	50	50	gof	3	2	5	100	50	500	5000	500000	500	500	1	2	2	0	0	0
13790	2	50	50	gof	3	2	5	100	50	500	5000	500000	500	500	1	2	2	0	0	0
13756	2	50	50	gof	3	2	5	100	50	500	5000	500000	500	500	1	2	2	0	0	0
13938	2	50	50	gof	3	2	5	100	50	500	5000	500000	500	500	1	2	2	0	0	0
14048	2	50	50	gof	4	2	5	100	50	500	5000	500000	500	500	1	2	2	0	0	0
13905	2	50	50	gof	3	2	5	100	50	500	5000	500000	500	500	1	2	2	0	0	0
13910	2	50	50	gof	3	2	5	100	50	500	5000	500000	500	500	1	2	2	0	0	0
13669	2	50	50	gof	3	2	5	100	50	500	5000	500000	500	500	1	2	2	0	0	0
14146	2	50	50	gof	4	2	5	100	50	500	5000	500000	500	500	1	2	2	0	0	0
13886	2	50	50	gof	3	2	5	100	50	500	5000	500000	500	500	1	2	2	0	0	0
14030	2	50	50	gof	4	2	5	100	50	500	5000	500000	500	500	1	2	2	0	0	0
14174	2	50	50	gof	4	2	5	100	50	500	5000	500000	500	500	1	2	2	0	0	0
14015	2	50	50	gof	4	2	5	100	50	500	5000	500000	500	500	1	2	2	0	0	0
14110	2	50	50	gof	4	2	5	100	50	500	5000	500000	500	500	1	2	2	0	0	0
13922	2	50	50	gof	3	2	5	100	50	500	5000	500000	500	500	1	2	2	0	0	0
14141	2	50	50	gof	4	2	5	100	50	500	5000	500000	500	500	1	2	2	0	0	0
13888	2	50	50	gof	3	2	5	100	50	500	5000	500000	500	500	1	2	2	0	0	0
14485	2	50	50	gof	4	2	5	100	50	500	5000	500000	500	500	1	2	2	0	0	0
14299	2	50	50	gof	4	2	5	100	50	500	5000	500000	500	500	1	2	2	0	0	0
14235	2	50	50	gof	4	2	5	100	50	500	5000	500000	500	500	1	2	2	0	0	0
14189	2	50	50	gof	4	2	5	100	50	500	5000	500000	500	500	1	2	2	0	0	0
14391	2	50	50	gof	4	2	5	100	50	500	5000	500000	500	500	1	2	2	0	0	0
14490	2	50	50	gof	4	2	5	100	50	500	5000	500000	500	500	1	2	2	0	0	0
13806	2	50	50	gof	3	2	5	100	50	500	5000	500000	500	500	1	2	2	0	0	0
14829	2	50	50	gof	4	2	5	100	50	500	5000	500000	500	500	1	2	2	0	0	0
12855	2	50	50	gof	2	2	5	100	50	500	5000	500000	500	500	1	2	2	0	0	0
14495	2	50	50	gof	4	2	5	100	50	500	5000	500000	500	500	1	2	2	0	0	0
14439	2	50	50	gof	4	2	5	100	50	500	5000	500000	500	500	1	2	2	0	0	0
14254	2	50	50	gof	4	2	5	100	50	500	5000	500000	500	500	1	2	2	0	0	0
14610	2	50	50	gof	4	2	5	100	50	500	5000	500000	500	500	1	2	2	0	0	0
14642	2	50	50	gof	4	2	5	100	50	500	5000	500000	500	500	1	2	2	0	0	0
14359	2	50	50	gof	4	2	5	100	50	500	5000	500000	500	500	1	2	2	0	0	0
14323	2	50	50	gof	4	2	5	100	50	500	5000	500000	500	500	1	2	2	0	0	0
15066	3	50	50	none	0	2	5	100	50	500	5000	500000	500	500	1	2	2	0	0	0
15034	3	50	50	none	0	2	5	100	50	500	5000	500000	500	500	1	2	2	0	0	0
12576	2	50	50	gof	2	2	5	100	50	500	5000	500000	500	500	1	2	2	0	0	0
14866	2	50	50	gof	4	2	5	100	50	500	5000	500000	500	500	1	2	2	0	0	0
15002	3	50	50	none	0	2	5	100	50	500	5000	500000	500	500	1	3	4	0	0	0
14896	2	50	50	gof	4	2	5	100	50	500	5000	500000	500	500	1	2	2	0	0	0
14062	2	50	50	gof	4	2	5	100	50	500	5000	500000	500	500	1	2	2	0	0	0
14417	2	50	50	gof	4	2	5	100	50	500	5000	500000	500	500	1	2	2	0	0	0
15058	3	50	50	none	0	2	5	100	50	500	5000	500000	500	500	1	2	2	0	0	0
15159	3	50	50	none	0	2	5	100	50	500	5000	500000	500	500	1	3	4	0	0	0
15001	3	50	50	none	0	2	5	100	50	500	5000	500000	500	500	1	3	3	0	0	0
15122	3	50	50	none	0	2	5	100	50	500	5000	500000	500	500	1	2	2	0	0	0
14967	2	50	50	gof	4	2	5	100	50	500	5000	500000	500	500	1	2	2	0	0	0
15161	3	50	50	none	0	2	5	100	50	500	5000	500000	500	500	1	2	2	0	0	0
15120	3	50	50	none	0	2	5	100	50	500	5000	500000	500	500	1	2	2	0	0	0
15230	3	50	50	none	0	2	5	100	50	500	5000	500000	500	500	1	2	2	0	0	0
15212	3	50	50	none	0	2	5	100	50	500	5000	500000	500	500	1	2	2	0	1	1
15099	3	50	50	none	0	2	5	100	50	500	5000	500000	500	500	1	2	2	0	0	0
15130	3	50	50	none	0	2	5	100	50	500	5000	500000	500	500	1	3	5	0	0	0
14762	2	50	50	gof	4	2	5	100	50	500	5000	500000	500	500	1	2	2	0	0	0
15328	3	50	50	none	0	2	5	100	50	500	5000	500000	500	500	1	3	5	0	0	0
15311	3	50	50	none	0	2	5	100	50	500	5000	500000	500	500	1	2	2	0	0	0
15302	3	50	50	none	0	2	5	100	50	500	5000	500000	500	500	1	3	4	0	0	0
15062	3	50	50	none	0	2	5	100	50	500	5000	500000	500	500	1	2	2	0	0	0
15321	3	50	50	none	0	2	5	100	50	500	5000	500000	500	500	1	2	2	0	0	0
14986	2	50	50	gof	4	2	5	100	50	500	5000	500000	500	500	1	2	2	0	0	0
15468	3	50	50	none	0	2	5	100	50	500	5000	500000	500	500	1	2	2	0	0	0
15320	3	50	50	none	0	2	5	100	50	500	5000	500000	500	500	1	3	3	0	0	0
15010	3	50	50	none	0	2	5	100	50	500	5000	500000	500	500	1	2	2	0	0	0
11253	2	50	50	gof	1	2	5	100	50	500	5000	500000	500	500	1	2	2	0	0	0
15456	3	50	50	none	0	2	5	100	50	500	5000	500000	500	500	1	2	2	0	0	0
15307	3	50	50	none	0	2	5	100	50	500	5000	500000	500	500	1	2	2	0	0	0
15416	3	50	50	none	0	2	5	100	50	500	5000	500000	500	500	1	2	2	0	0	0
15310	3	50	50	none	0	2	5	100	50	500	5000	500000	500	500	1	2	2	0	0	0
15231	3	50	50	none	0	2	5	100	50	500	5000	500000	500	500	1	2	2	0	0	0
14648	2	50	50	gof	4	2	5	100	50	500	5000	500000	500	500	1	2	2	0	0	0
15517	3	50	50	none	0	2	5	100	50	500	5000	500000	500	500	1	2	2	0	0	0
15466	3	50	50	none	0	2	5	100	50	500	5000	500000	500	500	1	3	4	1	0	0
15515	3	50	50	none	0	2	5	100	50	500	5000	500000	500	500	1	2	2	0	0	0
15533	3	50	50	none	0	2	5	100	50	500	5000	500000	500	500	1	2	2	0	0	0
15134	3	50	50	none	0	2	5	100	50	500	5000	500000	500	500	1	2	2	0	0	0
14817	2	50	50	gof	4	2	5	100	50	500	5000	500000	500	500	1	2	2	0	0	0
15560	3	50	50	none	0	2	5	100	50	500	5000	500000	500	500	1	2	2	0	0	0
15562	3	50	50	none	0	2	5	100	50	500	5000	500000	500	500	1	3	4	0	0	0
14847	2	50	50	gof	4	2	5	100	50	500	5000	500000	500	500	1	2	2	0	0	0
15149	3	50	50	none	0	2	5	100	50	500	5000	500000	500	500	1	2	2	0	0	0
15511	3	50	50	none	0	2	5	100	50	500	5000	500000	500	500	1	2	2	0	0	0
15489	3	50	50	none	0	2	5	100	50	500	5000	500000	500	500	1	3	4	0	0	0
15452	3	50	50	none	0	2	5	100	50	500	5000	500000	500	500	1	2	2	0	0	0
13575	2	50	50	gof	3	2	5	100	50	500	5000	500000	500	500	1	2	2	0	0	0
15371	3	50	50	none	0	2	5	100	50	500	5000	500000	500	500	1	2	2	0	0	0
15393	3	50	50	none	0	2	5	100	50	500	5000	500000	500	500	1	2	2	0	0	0
15454	3	50	50	none	0	2	5	100	50	500	5000	500000	500	500	1	2	2	0	0	0
13998	2	50	50	gof	3	2	5	100	50	500	5000	500000	500	500	1	2	2	0	0	0
15568	3	50	50	none	0	2	5	100	50	500	5000	500000	500	500	1	3	6	0	0	0
15570	3	50	50	none	0	2	5	100	50	500	5000	500000	500	500	1	2	2	0	0	0
15278	3	50	50	none	0	2	5	100	50	500	5000	500000	500	500	1	3	4	0	0	0
15235	3	50	50	none	0	2	5	100	50	500	5000	500000	500	500	1	3	3	0	0	0
15612	3	50	50	none	0	2	5	100	50	500	5000	500000	500	500	1	2	2	0	0	0
15797	3	50	50	none	0	2	5	100	50	500	5000	500000	500	500	1	2	2	0	0	0
15611	3	50	50	none	0	2	5	100	50	500	5000	500000	500	500	1	3	3	0	0	0
15542	3	50	50	none	0	2	5	100	50	500	5000	500000	500	500	1	3	3	0	0	0
15580	3	50	50	none	0	2	5	100	50	500	5000	500000	500	500	1	2	2	0	0	0
15096	3	50	50	none	0	2	5	100	50	500	5000	500000	500	500	1	3	4	0	0	0
15532	3	50	50	none	0	2	5	100	50	500	5000	500000	500	500	1	2	2	0	0	0
15584	3	50	50	none	0	2	5	100	50	500	5000	500000	500	500	1	2	2	0	0	0
15762	3	50	50	none	0	2	5	100	50	500	5000	500000	500	500	1	2	2	0	0	0
15596	3	50	50	none	0	2	5	100	50	500	5000	500000	500	500	1	2	2	0	0	0
15843	3	50	50	none	0	2	5	100	50	500	5000	500000	500	500	1	2	2	0	0	0
15601	3	50	50	none	0	2	5	100	50	500	5000	500000	500	500	1	2	2	0	0	0
15759	3	50	50	none	0	2	5	100	50	500	5000	500000	500	500	1	2	2	0	0	0
15785	3	50	50	none	0	2	5	100	50	500	5000	500000	500	500	1	2	2	0	0	0
15775	3	50	50	none	0	2	5	100	50	500	5000	500000	500	500	1	2	2	0	0	0
15730	3	50	50	none	0	2	5	100	50	500	5000	500000	500	500	1	2	2	0	0	0
16016	3	50	50	none	1	2	5	100	50	500	5000	500000	500	500	1	3	3	0	0	0
15586	3	50	50	none	0	2	5	100	50	500	5000	500000	500	500	1	2	2	0	0	0
15915	3	50	50	none	0	2	5	100	50	500	5000	500000	500	500	1	2	2	0	0	0
15041	3	50	50	none	0	2	5	100	50	500	5000	500000	500	500	1	3	3	0	0	0
16079	3	50	50	none	1	2	5	100	50	500	5000	500000	500	500	1	2	2	0	0	0
16017	3	50	50	none	1	2	5	100	50	500	5000	500000	500	500	1	2	2	0	0	0
16092	3	50	50	none	1	2	5	100	50	500	5000	500000	500	500	1	3	3	0	0	0
15821	3	50	50	none	0	2	5	100	50	500	5000	500000	500	500	1	2	2	0	0	0
16041	3	50	50	none	1	2	5	100	50	500	5000	500000	500	500	1	2	2	0	0	0
15815	3	50	50	none	0	2	5	100	50	500	5000	500000	500	500	1	2	2	0	1	1
15650	3	50	50	none	0	2	5	100	50	500	5000	500000	500	500	1	3	4	0	0	0
15171	3	50	50	none	0	2	5	100	50	500	5000	500000	500	500	1	3	4	0	0	0
15082	3	50	50	none	0	2	5	100	50	500	5000	500000	500	500	1	2	2	0	0	0
15870	3	50	50	none	0	2	5	100	50	500	5000	500000	500	500	1	2	2	0	0	0
16073	3	50	50	none	1	2	5	100	50	500	5000	500000	500	500	1	3	3	0	0	0
16031	3	50	50	none	1	2	5	100	50	500	5000	500000	500	500	1	2	2	0	0	0
15335	3	50	50	none	0	2	5	100	50	500	5000	500000	500	500	1	2	2	0	0	0
16134	3	50	50	none	1	2	5	100	50	500	5000	500000	500	500	1	2	2	0	0	0
16103	3	50	50	none	1	2	5	100	50	500	5000	500000	500	500	1	2	2	0	0	0
16135	3	50	50	none	1	2	5	100	50	500	5000	500000	500	500	1	2	2	0	0	0
16000	3	50	50	none	0	2	5	100	50	500	5000	500000	500	500	1	2	2	0	0	0
15293	3	50	50	none	0	2	5	100	50	500	5000	500000	500	500	1	2	2	0	0	0
16282	3	50	50	none	1	2	5	100	50	500	5000	500000	500	500	1	2	2	0	0	0
16062	3	50	50	none	1	2	5	100	50	500	5000	500000	500	500	1	2	2	0	0	0
16183	3	50	50	none	1	2	5	100	50	500	5000	500000	500	500	1	2	2	0	0	0
16192	3	50	50	none	1	2	5	100	50	500	5000	500000	500	500	1	3	5	0	0	0
15685	3	50	50	none	0	2	5	100	50	500	5000	500000	500	500	1	3	3	0	0	0
16157	3	50	50	none	1	2	5	100	50	500	5000	500000	500	500	1	2	2	0	0	0
16200	3	50	50	none	1	2	5	100	50	500	5000	500000	500	500	1	2	2	0	0	0
16332	3	50	50	none	1	2	5	100	50	500	5000	500000	500	500	1	2	2	0	0	0
16251	3	50	50	none	1	2	5	100	50	500	5000	500000	500	500	1	3	4	0	0	0
15373	3	50	50	none	0	2	5	100	50	500	5000	500000	500	500	1	2	2	0	0	0
16078	3	50	50	none	1	2	5	100	50	500	5000	500000	500	500	1	2	2	0	0	0
16350	3	50	50	none	1	2	5	100	50	500	5000	500000	500	500	1	2	2	0	0	0
16259	3	50	50	none	1	2	5	100	50	500	5000	500000	500	500	1	2	2	0	0	0
16182	3	50	50	none	1	2	5	100	50	500	5000	500000	500	500	1	3	5	0	0	0
16262	3	50	50	none	1	2	5	100	50	500	5000	500000	500	500	1	2	2	0	0	0
16395	3	50	50	none	1	2	5	100	50	500	5000	500000	500	500	1	2	2	0	0	0
16317	3	50	50	none	1	2	5	100	50	500	5000	500000	500	500	1	2	2	0	0	0
15868	3	50	50	none	0	2	5	100	50	500	5000	500000	500	500	1	3	4	0	0	0
16437	3	50	50	none	1	2	5	100	50	500	5000	500000	500	500	1	2	2	0	0	0
16220	3	50	50	none	1	2	5	100	50	500	5000	500000	500	500	1	3	4	0	0	0
16373	3	50	50	none	1	2	5	100	50	500	5000	500000	500	500	1	2	2	0	0	0
16448	3	50	50	none	1	2	5	100	50	500	5000	500000	500	500	1	2	2	0	0	0
16404	3	50	50	none	1	2	5	100	50	500	5000	500000	500	500	1	2	2	0	0	0
16478	3	50	50	none	1	2	5	100	50	500	5000	500000	500	500	1	3	3	0	0	0
15923	3	50	50	none	0	2	5	100	50	500	5000	500000	500	500	1	3	4	0	0	0
15591	3	50	50	none	0	2	5	100	50	500	5000	500000	500	500	1	2	2	0	0	0
16268	3	50	50	none	1	2	5	100	50	500	5000	500000	500	500	1	2	2	0	0	0
16378	3	50	50	none	1	2	5	100	50	500	5000	500000	500	500	1	2	2	0	0	0
15997	3	50	50	none	0	2	5	100	50	500	5000	500000	500	500	1	2	2	0	1	1
16509	3	50	50	none	1	2	5	100	50	500	5000	500000	500	500	1	2	2	0	0	0
16435	3	50	50	none	1	2	5	100	50	500	5000	500000	500	500	1	2	2	0	0	0
16356	3	50	50	none	1	2	5	100	50	500	5000	500000	500	500	1	2	2	0	0	0
16275	3	50	50	none	1	2	5	100	50	500	5000	500000	500	500	1	2	2	0	0	0
16294	3	50	50	none	1	2	5	100	50	500	5000	500000	500	500	1	3	3	0	0	0
15786	3	50	50	none	0	2	5	100	50	500	5000	500000	500	500	1	3	4	0	0	0
16501	3	50	50	none	1	2	5	100	50	500	5000	500000	500	500	1	3	3	0	0	0
15726	3	50	50	none	0	2	5	100	50	500	5000	500000	500	500	1	2	2	0	0	0
16517	3	50	50	none	1	2	5	100	50	500	5000	500000	500	500	1	3	4	0	0	0
16465	3	50	50	none	1	2	5	100	50	500	5000	500000	500	500	1	2	2	0	0	0
16400	3	50	50	none	1	2	5	100	50	500	5000	500000	500	500	1	3	4	0	0	0
16594	3	50	50	none	1	2	5	100	50	500	5000	500000	500	500	1	2	2	0	0	0
16512	3	50	50	none	1	2	5	100	50	500	5000	500000	500	500	1	2	2	0	0	0
16298	3	50	50	none	1	2	5	100	50	500	5000	500000	500	500	1	2	2	0	0	0
16499	3	50	50	none	1	2	5	100	50	500	5000	500000	500	500	1	2	2	0	0	0
16553	3	50	50	none	1	2	5	100	50	500	5000	500000	500	500	1	2	2	0	0	0
16372	3	50	50	none	1	2	5	100	50	500	5000	500000	500	500	1	2	2	0	0	0
15802	3	50	50	none	0	2	5	100	50	500	5000	500000	500	500	1	2	2	0	0	0
16521	3	50	50	none	1	2	5	100	50	500	5000	500000	500	500	1	3	3	0	0	0
16532	3	50	50	none	1	2	5	100	50	500	5000	500000	500	500	1	3	4	1	0	0
16641	3	50	50	none	1	2	5	100	50	500	5000	500000	500	500	1	2	2	0	0	0
16615	3	50	50	none	1	2	5	100	50	500	5000	500000	500	500	1	2	2	0	0	0
16560	3	50	50	none	1	2	5	100	50	500	5000	500000	500	500	1	2	2	0	0	0
16583	3	50	50	none	1	2	5	100	50	500	5000	500000	500	500	1	2	2	0	0	0
16579	3	50	50	none	1	2	5	100	50	500	5000	500000	500	500	1	2	2	0	0	0
16649	3	50	50	none	1	2	5	100	50	500	5000	500000	500	500	1	2	2	0	0	0
16552	3	50	50	none	1	2	5	100	50	500	5000	500000	500	500	1	3	5	0	0	0
16807	3	50	50	none	1	2	5	100	50	500	5000	500000	500	500	1	2	2	0	0	0
16882	3	50	50	none	1	2	5	100	50	500	5000	500000	500	500	1	2	2	0	0	0
16590	3	50	50	none	1	2	5	100	50	500	5000	500000	500	500	1	2	2	0	0	0
16756	3	50	50	none	1	2	5	100	50	500	5000	500000	500	500	1	2	2	0	0	0
16722	3	50	50	none	1	2	5	100	50	500	5000	500000	500	500	1	2	2	0	0	0
16838	3	50	50	none	1	2	5	100	50	500	5000	500000	500	500	1	2	2	0	0	0
16664	3	50	50	none	1	2	5	100	50	500	5000	500000	500	500	1	2	2	0	0	0
16804	3	50	50	none	1	2	5	100	50	500	5000	500000	500	500	1	3	4	0	0	0
16598	3	50	50	none	1	2	5	100	50	500	5000	500000	500	500	1	2	2	0	0	0
16828	3	50	50	none	1	2	5	100	50	500	5000	500000	500	500	1	2	2	0	0	0
16599	3	50	50	none	1	2	5	100	50	500	5000	500000	500	500	1	2	2	0	0	0
16785	3	50	50	none	1	2	5	100	50	500	5000	500000	500	500	1	2	2	0	0	0
16343	3	50	50	none	1	2	5	100	50	500	5000	500000	500	500	1	2	2	0	0	0
16660	3	50	50	none	1	2	5	100	50	500	5000	500000	500	500	1	2	2	0	0	0
16836	3	50	50	none	1	2	5	100	50	500	5000	500000	500	500	1	2	2	0	0	0
16844	3	50	50	none	1	2	5	100	50	500	5000	500000	500	500	1	3	3	0	0	0
16692	3	50	50	none	1	2	5	100	50	500	5000	500000	500	500	1	2	2	0	0	0
16555	3	50	50	none	1	2	5	100	50	500	5000	500000	500	500	1	2	2	0	0	0
17115	3	50	50	none	2	2	5	100	50	500	5000	500000	500	500	1	2	2	0	0	0
16760	3	50	50	none	1	2	5	100	50	500	5000	500000	500	500	1	2	2	0	0	0
16348	3	50	50	none	1	2	5	100	50	500	5000	500000	500	500	1	2	2	0	0	0
16908	3	50	50	none	1	2	5	100	50	500	5000	500000	500	500	1	3	3	1	0	0
16703	3	50	50	none	1	2	5	100	50	500	5000	500000	500	500	1	2	2	0	0	0
16895	3	50	50	none	1	2	5	100	50	500	5000	500000	500	500	1	2	2	0	0	0
16948	3	50	50	none	1	2	5	100	50	500	5000	500000	500	500	1	2	2	0	0	0
17144	3	50	50	none	2	2	5	100	50	500	5000	500000	500	500	1	2	2	0	0	0
15902	3	50	50	none	0	2	5	100	50	500	5000	500000	500	500	1	2	2	0	0	0
16917	3	50	50	none	1	2	5	100	50	500	5000	500000	500	500	1	2	2	0	0	0
16963	3	50	50	none	1	2	5	100	50	500	5000	500000	500	500	1	2	2	0	0	0
16010	3	50	50	none	1	2	5	100	50	500	5000	500000	500	500	1	2	2	0	0	0
16924	3	50	50	none	1	2	5	100	50	500	5000	500000	500	500	1	3	4	0	0	0
16614	3	50	50	none	1	2	5	100	50	500	5000	500000	500	500	1	2	2	0	0	0
16674	3	50	50	none	1	2	5	100	50	500	5000	500000	500	500	1	3	4	0	0	0
16302	3	50	50	none	1	2	5	100	50	500	5000	500000	500	500	1	2	2	0	0	0
17067	3	50	50	none	2	2	5	100	50	500	5000	500000	500	500	1	2	2	0	0	0
16980	3	50	50	none	1	2	5	100	50	500	5000	500000	500	500	1	2	2	0	0	0
16650	3	50	50	none	1	2	5	100	50	500	5000	500000	500	500	1	3	4	0	0	0
16972	3	50	50	none	1	2	5	100	50	500	5000	500000	500	500	1	2	2	0	1	1
17087	3	50	50	none	2	2	5	100	50	500	5000	500000	500	500	1	2	2	0	0	0
16542	3	50	50	none	1	2	5	100	50	500	5000	500000	500	500	1	2	2	0	0	0
17137	3	50	50	none	2	2	5	100	50	500	5000	500000	500	500	1	2	2	0	0	0
16961	3	50	50	none	1	2	5	100	50	500	5000	500000	500	500	1	2	2	0	0	0
17098	3	50	50	none	2	2	5	100	50	500	5000	500000	500	500	1	2	2	0	0	0
17009	3	50	50	none	2	2	5	100	50	500	5000	500000	500	500	1	3	4	0	0	0
17085	3	50	50	none	2	2	5	100	50	500	5000	500000	500	500	1	3	4	0	0	0
17032	3	50	50	none	2	2	5	100	50	500	5000	500000	500	500	1	2	2	0	0	0
17155	3	50	50	none	2	2	5	100	50	500	5000	500000	500	500	1	2	2	0	0	0
16999	3	50	50	none	1	2	5	100	50	500	5000	500000	500	500	1	3	3	0	0	0
16426	3	50	50	none	1	2	5	100	50	500	5000	500000	500	500	1	2	2	0	0	0
16301	3	50	50	none	1	2	5	100	50	500	5000	500000	500	500	1	2	2	0	0	0
17161	3	50	50	none	2	2	5	100	50	500	5000	500000	500	500	1	2	2	0	0	0
17163	3	50	50	none	2	2	5	100	50	500	5000	500000	500	500	1	2	2	0	0	0
17164	3	50	50	none	2	2	5	100	50	500	5000	500000	500	500	1	3	3	1	0	0
17325	3	50	50	none	2	2	5	100	50	500	5000	500000	500	500	1	3	3	1	0	0
17240	3	50	50	none	2	2	5	100	50	500	5000	500000	500	500	1	3	3	0	0	0
17242	3	50	50	none	2	2	5	100	50	500	5000	500000	500	500	1	2	2	0	0	0
17264	3	50	50	none	2	2	5	100	50	500	5000	500000	500	500	1	2	2	0	0	0
16566	3	50	50	none	1	2	5	100	50	500	5000	500000	500	500	1	2	2	0	0	0
17227	3	50	50	none	2	2	5	100	50	500	5000	500000	500	500	1	2	2	0	0	0
17237	3	50	50	none	2	2	5	100	50	500	5000	500000	500	500	1	3	3	0	0	0
17177	3	50	50	none	2	2	5	100	50	500	5000	500000	500	500	1	3	3	0	0	0
17268	3	50	50	none	2	2	5	100	50	500	5000	500000	500	500	1	2	2	0	0	0
17156	3	50	50	none	2	2	5	100	50	500	5000	500000	500	500	1	2	2	0	0	0
17367	3	50	50	none	2	2	5	100	50	500	5000	500000	500	500	1	3	4	1	0	0
17516	3	50	50	none	2	2	5	100	50	500	5000	500000	500	500	1	2	2	0	0	0
17323	3	50	50	none	2	2	5	100	50	500	5000	500000	500	500	1	2	2	0	0	0
17299	3	50	50	none	2	2	5	100	50	500	5000	500000	500	500	1	2	2	0	0	0
17183	3	50	50	none	2	2	5	100	50	500	5000	500000	500	500	1	3	4	0	0	0
17375	3	50	50	none	2	2	5	100	50	500	5000	500000	500	500	1	3	4	1	0	0
17313	3	50	50	none	2	2	5	100	50	500	5000	500000	500	500	1	2	2	0	0	0
17261	3	50	50	none	2	2	5	100	50	500	5000	500000	500	500	1	2	2	0	0	0
17202	3	50	50	none	2	2	5	100	50	500	5000	500000	500	500	1	2	2	0	0	0
17094	3	50	50	none	2	2	5	100	50	500	5000	500000	500	500	1	3	4	0	0	0
17430	3	50	50	none	2	2	5	100	50	500	5000	500000	500	500	1	2	2	0	0	0
16845	3	50	50	none	1	2	5	100	50	500	5000	500000	500	500	1	2	2	0	0	0
17372	3	50	50	none	2	2	5	100	50	500	5000	500000	500	500	1	3	3	0	0	0
17064	3	50	50	none	2	2	5	100	50	500	5000	500000	500	500	1	2	2	0	0	0
17245	3	50	50	none	2	2	5	100	50	500	5000	500000	500	500	1	2	2	0	1	1
17225	3	50	50	none	2	2	5	100	50	500	5000	500000	500	500	1	2	2	0	0	0
17399	3	50	50	none	2	2	5	100	50	500	5000	500000	500	500	1	2	2	0	0	0
17356	3	50	50	none	2	2	5	100	50	500	5000	500000	500	500	1	2	2	0	0	0
17082	3	50	50	none	2	2	5	100	50	500	5000	500000	500	500	1	2	2	0	0	0
16687	3	50	50	none	1	2	5	100	50	500	5000	500000	500	500	1	2	2	0	0	0
17257	3	50	50	none	2	2	5	100	50	500	5000	500000	500	500	1	2	2	0	0	0
17610	3	50	50	none	2	2	5	100	50	500	5000	500000	500	500	1	3	3	0	0	0
16035	3	50	50	none	1	2	5	100	50	500	5000	500000	500	500	1	2	2	0	0	0
17355	3	50	50	none	2	2	5	100	50	500	5000	500000	500	500	1	2	2	0	0	0
17497	3	50	50	none	2	2	5	100	50	500	5000	500000	500	500	1	2	2	0	0	0
17609	3	50	50	none	2	2	5	100	50	500	5000	500000	500	500	1	2	2	0	0	0
17698	3	50	50	none	2	2	5	100	50	500	5000	500000	500	500	1	2	2	0	0	0
17627	3	50	50	none	2	2	5	100	50	500	5000	500000	500	500	1	2	2	0	0	0
17889	3	50	50	none	2	2	5	100	50	500	5000	500000	500	500	1	2	2	0	0	0
17719	3	50	50	none	2	2	5	100	50	500	5000	500000	500	500	1	3	4	0	0	0
17704	3	50	50	none	2	2	5	100	50	500	5000	500000	500	500	1	2	2	0	0	0
17076	3	50	50	none	2	2	5	100	50	500	5000	500000	500	500	1	2	2	0	0	0
17453	3	50	50	none	2	2	5	100	50	500	5000	500000	500	500	1	2	2	0	0	0
17758	3	50	50	none	2	2	5	100	50	500	5000	500000	500	500	1	2	2	0	0	0
17793	3	50	50	none	2	2	5	100	50	500	5000	500000	500	500	1	2	2	0	0	0
17442	3	50	50	none	2	2	5	100	50	500	5000	500000	500	500	1	2	2	0	0	0
17563	3	50	50	none	2	2	5	100	50	500	5000	500000	500	500	1	3	4	0	0	0
17123	3	50	50	none	2	2	5	100	50	500	5000	500000	500	500	1	2	2	0	0	0
17958	3	50	50	none	2	2	5	100	50	500	5000	500000	500	500	1	2	2	0	0	0
17913	3	50	50	none	2	2	5	100	50	500	5000	500000	500	500	1	2	2	0	0	0
17708	3	50	50	none	2	2	5	100	50	500	5000	500000	500	500	1	2	2	0	0	0
17911	3	50	50	none	2	2	5	100	50	500	5000	500000	500	500	1	2	2	0	0	0
17670	3	50	50	none	2	2	5	100	50	500	5000	500000	500	500	1	2	2	0	0	0
17877	3	50	50	none	2	2	5	100	50	500	5000	500000	500	500	1	3	3	0	0	0
18033	3	50	50	none	3	2	5	100	50	500	5000	500000	500	500	1	2	2	0	0	0
17897	3	50	50	none	2	2	5	100	50	500	5000	500000	500	500	1	3	4	0	0	0
17959	3	50	50	none	2	2	5	100	50	500	5000	500000	500	500	1	2	2	0	0	0
17927	3	50	50	none	2	2	5	100	50	500	5000	500000	500	500	1	2	2	0	0	0
17891	3	50	50	none	2	2	5	100	50	500	5000	500000	500	500	1	3	4	0	0	0
17970	3	50	50	none	2	2	5	100	50	500	5000	500000	500	500	1	2	2	0	0	0
16863	3	50	50	none	1	2	5	100	50	500	5000	500000	500	500	1	2	2	0	0	0
17953	3	50	50	none	2	2	5	100	50	500	5000	500000	500	500	1	3	5	0	0	0
17791	3	50	50	none	2	2	5	100	50	500	5000	500000	500	500	1	3	6	0	0	0
18037	3	50	50	none	3	2	5	100	50	500	5000	500000	500	500	1	2	2	0	0	0
17887	3	50	50	none	2	2	5	100	50	500	5000	500000	500	500	1	3	5	0	0	0
18035	3	50	50	none	3	2	5	100	50	500	5000	500000	500	500	1	3	3	0	0	0
18062	3	50	50	none	3	2	5	100	50	500	5000	500000	500	500	1	2	2	0	0	0
18050	3	50	50	none	3	2	5	100	50	500	5000	500000	500	500	1	2	2	0	0	0
18066	3	50	50	none	3	2	5	100	50	500	5000	500000	500	500	1	2	2	0	0	0
18009	3	50	50	none	3	2	5	100	50	500	5000	500000	500	500	1	3	4	0	0	0
17855	3	50	50	none	2	2	5	100	50	500	5000	500000	500	500	1	2	2	0	0	0
18293	3	50	50	none	3	2	5	100	50	500	5000	500000	500	500	1	2	2	0	0	0
18039	3	50	50	none	3	2	5	100	50	500	5000	500000	500	500	1	3	3	0	0	0
17622	3	50	50	none	2	2	5	100	50	500	5000	500000	500	500	1	2	2	0	0	0
18016	3	50	50	none	3	2	5	100	50	500	5000	500000	500	500	1	2	2	0	0	0
17033	3	50	50	none	2	2	5	100	50	500	5000	500000	500	500	1	2	2	0	0	0
17915	3	50	50	none	2	2	5	100	50	500	5000	500000	500	500	1	3	3	0	0	0
18107	3	50	50	none	3	2	5	100	50	500	5000	500000	500	500	1	2	2	0	0	0
18015	3	50	50	none	3	2	5	100	50	500	5000	500000	500	500	1	2	2	0	0	0
18087	3	50	50	none	3	2	5	100	50	500	5000	500000	500	500	1	2	2	0	0	0
17957	3	50	50	none	2	2	5	100	50	500	5000	500000	500	500	1	2	2	0	0	0
18053	3	50	50	none	3	2	5	100	50	500	5000	500000	500	500	1	2	2	0	0	0
17930	3	50	50	none	2	2	5	100	50	500	5000	500000	500	500	1	2	2	0	0	0
17272	3	50	50	none	2	2	5	100	50	500	5000	500000	500	500	1	2	2	0	0	0
17522	3	50	50	none	2	2	5	100	50	500	5000	500000	500	500	1	2	2	0	0	0
17871	3	50	50	none	2	2	5	100	50	500	5000	500000	500	500	1	2	2	0	0	0
17935	3	50	50	none	2	2	5	100	50	500	5000	500000	500	500	1	3	4	0	0	0
18146	3	50	50	none	3	2	5	100	50	500	5000	500000	500	500	1	2	2	0	0	0
17513	3	50	50	none	2	2	5	100	50	500	5000	500000	500	500	1	2	2	0	0	0
17988	3	50	50	none	2	2	5	100	50	500	5000	500000	500	500	1	2	2	0	0	0
18237	3	50	50	none	3	2	5	100	50	500	5000	500000	500	500	1	2	2	0	0	0
17648	3	50	50	none	2	2	5	100	50	500	5000	500000	500	500	1	2	2	0	0	0
18129	3	50	50	none	3	2	5	100	50	500	5000	500000	500	500	1	3	3	0	0	0
18260	3	50	50	none	3	2	5	100	50	500	5000	500000	500	500	1	2	2	0	0	0
17584	3	50	50	none	2	2	5	100	50	500	5000	500000	500	500	1	2	2	0	0	0
18268	3	50	50	none	3	2	5	100	50	500	5000	500000	500	500	1	2	2	0	0	0
18271	3	50	50	none	3	2	5	100	50	500	5000	500000	500	500	1	2	2	0	0	0
18286	3	50	50	none	3	2	5	100	50	500	5000	500000	500	500	1	3	4	0	0	0
17994	3	50	50	none	2	2	5	100	50	500	5000	500000	500	500	1	2	2	0	0	0
18116	3	50	50	none	3	2	5	100	50	500	5000	500000	500	500	1	2	2	0	0	0
18304	3	50	50	none	3	2	5	100	50	500	5000	500000	500	500	1	2	2	0	0	0
18290	3	50	50	none	3	2	5	100	50	500	5000	500000	500	500	1	2	2	0	0	0
18372	3	50	50	none	3	2	5	100	50	500	5000	500000	500	500	1	3	4	0	0	0
18403	3	50	50	none	3	2	5	100	50	500	5000	500000	500	500	1	3	4	0	0	0
18360	3	50	50	none	3	2	5	100	50	500	5000	500000	500	500	1	2	2	0	0	0
18327	3	50	50	none	3	2	5	100	50	500	5000	500000	500	500	1	2	2	0	0	0
18254	3	50	50	none	3	2	5	100	50	500	5000	500000	500	500	1	2	2	0	0	0
18308	3	50	50	none	3	2	5	100	50	500	5000	500000	500	500	1	2	2	0	0	0
18217	3	50	50	none	3	2	5	100	50	500	5000	500000	500	500	1	2	2	0	0	0
18229	3	50	50	none	3	2	5	100	50	500	5000	500000	500	500	1	2	2	0	0	0
18148	3	50	50	none	3	2	5	100	50	500	5000	500000	500	500	1	3	4	0	0	0
17693	3	50	50	none	2	2	5	100	50	500	5000	500000	500	500	1	3	4	0	0	0
18319	3	50	50	none	3	2	5	100	50	500	5000	500000	500	500	1	2	2	0	0	0
18405	3	50	50	none	3	2	5	100	50	500	5000	500000	500	500	1	2	2	0	0	0
18288	3	50	50	none	3	2	5	100	50	500	5000	500000	500	500	1	2	2	0	0	0
18101	3	50	50	none	3	2	5	100	50	500	5000	500000	500	500	1	2	2	0	0	0
18428	3	50	50	none	3	2	5	100	50	500	5000	500000	500	500	1	2	2	0	0	0
18461	3	50	50	none	3	2	5	100	50	500	5000	500000	500	500	1	2	2	0	0	0
18462	3	50	50	none	3	2	5	100	50	500	5000	500000	500	500	1	2	2	0	0	0
18424	3	50	50	none	3	2	5	100	50	500	5000	500000	500	500	1	2	2	0	0	0
18392	3	50	50	none	3	2	5	100	50	500	5000	500000	500	500	1	3	4	0	0	0
18324	3	50	50	none	3	2	5	100	50	500	5000	500000	500	500	1	2	2	0	0	0
18325	3	50	50	none	3	2	5	100	50	500	5000	500000	500	500	1	3	3	0	0	0
18380	3	50	50	none	3	2	5	100	50	500	5000	500000	500	500	1	2	2	0	1	1
18465	3	50	50	none	3	2	5	100	50	500	5000	500000	500	500	1	2	2	0	0	0
18454	3	50	50	none	3	2	5	100	50	500	5000	500000	500	500	1	2	2	0	0	0
18470	3	50	50	none	3	2	5	100	50	500	5000	500000	500	500	1	2	2	0	0	0
18464	3	50	50	none	3	2	5	100	50	500	5000	500000	500	500	1	2	2	0	0	0
18471	3	50	50	none	3	2	5	100	50	500	5000	500000	500	500	1	2	2	0	0	0
17259	3	50	50	none	2	2	5	100	50	500	5000	500000	500	500	1	2	2	0	0	0
18563	3	50	50	none	3	2	5	100	50	500	5000	500000	500	500	1	2	2	0	0	0
18592	3	50	50	none	3	2	5	100	50	500	5000	500000	500	500	1	3	3	1	0	0
18517	3	50	50	none	3	2	5	100	50	500	5000	500000	500	500	1	2	2	0	0	0
18498	3	50	50	none	3	2	5	100	50	500	5000	500000	500	500	1	2	2	0	0	0
18533	3	50	50	none	3	2	5	100	50	500	5000	500000	500	500	1	2	2	0	0	0
18588	3	50	50	none	3	2	5	100	50	500	5000	500000	500	500	1	2	2	0	0	0
18128	3	50	50	none	3	2	5	100	50	500	5000	500000	500	500	1	2	2	0	0	0
18529	3	50	50	none	3	2	5	100	50	500	5000	500000	500	500	1	3	3	0	0	0
18611	3	50	50	none	3	2	5	100	50	500	5000	500000	500	500	1	2	2	0	0	0
18534	3	50	50	none	3	2	5	100	50	500	5000	500000	500	500	1	2	2	0	0	0
18497	3	50	50	none	3	2	5	100	50	500	5000	500000	500	500	1	2	2	0	0	0
18568	3	50	50	none	3	2	5	100	50	500	5000	500000	500	500	1	3	4	0	0	0
18676	3	50	50	none	3	2	5	100	50	500	5000	500000	500	500	1	3	4	0	0	0
18353	3	50	50	none	3	2	5	100	50	500	5000	500000	500	500	1	2	2	0	0	0
18466	3	50	50	none	3	2	5	100	50	500	5000	500000	500	500	1	2	2	0	0	0
18487	3	50	50	none	3	2	5	100	50	500	5000	500000	500	500	1	3	3	0	0	0
18622	3	50	50	none	3	2	5	100	50	500	5000	500000	500	500	1	2	2	0	0	0
18303	3	50	50	none	3	2	5	100	50	500	5000	500000	500	500	1	2	2	0	0	0
18659	3	50	50	none	3	2	5	100	50	500	5000	500000	500	500	1	2	2	0	0	0
18367	3	50	50	none	3	2	5	100	50	500	5000	500000	500	500	1	2	2	0	0	0
17912	3	50	50	none	2	2	5	100	50	500	5000	500000	500	500	1	2	2	0	0	0
18721	3	50	50	none	3	2	5	100	50	500	5000	500000	500	500	1	2	2	0	0	0
18634	3	50	50	none	3	2	5	100	50	500	5000	500000	500	500	1	3	4	1	0	0
18358	3	50	50	none	3	2	5	100	50	500	5000	500000	500	500	1	2	2	0	0	0
18674	3	50	50	none	3	2	5	100	50	500	5000	500000	500	500	1	2	2	0	0	0
18722	3	50	50	none	3	2	5	100	50	500	5000	500000	500	500	1	3	3	0	0	0
18572	3	50	50	none	3	2	5	100	50	500	5000	500000	500	500	1	2	2	0	0	0
18708	3	50	50	none	3	2	5	100	50	500	5000	500000	500	500	1	2	2	0	0	0
18632	3	50	50	none	3	2	5	100	50	500	5000	500000	500	500	1	3	3	0	0	0
18828	3	50	50	none	3	2	5	100	50	500	5000	500000	500	500	1	2	2	0	0	0
18806	3	50	50	none	3	2	5	100	50	500	5000	500000	500	500	1	2	2	0	0	0
18791	3	50	50	none	3	2	5	100	50	500	5000	500000	500	500	1	3	3	2	0	0
18735	3	50	50	none	3	2	5	100	50	500	5000	500000	500	500	1	2	2	0	0	0
18645	3	50	50	none	3	2	5	100	50	500	5000	500000	500	500	1	2	2	0	0	0
18775	3	50	50	none	3	2	5	100	50	500	5000	500000	500	500	1	2	2	0	0	0
18958	3	50	50	none	3	2	5	100	50	500	5000	500000	500	500	1	3	4	0	0	0
18801	3	50	50	none	3	2	5	100	50	500	5000	500000	500	500	1	2	2	0	0	0
18840	3	50	50	none	3	2	5	100	50	500	5000	500000	500	500	1	2	2	0	0	0
18867	3	50	50	none	3	2	5	100	50	500	5000	500000	500	500	1	2	2	0	0	0
18594	3	50	50	none	3	2	5	100	50	500	5000	500000	500	500	1	2	2	0	0	0
18215	3	50	50	none	3	2	5	100	50	500	5000	500000	500	500	1	2	2	0	0	0
18807	3	50	50	none	3	2	5	100	50	500	5000	500000	500	500	1	2	2	0	0	0
18675	3	50	50	none	3	2	5	100	50	500	5000	500000	500	500	1	3	3	0	0	0
18811	3	50	50	none	3	2	5	100	50	500	5000	500000	500	500	1	2	2	0	0	0
18836	3	50	50	none	3	2	5	100	50	500	5000	500000	500	500	1	3	3	0	0	0
18809	3	50	50	none	3	2	5	100	50	500	5000	500000	500	500	1	2	2	0	0	0
18855	3	50	50	none	3	2	5	100	50	500	5000	500000	500	500	1	2	2	0	0	0
18875	3	50	50	none	3	2	5	100	50	500	5000	500000	500	500	1	2	2	0	0	0
18528	3	50	50	none	3	2	5	100	50	500	5000	500000	500	500	1	3	4	0	0	0
18668	3	50	50	none	3	2	5	100	50	500	5000	500000	500	500	1	2	2	0	0	0
18854	3	50	50	none	3	2	5	100	50	500	5000	500000	500	500	1	3	4	0	0	0
18853	3	50	50	none	3	2	5	100	50	500	5000	500000	500	500	1	2	2	0	0	0
18857	3	50	50	none	3	2	5	100	50	500	5000	500000	500	500	1	2	2	0	0	0
18891	3	50	50	none	3	2	5	100	50	500	5000	500000	500	500	1	2	2	0	0	0
18976	3	50	50	none	3	2	5	100	50	500	5000	500000	500	500	1	2	2	0	0	0
18960	3	50	50	none	3	2	5	100	50	500	5000	500000	500	500	1	2	2	0	0	0
18881	3	50	50	none	3	2	5	100	50	500	5000	500000	500	500	1	2	2	0	0	0
19267	3	50	50	none	4	2	5	100	50	500	5000	500000	500	500	1	3	3	1	0	0
18879	3	50	50	none	3	2	5	100	50	500	5000	500000	500	500	1	2	2	0	0	0
19063	3	50	50	none	4	2	5	100	50	500	5000	500000	500	500	1	2	2	0	0	0
19078	3	50	50	none	4	2	5	100	50	500	5000	500000	500	500	1	2	2	0	1	1
18974	3	50	50	none	3	2	5	100	50	500	5000	500000	500	500	1	3	3	0	0	0
19080	3	50	50	none	4	2	5	100	50	500	5000	500000	500	500	1	2	2	0	0	0
19182	3	50	50	none	4	2	5	100	50	500	5000	500000	500	500	1	2	2	0	0	0
19213	3	50	50	none	4	2	5	100	50	500	5000	500000	500	500	1	2	2	0	0	0
18780	3	50	50	none	3	2	5	100	50	500	5000	500000	500	500	1	3	3	1	0	0
18882	3	50	50	none	3	2	5	100	50	500	5000	500000	500	500	1	2	2	0	0	0
19273	3	50	50	none	4	2	5	100	50	500	5000	500000	500	500	1	3	3	0	0	0
18924	3	50	50	none	3	2	5	100	50	500	5000	500000	500	500	1	2	2	0	0	0
19040	3	50	50	none	4	2	5	100	50	500	5000	500000	500	500	1	2	2	0	0	0
19135	3	50	50	none	4	2	5	100	50	500	5000	500000	500	500	1	3	3	0	0	0
18893	3	50	50	none	3	2	5	100	50	500	5000	500000	500	500	1	2	2	0	0	0
19098	3	50	50	none	4	2	5	100	50	500	5000	500000	500	500	1	2	2	0	0	0
19126	3	50	50	none	4	2	5	100	50	500	5000	500000	500	500	1	2	2	0	0	0
18446	3	50	50	none	3	2	5	100	50	500	5000	500000	500	500	1	2	2	0	1	1
18868	3	50	50	none	3	2	5	100	50	500	5000	500000	500	500	1	2	2	0	0	0
19131	3	50	50	none	4	2	5	100	50	500	5000	500000	500	500	1	2	2	0	0	0
19303	3	50	50	none	4	2	5	100	50	500	5000	500000	500	500	1	2	2	0	0	0
19172	3	50	50	none	4	2	5	100	50	500	5000	500000	500	500	1	3	3	0	0	0
19020	3	50	50	none	4	2	5	100	50	500	5000	500000	500	500	1	2	2	0	0	0
19333	3	50	50	none	4	2	5	100	50	500	5000	500000	500	500	1	2	2	0	0	0
19266	3	50	50	none	4	2	5	100	50	500	5000	500000	500	500	1	3	4	1	0	0
19252	3	50	50	none	4	2	5	100	50	500	5000	500000	500	500	1	2	2	0	0	0
19319	3	50	50	none	4	2	5	100	50	500	5000	500000	500	500	1	2	2	0	0	0
19331	3	50	50	none	4	2	5	100	50	500	5000	500000	500	500	1	2	2	0	0	0
19335	3	50	50	none	4	2	5	100	50	500	5000	500000	500	500	1	2	2	0	0	0
19288	3	50	50	none	4	2	5	100	50	500	5000	500000	500	500	1	2	2	0	0	0
19324	3	50	50	none	4	2	5	100	50	500	5000	500000	500	500	1	2	2	0	0	0
19163	3	50	50	none	4	2	5	100	50	500	5000	500000	500	500	1	3	3	0	0	0
18596	3	50	50	none	3	2	5	100	50	500	5000	500000	500	500	1	2	2	0	0	0
19343	3	50	50	none	4	2	5	100	50	500	5000	500000	500	500	1	2	2	0	0	0
19261	3	50	50	none	4	2	5	100	50	500	5000	500000	500	500	1	3	4	0	0	0
18204	3	50	50	none	3	2	5	100	50	500	5000	500000	500	500	1	2	2	0	0	0
18933	3	50	50	none	3	2	5	100	50	500	5000	500000	500	500	1	2	2	0	0	0
19365	3	50	50	none	4	2	5	100	50	500	5000	500000	500	500	1	2	2	0	0	0
19522	3	50	50	none	4	2	5	100	50	500	5000	500000	500	500	1	2	2	0	0	0
19594	3	50	50	none	4	2	5	100	50	500	5000	500000	500	500	1	3	3	0	0	0
19421	3	50	50	none	4	2	5	100	50	500	5000	500000	500	500	1	3	4	0	0	0
19439	3	50	50	none	4	2	5	100	50	500	5000	500000	500	500	1	3	4	0	0	0
19588	3	50	50	none	4	2	5	100	50	500	5000	500000	500	500	1	3	4	0	0	0
19449	3	50	50	none	4	2	5	100	50	500	5000	500000	500	500	1	2	2	0	0	0
19557	3	50	50	none	4	2	5	100	50	500	5000	500000	500	500	1	3	3	1	0	0
19151	3	50	50	none	4	2	5	100	50	500	5000	500000	500	500	1	3	4	0	0	0
19631	3	50	50	none	4	2	5	100	50	500	5000	500000	500	500	1	2	2	0	0	0
19499	3	50	50	none	4	2	5	100	50	500	5000	500000	500	500	1	3	4	0	0	0
19585	3	50	50	none	4	2	5	100	50	500	5000	500000	500	500	1	2	2	0	0	0
19046	3	50	50	none	4	2	5	100	50	500	5000	500000	500	500	1	2	2	0	0	0
19395	3	50	50	none	4	2	5	100	50	500	5000	500000	500	500	1	2	2	0	0	0
19630	3	50	50	none	4	2	5	100	50	500	5000	500000	500	500	1	2	2	0	0	0
19526	3	50	50	none	4	2	5	100	50	500	5000	500000	500	500	1	2	2	0	0	0
18774	3	50	50	none	3	2	5	100	50	500	5000	500000	500	500	1	2	2	0	0	0
19564	3	50	50	none	4	2	5	100	50	500	5000	500000	500	500	1	3	3	0	0	0
19587	3	50	50	none	4	2	5	100	50	500	5000	500000	500	500	1	2	2	0	0	0
19569	3	50	50	none	4	2	5	100	50	500	5000	500000	500	500	1	2	2	0	0	0
19473	3	50	50	none	4	2	5	100	50	500	5000	500000	500	500	1	2	2	0	0	0
19560	3	50	50	none	4	2	5	100	50	500	5000	500000	500	500	1	2	2	0	0	0
18896	3	50	50	none	3	2	5	100	50	500	5000	500000	500	500	1	2	2	0	0	0
19671	3	50	50	none	4	2	5	100	50	500	5000	500000	500	500	1	2	2	0	0	0
19793	3	50	50	none	4	2	5	100	50	500	5000	500000	500	500	1	3	3	0	0	0
18434	3	50	50	none	3	2	5	100	50	500	5000	500000	500	500	1	2	2	0	0	0
19702	3	50	50	none	4	2	5	100	50	500	5000	500000	500	500	1	2	2	0	0	0
19031	3	50	50	none	4	2	5	100	50	500	5000	500000	500	500	1	2	2	0	0	0
19635	3	50	50	none	4	2	5	100	50	500	5000	500000	500	500	1	2	2	0	0	0
19336	3	50	50	none	4	2	5	100	50	500	5000	500000	500	500	1	2	2	0	0	0
18808	3	50	50	none	3	2	5	100	50	500	5000	500000	500	500	1	2	2	0	0	0
18707	3	50	50	none	3	2	5	100	50	500	5000	500000	500	500	1	3	3	0	0	0
19662	3	50	50	none	4	2	5	100	50	500	5000	500000	500	500	1	2	2	0	0	0
19665	3	50	50	none	4	2	5	100	50	500	5000	500000	500	500	1	2	2	0	0	0
19970	3	50	50	none	4	2	5	100	50	500	5000	500000	500	500	1	2	2	0	0	0
19670	3	50	50	none	4	2	5	100	50	500	5000	500000	500	500	1	2	2	0	0	0
19440	3	50	50	none	4	2	5	100	50	500	5000	500000	500	500	1	2	2	0	0	0
19681	3	50	50	none	4	2	5	100	50	500	5000	500000	500	500	1	2	2	0	0	0
19810	3	50	50	none	4	2	5	100	50	500	5000	500000	500	500	1	3	3	0	0	0
19753	3	50	50	none	4	2	5	100	50	500	5000	500000	500	500	1	2	2	0	0	0
19821	3	50	50	none	4	2	5	100	50	500	5000	500000	500	500	1	2	2	0	0	0
19803	3	50	50	none	4	2	5	100	50	500	5000	500000	500	500	1	2	2	0	0	0
19616	3	50	50	none	4	2	5	100	50	500	5000	500000	500	500	1	2	2	0	0	0
19695	3	50	50	none	4	2	5	100	50	500	5000	500000	500	500	1	2	2	0	0	0
19807	3	50	50	none	4	2	5	100	50	500	5000	500000	500	500	1	2	2	0	0	0
19860	3	50	50	none	4	2	5	100	50	500	5000	500000	500	500	1	2	2	0	0	0
19458	3	50	50	none	4	2	5	100	50	500	5000	500000	500	500	1	3	4	0	0	0
20072	3	50	50	lof	0	2	5	100	50	500	5000	500000	500	500	1	2	2	0	0	0
19781	3	50	50	none	4	2	5	100	50	500	5000	500000	500	500	1	2	2	0	0	0
19739	3	50	50	none	4	2	5	100	50	500	5000	500000	500	500	1	2	2	0	0	0
19647	3	50	50	none	4	2	5	100	50	500	5000	500000	500	500	1	3	3	1	0	0
18468	3	50	50	none	3	2	5	100	50	500	5000	500000	500	500	1	2	2	0	0	0
19717	3	50	50	none	4	2	5	100	50	500	5000	500000	500	500	1	2	2	0	0	0
19856	3	50	50	none	4	2	5	100	50	500	5000	500000	500	500	1	2	2	0	0	0
19951	3	50	50	none	4	2	5	100	50	500	5000	500000	500	500	1	3	5	0	0	0
19827	3	50	50	none	4	2	5	100	50	500	5000	500000	500	500	1	2	2	0	0	0
19813	3	50	50	none	4	2	5	100	50	500	5000	500000	500	500	1	3	4	0	0	0
19798	3	50	50	none	4	2	5	100	50	500	5000	500000	500	500	1	2	2	0	0	0
19962	3	50	50	none	4	2	5	100	50	500	5000	500000	500	500	1	2	2	0	0	0
19895	3	50	50	none	4	2	5	100	50	500	5000	500000	500	500	1	2	2	0	0	0
19285	3	50	50	none	4	2	5	100	50	500	5000	500000	500	500	1	2	2	0	0	0
19673	3	50	50	none	4	2	5	100	50	500	5000	500000	500	500	1	2	2	0	0	0
19329	3	50	50	none	4	2	5	100	50	500	5000	500000	500	500	1	2	2	0	0	0
19536	3	50	50	none	4	2	5	100	50	500	5000	500000	500	500	1	2	2	0	0	0
19924	3	50	50	none	4	2	5	100	50	500	5000	500000	500	500	1	2	2	0	0	0
19842	3	50	50	none	4	2	5	100	50	500	5000	500000	500	500	1	2	2	0	0	0
19977	3	50	50	none	4	2	5	100	50	500	5000	500000	500	500	1	2	2	0	0	0
20162	3	50	50	lof	0	2	5	100	50	500	5000	500000	500	500	1	2	2	0	0	0
20096	3	50	50	lof	0	2	5	100	50	500	5000	500000	500	500	1	2	2	0	0	0
20038	3	50	50	lof	0	2	5	100	50	500	5000	500000	500	500	1	2	2	0	0	0
19676	3	50	50	none	4	2	5	100	50	500	5000	500000	500	500	1	3	4	0	0	0
20005	3	50	50	lof	0	2	5	100	50	500	5000	500000	500	500	1	2	2	0	0	0
19925	3	50	50	none	4	2	5	100	50	500	5000	500000	500	500	1	2	2	0	0	0
19874	3	50	50	none	4	2	5	100	50	500	5000	500000	500	500	1	2	2	0	0	0
20031	3	50	50	lof	0	2	5	100	50	500	5000	500000	500	500	1	2	2	0	1	1
20091	3	50	50	lof	0	2	5	100	50	500	5000	500000	500	500	1	2	2	0	0	0
20112	3	50	50	lof	0	2	5	100	50	500	5000	500000	500	500	1	2	2	0	0	0
19610	3	50	50	none	4	2	5	100	50	500	5000	500000	500	500	1	2	2	0	0	0
20122	3	50	50	lof	0	2	5	100	50	500	5000	500000	500	500	1	2	2	0	0	0
20126	3	50	50	lof	0	2	5	100	50	500	5000	500000	500	500	1	2	2	0	0	0
20082	3	50	50	lof	0	2	5	100	50	500	5000	500000	500	500	1	2	2	0	0	0
20056	3	50	50	lof	0	2	5	100	50	500	5000	500000	500	500	1	2	2	0	0	0
19922	3	50	50	none	4	2	5	100	50	500	5000	500000	500	500	1	2	2	0	0	0
20163	3	50	50	lof	0	2	5	100	50	500	5000	500000	500	500	1	2	2	0	0	0
20119	3	50	50	lof	0	2	5	100	50	500	5000	500000	500	500	1	2	2	0	0	0
19407	3	50	50	none	4	2	5	100	50	500	5000	500000	500	500	1	2	2	0	0	0
20147	3	50	50	lof	0	2	5	100	50	500	5000	500000	500	500	1	2	2	0	0	0
20198	3	50	50	lof	0	2	5	100	50	500	5000	500000	500	500	1	2	2	0	0	0
20152	3	50	50	lof	0	2	5	100	50	500	5000	500000	500	500	1	2	2	0	0	0
20215	3	50	50	lof	0	2	5	100	50	500	5000	500000	500	500	1	2	2	0	0	0
20021	3	50	50	lof	0	2	5	100	50	500	5000	500000	500	500	1	2	2	0	0	0
20192	3	50	50	lof	0	2	5	100	50	500	5000	500000	500	500	1	3	4	0	0	0
20022	3	50	50	lof	0	2	5	100	50	500	5000	500000	500	500	1	2	2	0	0	0
20102	3	50	50	lof	0	2	5	100	50	500	5000	500000	500	500	1	3	4	0	0	0
19248	3	50	50	none	4	2	5	100	50	500	5000	500000	500	500	1	2	2	0	0	0
20232	3	50	50	lof	0	2	5	100	50	500	5000	500000	500	500	1	2	2	0	0	0
20200	3	50	50	lof	0	2	5	100	50	500	5000	500000	500	500	1	2	2	0	0	0
20035	3	50	50	lof	0	2	5	100	50	500	5000	500000	500	500	1	2	2	0	0	0
20256	3	50	50	lof	0	2	5	100	50	500	5000	500000	500	500	1	2	2	0	0	0
20305	3	50	50	lof	0	2	5	100	50	500	5000	500000	500	500	1	2	2	0	0	0
20289	3	50	50	lof	0	2	5	100	50	500	5000	500000	500	500	1	2	2	0	0	0
20510	3	50	50	lof	0	2	5	100	50	500	5000	500000	500	500	1	2	2	0	0	0
20134	3	50	50	lof	0	2	5	100	50	500	5000	500000	500	500	1	3	3	0	0	0
20044	3	50	50	lof	0	2	5	100	50	500	5000	500000	500	500	1	2	2	0	0	0
20433	3	50	50	lof	0	2	5	100	50	500	5000	500000	500	500	1	2	2	0	0	0
19868	3	50	50	none	4	2	5	100	50	500	5000	500000	500	500	1	2	2	0	0	0
20457	3	50	50	lof	0	2	5	100	50	500	5000	500000	500	500	1	3	3	0	0	0
19811	3	50	50	none	4	2	5	100	50	500	5000	500000	500	500	1	2	2	0	0	0
19967	3	50	50	none	4	2	5	100	50	500	5000	500000	500	500	1	2	2	0	0	0
20448	3	50	50	lof	0	2	5	100	50	500	5000	500000	500	500	1	2	2	0	0	0
20349	3	50	50	lof	0	2	5	100	50	500	5000	500000	500	500	1	2	2	0	0	0
20344	3	50	50	lof	0	2	5	100	50	500	5000	500000	500	500	1	2	2	0	0	0
20239	3	50	50	lof	0	2	5	100	50	500	5000	500000	500	500	1	3	5	0	0	0
20404	3	50	50	lof	0	2	5	100	50	500	5000	500000	500	500	1	2	2	0	0	0
19870	3	50	50	none	4	2	5	100	50	500	5000	500000	500	500	1	2	2	0	0	0
20376	3	50	50	lof	0	2	5	100	50	500	5000	500000	500	500	1	2	2	0	0	0
20458	3	50	50	lof	0	2	5	100	50	500	5000	500000	500	500	1	2	2	0	0	0
20541	3	50	50	lof	0	2	5	100	50	500	5000	500000	500	500	1	2	2	0	0	0
20281	3	50	50	lof	0	2	5	100	50	500	5000	500000	500	500	1	2	2	0	0	0
20303	3	50	50	lof	0	2	5	100	50	500	5000	500000	500	500	1	2	2	0	0	0
20469	3	50	50	lof	0	2	5	100	50	500	5000	500000	500	500	1	2	2	0	0	0
20328	3	50	50	lof	0	2	5	100	50	500	5000	500000	500	500	1	2	2	0	0	0
20546	3	50	50	lof	0	2	5	100	50	500	5000	500000	500	500	1	3	3	1	0	0
20523	3	50	50	lof	0	2	5	100	50	500	5000	500000	500	500	1	2	2	0	0	0
20545	3	50	50	lof	0	2	5	100	50	500	5000	500000	500	500	1	2	2	0	0	0
20615	3	50	50	lof	0	2	5	100	50	500	5000	500000	500	500	1	2	2	0	0	0
20475	3	50	50	lof	0	2	5	100	50	500	5000	500000	500	500	1	2	2	0	0	0
20537	3	50	50	lof	0	2	5	100	50	500	5000	500000	500	500	1	2	2	0	0	0
20619	3	50	50	lof	0	2	5	100	50	500	5000	500000	500	500	1	2	2	0	0	0
20521	3	50	50	lof	0	2	5	100	50	500	5000	500000	500	500	1	2	2	0	0	0
20611	3	50	50	lof	0	2	5	100	50	500	5000	500000	500	500	1	3	3	0	0	0
20563	3	50	50	lof	0	2	5	100	50	500	5000	500000	500	500	1	2	2	0	0	0
20534	3	50	50	lof	0	2	5	100	50	500	5000	500000	500	500	1	3	4	0	0	0
20525	3	50	50	lof	0	2	5	100	50	500	5000	500000	500	500	1	2	2	0	0	0
20308	3	50	50	lof	0	2	5	100	50	500	5000	500000	500	500	1	2	2	0	0	0
20577	3	50	50	lof	0	2	5	100	50	500	5000	500000	500	500	1	2	2	0	0	0
20605	3	50	50	lof	0	2	5	100	50	500	5000	500000	500	500	1	2	2	0	0	0
20387	3	50	50	lof	0	2	5	100	50	500	5000	500000	500	500	1	2	2	0	0	0
20580	3	50	50	lof	0	2	5	100	50	500	5000	500000	500	500	1	3	3	0	0	0
20193	3	50	50	lof	0	2	5	100	50	500	5000	500000	500	500	1	3	3	0	0	0
20347	3	50	50	lof	0	2	5	100	50	500	5000	500000	500	500	1	2	2	0	0	0
20602	3	50	50	lof	0	2	5	100	50	500	5000	500000	500	500	1	2	2	0	0	0
20263	3	50	50	lof	0	2	5	100	50	500	5000	500000	500	500	1	2	2	0	0	0
20566	3	50	50	lof	0	2	5	100	50	500	5000	500000	500	500	1	2	2	0	0	0
20509	3	50	50	lof	0	2	5	100	50	500	5000	500000	500	500	1	2	2	0	0	0
20593	3	50	50	lof	0	2	5	100	50	500	5000	500000	500	500	1	3	3	1	0	0
20870	3	50	50	lof	0	2	5	100	50	500	5000	500000	500	500	1	3	3	0	0	0
20707	3	50	50	lof	0	2	5	100	50	500	5000	500000	500	500	1	2	2	0	0	0
20701	3	50	50	lof	0	2	5	100	50	500	5000	500000	500	500	1	2	2	0	0	0
20199	3	50	50	lof	0	2	5	100	50	500	5000	500000	500	500	1	3	3	0	0	0
20915	3	50	50	lof	0	2	5	100	50	500	5000	500000	500	500	1	2	2	0	0	0
20657	3	50	50	lof	0	2	5	100	50	500	5000	500000	500	500	1	3	5	0	0	0
20916	3	50	50	lof	0	2	5	100	50	500	5000	500000	500	500	1	2	2	0	0	0
20754	3	50	50	lof	0	2	5	100	50	500	5000	500000	500	500	1	2	2	0	0	0
20695	3	50	50	lof	0	2	5	100	50	500	5000	500000	500	500	1	2	2	0	0	0
20923	3	50	50	lof	0	2	5	100	50	500	5000	500000	500	500	1	2	2	0	0	0
20789	3	50	50	lof	0	2	5	100	50	500	5000	500000	500	500	1	2	2	0	0	0
20716	3	50	50	lof	0	2	5	100	50	500	5000	500000	500	500	1	2	2	0	0	0
20653	3	50	50	lof	0	2	5	100	50	500	5000	500000	500	500	1	2	2	0	0	0
20929	3	50	50	lof	0	2	5	100	50	500	5000	500000	500	500	1	2	2	0	0	0
20944	3	50	50	lof	0	2	5	100	50	500	5000	500000	500	500	1	2	2	0	0	0
20780	3	50	50	lof	0	2	5	100	50	500	5000	500000	500	500	1	2	2	0	0	0
21026	3	50	50	lof	1	2	5	100	50	500	5000	500000	500	500	1	2	2	0	0	0
20878	3	50	50	lof	0	2	5	100	50	500	5000	500000	500	500	1	2	2	0	0	0
21006	3	50	50	lof	1	2	5	100	50	500	5000	500000	500	500	1	2	2	0	0	0
20987	3	50	50	lof	0	2	5	100	50	500	5000	500000	500	500	1	2	2	0	0	0
21041	3	50	50	lof	1	2	5	100	50	500	5000	500000	500	500	1	2	2	0	0	0
21125	3	50	50	lof	1	2	5	100	50	500	5000	500000	500	500	1	3	3	0	0	0
21076	3	50	50	lof	1	2	5	100	50	500	5000	500000	500	500	1	3	3	0	0	0
20666	3	50	50	lof	0	2	5	100	50	500	5000	500000	500	500	1	3	5	0	0	0
20931	3	50	50	lof	0	2	5	100	50	500	5000	500000	500	500	1	2	2	0	0	0
20159	3	50	50	lof	0	2	5	100	50	500	5000	500000	500	500	1	2	2	0	0	0
21020	3	50	50	lof	1	2	5	100	50	500	5000	500000	500	500	1	2	2	0	0	0
20874	3	50	50	lof	0	2	5	100	50	500	5000	500000	500	500	1	2	2	0	0	0
20871	3	50	50	lof	0	2	5	100	50	500	5000	500000	500	500	1	2	2	0	0	0
21054	3	50	50	lof	1	2	5	100	50	500	5000	500000	500	500	1	3	4	0	0	0
20819	3	50	50	lof	0	2	5	100	50	500	5000	500000	500	500	1	3	5	0	0	0
20952	3	50	50	lof	0	2	5	100	50	500	5000	500000	500	500	1	2	2	0	0	0
20991	3	50	50	lof	0	2	5	100	50	500	5000	500000	500	500	1	2	2	0	0	0
21161	3	50	50	lof	1	2	5	100	50	500	5000	500000	500	500	1	2	2	0	0	0
21174	3	50	50	lof	1	2	5	100	50	500	5000	500000	500	500	1	2	2	0	0	0
21077	3	50	50	lof	1	2	5	100	50	500	5000	500000	500	500	1	3	4	0	0	0
21024	3	50	50	lof	1	2	5	100	50	500	5000	500000	500	500	1	2	2	0	0	0
21110	3	50	50	lof	1	2	5	100	50	500	5000	500000	500	500	1	2	2	0	0	0
20903	3	50	50	lof	0	2	5	100	50	500	5000	500000	500	500	1	2	2	0	0	0
21290	3	50	50	lof	1	2	5	100	50	500	5000	500000	500	500	1	2	2	0	0	0
21244	3	50	50	lof	1	2	5	100	50	500	5000	500000	500	500	1	2	2	0	0	0
20995	3	50	50	lof	0	2	5	100	50	500	5000	500000	500	500	1	2	2	0	0	0
20883	3	50	50	lof	0	2	5	100	50	500	5000	500000	500	500	1	3	4	0	0	0
21092	3	50	50	lof	1	2	5	100	50	500	5000	500000	500	500	1	2	2	0	0	0
21694	3	50	50	lof	1	2	5	100	50	500	5000	500000	500	500	1	2	2	0	0	0
20731	3	50	50	lof	0	2	5	100	50	500	5000	500000	500	500	1	2	2	0	0	0
21239	3	50	50	lof	1	2	5	100	50	500	5000	500000	500	500	1	3	5	0	0	0
21354	3	50	50	lof	1	2	5	100	50	500	5000	500000	500	500	1	2	2	0	0	0
21261	3	50	50	lof	1	2	5	100	50	500	5000	500000	500	500	1	2	2	0	0	0
21236	3	50	50	lof	1	2	5	100	50	500	5000	500000	500	500	1	3	5	0	0	0
21096	3	50	50	lof	1	2	5	100	50	500	5000	500000	500	500	1	2	2	0	0	0
21251	3	50	50	lof	1	2	5	100	50	500	5000	500000	500	500	1	2	2	0	0	0
21243	3	50	50	lof	1	2	5	100	50	500	5000	500000	500	500	1	2	2	0	0	0
21159	3	50	50	lof	1	2	5	100	50	500	5000	500000	500	500	1	2	2	0	0	0
21347	3	50	50	lof	1	2	5	100	50	500	5000	500000	500	500	1	2	2	0	0	0
19837	3	50	50	none	4	2	5	100	50	500	5000	500000	500	500	1	2	2	0	0	0
21133	3	50	50	lof	1	2	5	100	50	500	5000	500000	500	500	1	2	2	0	0	0
21351	3	50	50	lof	1	2	5	100	50	500	5000	500000	500	500	1	3	4	0	0	0
21366	3	50	50	lof	1	2	5	100	50	500	5000	500000	500	500	1	2	2	0	0	0
21466	3	50	50	lof	1	2	5	100	50	500	5000	500000	500	500	1	2	2	0	0	0
21153	3	50	50	lof	1	2	5	100	50	500	5000	500000	500	500	1	3	4	0	0	0
21284	3	50	50	lof	1	2	5	100	50	500	5000	500000	500	500	1	2	2	0	0	0
20616	3	50	50	lof	0	2	5	100	50	500	5000	500000	500	500	1	2	2	0	0	0
21550	3	50	50	lof	1	2	5	100	50	500	5000	500000	500	500	1	2	2	0	0	0
20698	3	50	50	lof	0	2	5	100	50	500	5000	500000	500	500	1	2	2	0	0	0
21349	3	50	50	lof	1	2	5	100	50	500	5000	500000	500	500	1	3	5	1	0	0
21309	3	50	50	lof	1	2	5	100	50	500	5000	500000	500	500	1	2	2	0	0	0
21440	3	50	50	lof	1	2	5	100	50	500	5000	500000	500	500	1	2	2	0	0	0
21515	3	50	50	lof	1	2	5	100	50	500	5000	500000	500	500	1	2	2	0	0	0
20736	3	50	50	lof	0	2	5	100	50	500	5000	500000	500	500	1	2	2	0	0	0
21913	3	50	50	lof	1	2	5	100	50	500	5000	500000	500	500	1	2	2	0	0	0
21415	3	50	50	lof	1	2	5	100	50	500	5000	500000	500	500	1	2	2	0	0	0
21645	3	50	50	lof	1	2	5	100	50	500	5000	500000	500	500	1	3	3	0	0	0
21379	3	50	50	lof	1	2	5	100	50	500	5000	500000	500	500	1	2	2	0	0	0
21644	3	50	50	lof	1	2	5	100	50	500	5000	500000	500	500	1	2	2	0	0	0
21451	3	50	50	lof	1	2	5	100	50	500	5000	500000	500	500	1	2	2	0	0	0
21539	3	50	50	lof	1	2	5	100	50	500	5000	500000	500	500	1	2	2	0	0	0
21709	3	50	50	lof	1	2	5	100	50	500	5000	500000	500	500	1	2	2	0	0	0
21546	3	50	50	lof	1	2	5	100	50	500	5000	500000	500	500	1	2	2	0	0	0
21488	3	50	50	lof	1	2	5	100	50	500	5000	500000	500	500	1	2	2	0	0	0
20837	3	50	50	lof	0	2	5	100	50	500	5000	500000	500	500	1	2	2	0	0	0
21453	3	50	50	lof	1	2	5	100	50	500	5000	500000	500	500	1	2	2	0	0	0
21592	3	50	50	lof	1	2	5	100	50	500	5000	500000	500	500	1	2	2	0	0	0
21427	3	50	50	lof	1	2	5	100	50	500	5000	500000	500	500	1	2	2	0	0	0
21643	3	50	50	lof	1	2	5	100	50	500	5000	500000	500	500	1	2	2	0	0	0
21775	3	50	50	lof	1	2	5	100	50	500	5000	500000	500	500	1	2	2	0	0	0
21707	3	50	50	lof	1	2	5	100	50	500	5000	500000	500	500	1	2	2	0	0	0
21673	3	50	50	lof	1	2	5	100	50	500	5000	500000	500	500	1	3	3	0	0	0
21888	3	50	50	lof	1	2	5	100	50	500	5000	500000	500	500	1	2	2	0	0	0
21836	3	50	50	lof	1	2	5	100	50	500	5000	500000	500	500	1	2	2	0	0	0
21872	3	50	50	lof	1	2	5	100	50	500	5000	500000	500	500	1	3	3	0	0	0
21959	3	50	50	lof	1	2	5	100	50	500	5000	500000	500	500	1	2	2	0	0	0
21965	3	50	50	lof	1	2	5	100	50	500	5000	500000	500	500	1	2	2	0	0	0
22032	3	50	50	lof	2	2	5	100	50	500	5000	500000	500	500	1	2	2	0	0	0
22005	3	50	50	lof	2	2	5	100	50	500	5000	500000	500	500	1	2	2	0	0	0
22034	3	50	50	lof	2	2	5	100	50	500	5000	500000	500	500	1	2	2	0	0	0
21880	3	50	50	lof	1	2	5	100	50	500	5000	500000	500	500	1	3	4	0	0	0
21930	3	50	50	lof	1	2	5	100	50	500	5000	500000	500	500	1	3	5	0	0	0
21761	3	50	50	lof	1	2	5	100	50	500	5000	500000	500	500	1	2	2	0	0	0
20170	3	50	50	lof	0	2	5	100	50	500	5000	500000	500	500	1	2	2	0	0	0
21568	3	50	50	lof	1	2	5	100	50	500	5000	500000	500	500	1	2	2	0	0	0
21999	3	50	50	lof	1	2	5	100	50	500	5000	500000	500	500	1	2	2	0	0	0
21941	3	50	50	lof	1	2	5	100	50	500	5000	500000	500	500	1	2	2	0	0	0
21923	3	50	50	lof	1	2	5	100	50	500	5000	500000	500	500	1	2	2	0	0	0
21773	3	50	50	lof	1	2	5	100	50	500	5000	500000	500	500	1	3	3	0	0	0
21952	3	50	50	lof	1	2	5	100	50	500	5000	500000	500	500	1	2	2	0	0	0
21983	3	50	50	lof	1	2	5	100	50	500	5000	500000	500	500	1	2	2	0	0	0
22038	3	50	50	lof	2	2	5	100	50	500	5000	500000	500	500	1	2	2	0	0	0
21766	3	50	50	lof	1	2	5	100	50	500	5000	500000	500	500	1	2	2	0	0	0
22010	3	50	50	lof	2	2	5	100	50	500	5000	500000	500	500	1	2	2	0	0	0
22129	3	50	50	lof	2	2	5	100	50	500	5000	500000	500	500	1	2	2	0	0	0
21969	3	50	50	lof	1	2	5	100	50	500	5000	500000	500	500	1	2	2	0	0	0
22107	3	50	50	lof	2	2	5	100	50	500	5000	500000	500	500	1	2	2	0	0	0
22111	3	50	50	lof	2	2	5	100	50	500	5000	500000	500	500	1	2	2	0	0	0
22045	3	50	50	lof	2	2	5	100	50	500	5000	500000	500	500	1	2	2	0	0	0
21756	3	50	50	lof	1	2	5	100	50	500	5000	500000	500	500	1	2	2	0	0	0
22169	3	50	50	lof	2	2	5	100	50	500	5000	500000	500	500	1	3	4	0	0	0
21417	3	50	50	lof	1	2	5	100	50	500	5000	500000	500	500	1	2	2	0	1	1
22255	3	50	50	lof	2	2	5	100	50	500	5000	500000	500	500	1	2	2	0	0	0
21777	3	50	50	lof	1	2	5	100	50	500	5000	500000	500	500	1	3	3	0	0	0
22073	3	50	50	lof	2	2	5	100	50	500	5000	500000	500	500	1	2	2	0	0	0
22133	3	50	50	lof	2	2	5	100	50	500	5000	500000	500	500	1	2	2	0	0	0
21917	3	50	50	lof	1	2	5	100	50	500	5000	500000	500	500	1	2	2	0	0	0
22149	3	50	50	lof	2	2	5	100	50	500	5000	500000	500	500	1	2	2	0	0	0
22076	3	50	50	lof	2	2	5	100	50	500	5000	500000	500	500	1	3	4	0	0	0
21601	3	50	50	lof	1	2	5	100	50	500	5000	500000	500	500	1	2	2	0	0	0
21762	3	50	50	lof	1	2	5	100	50	500	5000	500000	500	500	1	2	2	0	1	1
21921	3	50	50	lof	1	2	5	100	50	500	5000	500000	500	500	1	2	2	0	0	0
22199	3	50	50	lof	2	2	5	100	50	500	5000	500000	500	500	1	2	2	0	0	0
22337	3	50	50	lof	2	2	5	100	50	500	5000	500000	500	500	1	2	2	0	0	0
21996	3	50	50	lof	1	2	5	100	50	500	5000	500000	500	500	1	2	2	0	0	0
22258	3	50	50	lof	2	2	5	100	50	500	5000	500000	500	500	1	2	2	0	0	0
22226	3	50	50	lof	2	2	5	100	50	500	5000	500000	500	500	1	2	2	0	0	0
21706	3	50	50	lof	1	2	5	100	50	500	5000	500000	500	500	1	2	2	0	0	0
22124	3	50	50	lof	2	2	5	100	50	500	5000	500000	500	500	1	2	2	0	0	0
22211	3	50	50	lof	2	2	5	100	50	500	5000	500000	500	500	1	2	2	0	0	0
21994	3	50	50	lof	1	2	5	100	50	500	5000	500000	500	500	1	2	2	0	0	0
22138	3	50	50	lof	2	2	5	100	50	500	5000	500000	500	500	1	2	2	0	0	0
22449	3	50	50	lof	2	2	5	100	50	500	5000	500000	500	500	1	2	2	0	0	0
22389	3	50	50	lof	2	2	5	100	50	500	5000	500000	500	500	1	2	2	0	0	0
22379	3	50	50	lof	2	2	5	100	50	500	5000	500000	500	500	1	2	2	0	0	0
22368	3	50	50	lof	2	2	5	100	50	500	5000	500000	500	500	1	2	2	0	0	0
22206	3	50	50	lof	2	2	5	100	50	500	5000	500000	500	500	1	3	3	0	0	0
22168	3	50	50	lof	2	2	5	100	50	500	5000	500000	500	500	1	2	2	0	0	0
22333	3	50	50	lof	2	2	5	100	50	500	5000	500000	500	500	1	2	2	0	0	0
22302	3	50	50	lof	2	2	5	100	50	500	5000	500000	500	500	1	2	2	0	0	0
22612	3	50	50	lof	2	2	5	100	50	500	5000	500000	500	500	1	3	4	0	0	0
22298	3	50	50	lof	2	2	5	100	50	500	5000	500000	500	500	1	2	2	0	0	0
22463	3	50	50	lof	2	2	5	100	50	500	5000	500000	500	500	1	2	2	0	0	0
22242	3	50	50	lof	2	2	5	100	50	500	5000	500000	500	500	1	2	2	0	0	0
22268	3	50	50	lof	2	2	5	100	50	500	5000	500000	500	500	1	2	2	0	0	0
22556	3	50	50	lof	2	2	5	100	50	500	5000	500000	500	500	1	2	2	0	0	0
22613	3	50	50	lof	2	2	5	100	50	500	5000	500000	500	500	1	2	2	0	0	0
22315	3	50	50	lof	2	2	5	100	50	500	5000	500000	500	500	1	2	2	0	0	0
22579	3	50	50	lof	2	2	5	100	50	500	5000	500000	500	500	1	3	3	0	0	0
22685	3	50	50	lof	2	2	5	100	50	500	5000	500000	500	500	1	2	2	0	0	0
22288	3	50	50	lof	2	2	5	100	50	500	5000	500000	500	500	1	2	2	0	0	0
22668	3	50	50	lof	2	2	5	100	50	500	5000	500000	500	500	1	2	2	0	0	0
22576	3	50	50	lof	2	2	5	100	50	500	5000	500000	500	500	1	2	2	0	0	0
22559	3	50	50	lof	2	2	5	100	50	500	5000	500000	500	500	1	2	2	0	0	0
22494	3	50	50	lof	2	2	5	100	50	500	5000	500000	500	500	1	2	2	0	0	0
22522	3	50	50	lof	2	2	5	100	50	500	5000	500000	500	500	1	3	5	0	0	0
22672	3	50	50	lof	2	2	5	100	50	500	5000	500000	500	500	1	2	2	0	0	0
22626	3	50	50	lof	2	2	5	100	50	500	5000	500000	500	500	1	2	2	0	0	0
22628	3	50	50	lof	2	2	5	100	50	500	5000	500000	500	500	1	2	2	0	0	0
22414	3	50	50	lof	2	2	5	100	50	500	5000	500000	500	500	1	2	2	0	0	0
22564	3	50	50	lof	2	2	5	100	50	500	5000	500000	500	500	1	3	4	0	0	0
22659	3	50	50	lof	2	2	5	100	50	500	5000	500000	500	500	1	2	2	0	0	0
22721	3	50	50	lof	2	2	5	100	50	500	5000	500000	500	500	1	2	2	0	0	0
22598	3	50	50	lof	2	2	5	100	50	500	5000	500000	500	500	1	2	2	0	0	0
22481	3	50	50	lof	2	2	5	100	50	500	5000	500000	500	500	1	2	2	0	0	0
21825	3	50	50	lof	1	2	5	100	50	500	5000	500000	500	500	1	2	2	0	0	0
22331	3	50	50	lof	2	2	5	100	50	500	5000	500000	500	500	1	2	2	0	0	0
22743	3	50	50	lof	2	2	5	100	50	500	5000	500000	500	500	1	2	2	0	0	0
22572	3	50	50	lof	2	2	5	100	50	500	5000	500000	500	500	1	2	2	0	0	0
22839	3	50	50	lof	2	2	5	100	50	500	5000	500000	500	500	1	2	2	0	0	0
22323	3	50	50	lof	2	2	5	100	50	500	5000	500000	500	500	1	2	2	0	0	0
22696	3	50	50	lof	2	2	5	100	50	500	5000	500000	500	500	1	2	2	0	0	0
22771	3	50	50	lof	2	2	5	100	50	500	5000	500000	500	500	1	2	2	0	0	0
22275	3	50	50	lof	2	2	5	100	50	500	5000	500000	500	500	1	2	2	0	0	0
22904	3	50	50	lof	2	2	5	100	50	500	5000	500000	500	500	1	2	2	0	0	0
22656	3	50	50	lof	2	2	5	100	50	500	5000	500000	500	500	1	2	2	0	0	0
22805	3	50	50	lof	2	2	5	100	50	500	5000	500000	500	500	1	2	2	0	0	0
21657	3	50	50	lof	1	2	5	100	50	500	5000	500000	500	500	1	2	2	0	0	0
22886	3	50	50	lof	2	2	5	100	50	500	5000	500000	500	500	1	3	3	0	0	0
21745	3	50	50	lof	1	2	5	100	50	500	5000	500000	500	500	1	2	2	0	0	0
22855	3	50	50	lof	2	2	5	100	50	500	5000	500000	500	500	1	2	2	0	0	0
23004	3	50	50	lof	3	2	5	100	50	500	5000	500000	500	500	1	2	2	0	0	0
22792	3	50	50	lof	2	2	5	100	50	500	5000	500000	500	500	1	2	2	0	0	0
22763	3	50	50	lof	2	2	5	100	50	500	5000	500000	500	500	1	2	2	0	0	0
22894	3	50	50	lof	2	2	5	100	50	500	5000	500000	500	500	1	2	2	0	0	0
22859	3	50	50	lof	2	2	5	100	50	500	5000	500000	500	500	1	2	2	0	0	0
23130	3	50	50	lof	3	2	5	100	50	500	5000	500000	500	500	1	2	2	0	0	0
22735	3	50	50	lof	2	2	5	100	50	500	5000	500000	500	500	1	2	2	0	0	0
22361	3	50	50	lof	2	2	5	100	50	500	5000	500000	500	500	1	2	2	0	0	0
22993	3	50	50	lof	2	2	5	100	50	500	5000	500000	500	500	1	2	2	0	0	0
22811	3	50	50	lof	2	2	5	100	50	500	5000	500000	500	500	1	3	4	0	0	0
23129	3	50	50	lof	3	2	5	100	50	500	5000	500000	500	500	1	2	2	0	0	0
22803	3	50	50	lof	2	2	5	100	50	500	5000	500000	500	500	1	2	2	0	0	0
22944	3	50	50	lof	2	2	5	100	50	500	5000	500000	500	500	1	2	2	0	0	0
23107	3	50	50	lof	3	2	5	100	50	500	5000	500000	500	500	1	2	2	0	0	0
23181	3	50	50	lof	3	2	5	100	50	500	5000	500000	500	500	1	2	2	0	0	0
23185	3	50	50	lof	3	2	5	100	50	500	5000	500000	500	500	1	2	2	0	0	0
23241	3	50	50	lof	3	2	5	100	50	500	5000	500000	500	500	1	2	2	0	0	0
23030	3	50	50	lof	3	2	5	100	50	500	5000	500000	500	500	1	2	2	0	0	0
22736	3	50	50	lof	2	2	5	100	50	500	5000	500000	500	500	1	3	3	0	0	0
23059	3	50	50	lof	3	2	5	100	50	500	5000	500000	500	500	1	3	4	0	0	0
23261	3	50	50	lof	3	2	5	100	50	500	5000	500000	500	500	1	2	2	0	0	0
23148	3	50	50	lof	3	2	5	100	50	500	5000	500000	500	500	1	2	2	0	0	0
23217	3	50	50	lof	3	2	5	100	50	500	5000	500000	500	500	1	2	2	0	0	0
21698	3	50	50	lof	1	2	5	100	50	500	5000	500000	500	500	1	2	2	0	0	0
23087	3	50	50	lof	3	2	5	100	50	500	5000	500000	500	500	1	2	2	0	0	0
23440	3	50	50	lof	3	2	5	100	50	500	5000	500000	500	500	1	3	3	1	0	0
23207	3	50	50	lof	3	2	5	100	50	500	5000	500000	500	500	1	2	2	0	0	0
23043	3	50	50	lof	3	2	5	100	50	500	5000	500000	500	500	1	3	4	0	0	0
23150	3	50	50	lof	3	2	5	100	50	500	5000	500000	500	500	1	2	2	0	0	0
23196	3	50	50	lof	3	2	5	100	50	500	5000	500000	500	500	1	2	2	0	0	0
22365	3	50	50	lof	2	2	5	100	50	500	5000	500000	500	500	1	2	2	0	0	0
23183	3	50	50	lof	3	2	5	100	50	500	5000	500000	500	500	1	3	3	0	0	0
23516	3	50	50	lof	3	2	5	100	50	500	5000	500000	500	500	1	2	2	0	0	0
23255	3	50	50	lof	3	2	5	100	50	500	5000	500000	500	500	1	3	3	0	0	0
23239	3	50	50	lof	3	2	5	100	50	500	5000	500000	500	500	1	2	2	0	0	0
23333	3	50	50	lof	3	2	5	100	50	500	5000	500000	500	500	1	2	2	0	0	0
23408	3	50	50	lof	3	2	5	100	50	500	5000	500000	500	500	1	2	2	0	0	0
23199	3	50	50	lof	3	2	5	100	50	500	5000	500000	500	500	1	2	2	0	0	0
23249	3	50	50	lof	3	2	5	100	50	500	5000	500000	500	500	1	2	2	0	0	0
22489	3	50	50	lof	2	2	5	100	50	500	5000	500000	500	500	1	3	4	0	0	0
23327	3	50	50	lof	3	2	5	100	50	500	5000	500000	500	500	1	2	2	0	0	0
23391	3	50	50	lof	3	2	5	100	50	500	5000	500000	500	500	1	2	2	0	0	0
23331	3	50	50	lof	3	2	5	100	50	500	5000	500000	500	500	1	2	2	0	0	0
22752	3	50	50	lof	2	2	5	100	50	500	5000	500000	500	500	1	2	2	0	0	0
23476	3	50	50	lof	3	2	5	100	50	500	5000	500000	500	500	1	2	2	0	0	0
23018	3	50	50	lof	3	2	5	100	50	500	5000	500000	500	500	1	2	2	0	0	0
23330	3	50	50	lof	3	2	5	100	50	500	5000	500000	500	500	1	2	2	0	0	0
23451	3	50	50	lof	3	2	5	100	50	500	5000	500000	500	500	1	2	2	0	0	0
23509	3	50	50	lof	3	2	5	100	50	500	5000	500000	500	500	1	3	4	0	0	0
23176	3	50	50	lof	3	2	5	100	50	500	5000	500000	500	500	1	2	2	0	0	0
23411	3	50	50	lof	3	2	5	100	50	500	5000	500000	500	500	1	2	2	0	0	0
23599	3	50	50	lof	3	2	5	100	50	500	5000	500000	500	500	1	2	2	0	0	0
23495	3	50	50	lof	3	2	5	100	50	500	5000	500000	500	500	1	2	2	0	0	0
23144	3	50	50	lof	3	2	5	100	50	500	5000	500000	500	500	1	2	2	0	0	0
23367	3	50	50	lof	3	2	5	100	50	500	5000	500000	500	500	1	3	3	0	0	0
22789	3	50	50	lof	2	2	5	100	50	500	5000	500000	500	500	1	3	3	0	0	0
23260	3	50	50	lof	3	2	5	100	50	500	5000	500000	500	500	1	2	2	0	0	0
23314	3	50	50	lof	3	2	5	100	50	500	5000	500000	500	500	1	2	2	0	0	0
23521	3	50	50	lof	3	2	5	100	50	500	5000	500000	500	500	1	2	2	0	0	0
23575	3	50	50	lof	3	2	5	100	50	500	5000	500000	500	500	1	2	2	0	0	0
23460	3	50	50	lof	3	2	5	100	50	500	5000	500000	500	500	1	2	2	0	0	0
23605	3	50	50	lof	3	2	5	100	50	500	5000	500000	500	500	1	3	3	0	0	0
23499	3	50	50	lof	3	2	5	100	50	500	5000	500000	500	500	1	2	2	0	0	0
23604	3	50	50	lof	3	2	5	100	50	500	5000	500000	500	500	1	2	2	0	0	0
23050	3	50	50	lof	3	2	5	100	50	500	5000	500000	500	500	1	2	2	0	0	0
23387	3	50	50	lof	3	2	5	100	50	500	5000	500000	500	500	1	2	2	0	0	0
23612	3	50	50	lof	3	2	5	100	50	500	5000	500000	500	500	1	2	2	0	0	0
22301	3	50	50	lof	2	2	5	100	50	500	5000	500000	500	500	1	2	2	0	0	0
23235	3	50	50	lof	3	2	5	100	50	500	5000	500000	500	500	1	2	2	0	0	0
23712	3	50	50	lof	3	2	5	100	50	500	5000	500000	500	500	1	2	2	0	0	0
23487	3	50	50	lof	3	2	5	100	50	500	5000	500000	500	500	1	2	2	0	0	0
23698	3	50	50	lof	3	2	5	100	50	500	5000	500000	500	500	1	2	2	0	0	0
23579	3	50	50	lof	3	2	5	100	50	500	5000	500000	500	500	1	2	2	0	0	0
23732	3	50	50	lof	3	2	5	100	50	500	5000	500000	500	500	1	3	3	1	0	0
23733	3	50	50	lof	3	2	5	100	50	500	5000	500000	500	500	1	2	2	0	0	0
23473	3	50	50	lof	3	2	5	100	50	500	5000	500000	500	500	1	2	2	0	0	0
23744	3	50	50	lof	3	2	5	100	50	500	5000	500000	500	500	1	2	2	0	0	0
23644	3	50	50	lof	3	2	5	100	50	500	5000	500000	500	500	1	2	2	0	0	0
23779	3	50	50	lof	3	2	5	100	50	500	5000	500000	500	500	1	2	2	0	1	1
23143	3	50	50	lof	3	2	5	100	50	500	5000	500000	500	500	1	2	2	0	0	0
23683	3	50	50	lof	3	2	5	100	50	500	5000	500000	500	500	1	2	2	0	0	0
23618	3	50	50	lof	3	2	5	100	50	500	5000	500000	500	500	1	3	4	0	0	0
23915	3	50	50	lof	3	2	5	100	50	500	5000	500000	500	500	1	2	2	0	0	0
24076	3	50	50	lof	4	2	5	100	50	500	5000	500000	500	500	1	2	2	0	0	0
23895	3	50	50	lof	3	2	5	100	50	500	5000	500000	500	500	1	2	2	0	1	1
23912	3	50	50	lof	3	2	5	100	50	500	5000	500000	500	500	1	3	4	0	0	0
23511	3	50	50	lof	3	2	5	100	50	500	5000	500000	500	500	1	3	3	0	0	0
23750	3	50	50	lof	3	2	5	100	50	500	5000	500000	500	500	1	2	2	0	0	0
23926	3	50	50	lof	3	2	5	100	50	500	5000	500000	500	500	1	2	2	0	0	0
23730	3	50	50	lof	3	2	5	100	50	500	5000	500000	500	500	1	2	2	0	0	0
23962	3	50	50	lof	3	2	5	100	50	500	5000	500000	500	500	1	2	2	0	0	0
23715	3	50	50	lof	3	2	5	100	50	500	5000	500000	500	500	1	2	2	0	0	0
23842	3	50	50	lof	3	2	5	100	50	500	5000	500000	500	500	1	2	2	0	0	0
23829	3	50	50	lof	3	2	5	100	50	500	5000	500000	500	500	1	2	2	0	0	0
23851	3	50	50	lof	3	2	5	100	50	500	5000	500000	500	500	1	3	3	0	0	0
23956	3	50	50	lof	3	2	5	100	50	500	5000	500000	500	500	1	2	2	0	0	0
23741	3	50	50	lof	3	2	5	100	50	500	5000	500000	500	500	1	3	4	1	0	0
23812	3	50	50	lof	3	2	5	100	50	500	5000	500000	500	500	1	2	2	0	0	0
23654	3	50	50	lof	3	2	5	100	50	500	5000	500000	500	500	1	2	2	0	0	0
24004	3	50	50	lof	4	2	5	100	50	500	5000	500000	500	500	1	2	2	0	0	0
24095	3	50	50	lof	4	2	5	100	50	500	5000	500000	500	500	1	2	2	0	0	0
23946	3	50	50	lof	3	2	5	100	50	500	5000	500000	500	500	1	2	2	0	0	0
23991	3	50	50	lof	3	2	5	100	50	500	5000	500000	500	500	1	2	2	0	0	0
23756	3	50	50	lof	3	2	5	100	50	500	5000	500000	500	500	1	2	2	0	0	0
23998	3	50	50	lof	3	2	5	100	50	500	5000	500000	500	500	1	2	2	0	0	0
24096	3	50	50	lof	4	2	5	100	50	500	5000	500000	500	500	1	2	2	0	0	0
24010	3	50	50	lof	4	2	5	100	50	500	5000	500000	500	500	1	2	2	0	0	0
23974	3	50	50	lof	3	2	5	100	50	500	5000	500000	500	500	1	2	2	0	0	0
24094	3	50	50	lof	4	2	5	100	50	500	5000	500000	500	500	1	2	2	0	0	0
23854	3	50	50	lof	3	2	5	100	50	500	5000	500000	500	500	1	3	3	0	0	0
23929	3	50	50	lof	3	2	5	100	50	500	5000	500000	500	500	1	2	2	0	0	0
23949	3	50	50	lof	3	2	5	100	50	500	5000	500000	500	500	1	2	2	0	0	0
24079	3	50	50	lof	4	2	5	100	50	500	5000	500000	500	500	1	2	2	0	0	0
24054	3	50	50	lof	4	2	5	100	50	500	5000	500000	500	500	1	2	2	0	0	0
22524	3	50	50	lof	2	2	5	100	50	500	5000	500000	500	500	1	2	2	0	1	1
24121	3	50	50	lof	4	2	5	100	50	500	5000	500000	500	500	1	2	2	0	0	0
24080	3	50	50	lof	4	2	5	100	50	500	5000	500000	500	500	1	2	2	0	0	0
24088	3	50	50	lof	4	2	5	100	50	500	5000	500000	500	500	1	2	2	0	0	0
24173	3	50	50	lof	4	2	5	100	50	500	5000	500000	500	500	1	2	2	0	0	0
24149	3	50	50	lof	4	2	5	100	50	500	5000	500000	500	500	1	2	2	0	0	0
24187	3	50	50	lof	4	2	5	100	50	500	5000	500000	500	500	1	2	2	0	0	0
24158	3	50	50	lof	4	2	5	100	50	500	5000	500000	500	500	1	2	2	0	0	0
24327	3	50	50	lof	4	2	5	100	50	500	5000	500000	500	500	1	2	2	0	0	0
24075	3	50	50	lof	4	2	5	100	50	500	5000	500000	500	500	1	2	2	0	0	0
22924	3	50	50	lof	2	2	5	100	50	500	5000	500000	500	500	1	2	2	0	0	0
24254	3	50	50	lof	4	2	5	100	50	500	5000	500000	500	500	1	2	2	0	0	0
23917	3	50	50	lof	3	2	5	100	50	500	5000	500000	500	500	1	2	2	0	0	0
24388	3	50	50	lof	4	2	5	100	50	500	5000	500000	500	500	1	2	2	0	0	0
24350	3	50	50	lof	4	2	5	100	50	500	5000	500000	500	500	1	2	2	0	0	0
24450	3	50	50	lof	4	2	5	100	50	500	5000	500000	500	500	1	2	2	0	0	0
22801	3	50	50	lof	2	2	5	100	50	500	5000	500000	500	500	1	2	2	0	0	0
23985	3	50	50	lof	3	2	5	100	50	500	5000	500000	500	500	1	2	2	0	0	0
23800	3	50	50	lof	3	2	5	100	50	500	5000	500000	500	500	1	2	2	0	0	0
24338	3	50	50	lof	4	2	5	100	50	500	5000	500000	500	500	1	3	5	0	0	0
24212	3	50	50	lof	4	2	5	100	50	500	5000	500000	500	500	1	2	2	0	0	0
23878	3	50	50	lof	3	2	5	100	50	500	5000	500000	500	500	1	3	5	0	0	0
24105	3	50	50	lof	4	2	5	100	50	500	5000	500000	500	500	1	3	4	0	0	0
24315	3	50	50	lof	4	2	5	100	50	500	5000	500000	500	500	1	2	2	0	0	0
24189	3	50	50	lof	4	2	5	100	50	500	5000	500000	500	500	1	2	2	0	0	0
24432	3	50	50	lof	4	2	5	100	50	500	5000	500000	500	500	1	2	2	0	0	0
24407	3	50	50	lof	4	2	5	100	50	500	5000	500000	500	500	1	2	2	0	0	0
24489	3	50	50	lof	4	2	5	100	50	500	5000	500000	500	500	1	2	2	0	0	0
24412	3	50	50	lof	4	2	5	100	50	500	5000	500000	500	500	1	3	3	0	0	0
24470	3	50	50	lof	4	2	5	100	50	500	5000	500000	500	500	1	2	2	0	0	0
24362	3	50	50	lof	4	2	5	100	50	500	5000	500000	500	500	1	2	2	0	0	0
24399	3	50	50	lof	4	2	5	100	50	500	5000	500000	500	500	1	2	2	0	0	0
24546	3	50	50	lof	4	2	5	100	50	500	5000	500000	500	500	1	2	2	0	0	0
23280	3	50	50	lof	3	2	5	100	50	500	5000	500000	500	500	1	2	2	0	0	0
24500	3	50	50	lof	4	2	5	100	50	500	5000	500000	500	500	1	3	3	1	0	0
24475	3	50	50	lof	4	2	5	100	50	500	5000	500000	500	500	1	2	2	0	0	0
23539	3	50	50	lof	3	2	5	100	50	500	5000	500000	500	500	1	2	2	0	1	1
24511	3	50	50	lof	4	2	5	100	50	500	5000	500000	500	500	1	2	2	0	0	0
23805	3	50	50	lof	3	2	5	100	50	500	5000	500000	500	500	1	2	2	0	0	0
24485	3	50	50	lof	4	2	5	100	50	500	5000	500000	500	500	1	2	2	0	0	0
24559	3	50	50	lof	4	2	5	100	50	500	5000	500000	500	500	1	2	2	0	0	0
24625	3	50	50	lof	4	2	5	100	50	500	5000	500000	500	500	1	2	2	0	0	0
24449	3	50	50	lof	4	2	5	100	50	500	5000	500000	500	500	1	2	2	0	0	0
24131	3	50	50	lof	4	2	5	100	50	500	5000	500000	500	500	1	2	2	0	0	0
24571	3	50	50	lof	4	2	5	100	50	500	5000	500000	500	500	1	2	2	0	0	0
24586	3	50	50	lof	4	2	5	100	50	500	5000	500000	500	500	1	2	2	0	0	0
24273	3	50	50	lof	4	2	5	100	50	500	5000	500000	500	500	1	2	2	0	0	0
24596	3	50	50	lof	4	2	5	100	50	500	5000	500000	500	500	1	2	2	0	0	0
24607	3	50	50	lof	4	2	5	100	50	500	5000	500000	500	500	1	2	2	0	0	0
23484	3	50	50	lof	3	2	5	100	50	500	5000	500000	500	500	1	3	3	0	0	0
24718	3	50	50	lof	4	2	5	100	50	500	5000	500000	500	500	1	2	2	0	0	0
24662	3	50	50	lof	4	2	5	100	50	500	5000	500000	500	500	1	2	2	0	0	0
24738	3	50	50	lof	4	2	5	100	50	500	5000	500000	500	500	1	2	2	0	0	0
24664	3	50	50	lof	4	2	5	100	50	500	5000	500000	500	500	1	3	5	0	0	0
24681	3	50	50	lof	4	2	5	100	50	500	5000	500000	500	500	1	2	2	0	0	0
24671	3	50	50	lof	4	2	5	100	50	500	5000	500000	500	500	1	3	3	0	0	0
24785	3	50	50	lof	4	2	5	100	50	500	5000	500000	500	500	1	2	2	0	0	0
24560	3	50	50	lof	4	2	5	100	50	500	5000	500000	500	500	1	3	3	0	0	0
24747	3	50	50	lof	4	2	5	100	50	500	5000	500000	500	500	1	3	4	0	0	0
24729	3	50	50	lof	4	2	5	100	50	500	5000	500000	500	500	1	2	2	0	0	0
24791	3	50	50	lof	4	2	5	100	50	500	5000	500000	500	500	1	2	2	0	0	0
24606	3	50	50	lof	4	2	5	100	50	500	5000	500000	500	500	1	2	2	0	0	0
24818	3	50	50	lof	4	2	5	100	50	500	5000	500000	500	500	1	3	3	0	0	0
24731	3	50	50	lof	4	2	5	100	50	500	5000	500000	500	500	1	2	2	0	0	0
24613	3	50	50	lof	4	2	5	100	50	500	5000	500000	500	500	1	3	3	1	0	0
24940	3	50	50	lof	4	2	5	100	50	500	5000	500000	500	500	1	3	3	0	0	0
24849	3	50	50	lof	4	2	5	100	50	500	5000	500000	500	500	1	2	2	0	0	0
24805	3	50	50	lof	4	2	5	100	50	500	5000	500000	500	500	1	3	4	0	0	0
24758	3	50	50	lof	4	2	5	100	50	500	5000	500000	500	500	1	2	2	0	0	0
24760	3	50	50	lof	4	2	5	100	50	500	5000	500000	500	500	1	2	2	0	0	0
24913	3	50	50	lof	4	2	5	100	50	500	5000	500000	500	500	1	2	2	0	0	0
24835	3	50	50	lof	4	2	5	100	50	500	5000	500000	500	500	1	3	3	0	0	0
24592	3	50	50	lof	4	2	5	100	50	500	5000	500000	500	500	1	3	4	0	0	0
24881	3	50	50	lof	4	2	5	100	50	500	5000	500000	500	500	1	3	3	1	0	0
24657	3	50	50	lof	4	2	5	100	50	500	5000	500000	500	500	1	3	4	0	0	0
23993	3	50	50	lof	3	2	5	100	50	500	5000	500000	500	500	1	2	2	0	0	0
24794	3	50	50	lof	4	2	5	100	50	500	5000	500000	500	500	1	2	2	0	0	0
24844	3	50	50	lof	4	2	5	100	50	500	5000	500000	500	500	1	2	2	0	0	0
24998	3	50	50	lof	4	2	5	100	50	500	5000	500000	500	500	1	2	2	0	0	0
24821	3	50	50	lof	4	2	5	100	50	500	5000	500000	500	500	1	3	3	0	0	0
24132	3	50	50	lof	4	2	5	100	50	500	5000	500000	500	500	1	2	2	0	0	0
24438	3	50	50	lof	4	2	5	100	50	500	5000	500000	500	500	1	2	2	0	0	0
24594	3	50	50	lof	4	2	5	100	50	500	5000	500000	500	500	1	3	4	0	0	0
24591	3	50	50	lof	4	2	5	100	50	500	5000	500000	500	500	1	2	2	0	0	0
24994	3	50	50	lof	4	2	5	100	50	500	5000	500000	500	500	1	2	2	0	0	0
24804	3	50	50	lof	4	2	5	100	50	500	5000	500000	500	500	1	2	2	0	0	0
24976	3	50	50	lof	4	2	5	100	50	500	5000	500000	500	500	1	2	2	0	0	0
24906	3	50	50	lof	4	2	5	100	50	500	5000	500000	500	500	1	2	2	0	0	0
25028	3	50	50	gof	0	2	5	100	50	500	5000	500000	500	500	1	2	2	0	0	0
24715	3	50	50	lof	4	2	5	100	50	500	5000	500000	500	500	1	2	2	0	0	0
24687	3	50	50	lof	4	2	5	100	50	500	5000	500000	500	500	1	2	2	0	0	0
25065	3	50	50	gof	0	2	5	100	50	500	5000	500000	500	500	1	2	2	0	0	0
24984	3	50	50	lof	4	2	5	100	50	500	5000	500000	500	500	1	2	2	0	1	1
24944	3	50	50	lof	4	2	5	100	50	500	5000	500000	500	500	1	3	4	0	0	0
24711	3	50	50	lof	4	2	5	100	50	500	5000	500000	500	500	1	2	2	0	0	0
25059	3	50	50	gof	0	2	5	100	50	500	5000	500000	500	500	1	2	2	0	0	0
24902	3	50	50	lof	4	2	5	100	50	500	5000	500000	500	500	1	2	2	0	0	0
24414	3	50	50	lof	4	2	5	100	50	500	5000	500000	500	500	1	2	2	0	0	0
25105	3	50	50	gof	0	2	5	100	50	500	5000	500000	500	500	1	3	4	0	0	0
25287	3	50	50	gof	0	2	5	100	50	500	5000	500000	500	500	1	2	2	0	0	0
24795	3	50	50	lof	4	2	5	100	50	500	5000	500000	500	500	1	2	2	0	0	0
25222	3	50	50	gof	0	2	5	100	50	500	5000	500000	500	500	1	2	2	0	0	0
25084	3	50	50	gof	0	2	5	100	50	500	5000	500000	500	500	1	2	2	0	0	0
25142	3	50	50	gof	0	2	5	100	50	500	5000	500000	500	500	1	2	2	0	0	0
25269	3	50	50	gof	0	2	5	100	50	500	5000	500000	500	500	1	2	2	0	0	0
25320	3	50	50	gof	0	2	5	100	50	500	5000	500000	500	500	1	2	2	0	0	0
25298	3	50	50	gof	0	2	5	100	50	500	5000	500000	500	500	1	2	2	0	0	0
25369	3	50	50	gof	0	2	5	100	50	500	5000	500000	500	500	1	2	2	0	0	0
25198	3	50	50	gof	0	2	5	100	50	500	5000	500000	500	500	1	3	3	0	0	0
25360	3	50	50	gof	0	2	5	100	50	500	5000	500000	500	500	1	3	4	0	0	0
25337	3	50	50	gof	0	2	5	100	50	500	5000	500000	500	500	1	3	4	0	0	0
25332	3	50	50	gof	0	2	5	100	50	500	5000	500000	500	500	1	2	2	0	0	0
25136	3	50	50	gof	0	2	5	100	50	500	5000	500000	500	500	1	3	4	0	0	0
25214	3	50	50	gof	0	2	5	100	50	500	5000	500000	500	500	1	3	5	0	0	0
25203	3	50	50	gof	0	2	5	100	50	500	5000	500000	500	500	1	2	2	0	0	0
25076	3	50	50	gof	0	2	5	100	50	500	5000	500000	500	500	1	3	4	0	0	0
25159	3	50	50	gof	0	2	5	100	50	500	5000	500000	500	500	1	2	2	0	0	0
25294	3	50	50	gof	0	2	5	100	50	500	5000	500000	500	500	1	2	2	0	1	1
25208	3	50	50	gof	0	2	5	100	50	500	5000	500000	500	500	1	2	2	0	0	0
24868	3	50	50	lof	4	2	5	100	50	500	5000	500000	500	500	1	2	2	0	0	0
25281	3	50	50	gof	0	2	5	100	50	500	5000	500000	500	500	1	3	4	0	0	0
25335	3	50	50	gof	0	2	5	100	50	500	5000	500000	500	500	1	2	2	0	0	0
25350	3	50	50	gof	0	2	5	100	50	500	5000	500000	500	500	1	2	2	0	0	0
24918	3	50	50	lof	4	2	5	100	50	500	5000	500000	500	500	1	2	2	0	0	0
25472	3	50	50	gof	0	2	5	100	50	500	5000	500000	500	500	1	2	2	0	0	0
24539	3	50	50	lof	4	2	5	100	50	500	5000	500000	500	500	1	2	2	0	0	0
25327	3	50	50	gof	0	2	5	100	50	500	5000	500000	500	500	1	2	2	0	0	0
25223	3	50	50	gof	0	2	5	100	50	500	5000	500000	500	500	1	2	2	0	0	0
25370	3	50	50	gof	0	2	5	100	50	500	5000	500000	500	500	1	3	4	0	0	0
24544	3	50	50	lof	4	2	5	100	50	500	5000	500000	500	500	1	2	2	0	0	0
25420	3	50	50	gof	0	2	5	100	50	500	5000	500000	500	500	1	2	2	0	0	0
25354	3	50	50	gof	0	2	5	100	50	500	5000	500000	500	500	1	2	2	0	0	0
25423	3	50	50	gof	0	2	5	100	50	500	5000	500000	500	500	1	2	2	0	0	0
25456	3	50	50	gof	0	2	5	100	50	500	5000	500000	500	500	1	2	2	0	0	0
25325	3	50	50	gof	0	2	5	100	50	500	5000	500000	500	500	1	2	2	0	0	0
25426	3	50	50	gof	0	2	5	100	50	500	5000	500000	500	500	1	2	2	0	0	0
25385	3	50	50	gof	0	2	5	100	50	500	5000	500000	500	500	1	3	4	0	0	0
25229	3	50	50	gof	0	2	5	100	50	500	5000	500000	500	500	1	2	2	0	0	0
25346	3	50	50	gof	0	2	5	100	50	500	5000	500000	500	500	1	2	2	0	0	0
25467	3	50	50	gof	0	2	5	100	50	500	5000	500000	500	500	1	2	2	0	0	0
24068	3	50	50	lof	4	2	5	100	50	500	5000	500000	500	500	1	2	2	0	0	0
25475	3	50	50	gof	0	2	5	100	50	500	5000	500000	500	500	1	2	2	0	0	0
25191	3	50	50	gof	0	2	5	100	50	500	5000	500000	500	500	1	3	4	0	0	0
25396	3	50	50	gof	0	2	5	100	50	500	5000	500000	500	500	1	3	4	0	0	0
25649	3	50	50	gof	0	2	5	100	50	500	5000	500000	500	500	1	3	3	0	0	0
25211	3	50	50	gof	0	2	5	100	50	500	5000	500000	500	500	1	2	2	0	0	0
25626	3	50	50	gof	0	2	5	100	50	500	5000	500000	500	500	1	2	2	0	0	0
25689	3	50	50	gof	0	2	5	100	50	500	5000	500000	500	500	1	2	2	0	0	0
25312	3	50	50	gof	0	2	5	100	50	500	5000	500000	500	500	1	3	4	0	0	0
25412	3	50	50	gof	0	2	5	100	50	500	5000	500000	500	500	1	2	2	0	0	0
25738	3	50	50	gof	0	2	5	100	50	500	5000	500000	500	500	1	2	2	0	0	0
25595	3	50	50	gof	0	2	5	100	50	500	5000	500000	500	500	1	2	2	0	0	0
25622	3	50	50	gof	0	2	5	100	50	500	5000	500000	500	500	1	2	2	0	0	0
25481	3	50	50	gof	0	2	5	100	50	500	5000	500000	500	500	1	2	2	0	0	0
25687	3	50	50	gof	0	2	5	100	50	500	5000	500000	500	500	1	2	2	0	0	0
25534	3	50	50	gof	0	2	5	100	50	500	5000	500000	500	500	1	2	2	0	0	0
25765	3	50	50	gof	0	2	5	100	50	500	5000	500000	500	500	1	2	2	0	0	0
25482	3	50	50	gof	0	2	5	100	50	500	5000	500000	500	500	1	2	2	0	0	0
25621	3	50	50	gof	0	2	5	100	50	500	5000	500000	500	500	1	3	3	0	0	0
25697	3	50	50	gof	0	2	5	100	50	500	5000	500000	500	500	1	2	2	0	0	0
25594	3	50	50	gof	0	2	5	100	50	500	5000	500000	500	500	1	3	3	0	0	0
25760	3	50	50	gof	0	2	5	100	50	500	5000	500000	500	500	1	2	2	0	0	0
25529	3	50	50	gof	0	2	5	100	50	500	5000	500000	500	500	1	2	2	0	0	0
25657	3	50	50	gof	0	2	5	100	50	500	5000	500000	500	500	1	2	2	0	0	0
25582	3	50	50	gof	0	2	5	100	50	500	5000	500000	500	500	1	2	2	0	0	0
25477	3	50	50	gof	0	2	5	100	50	500	5000	500000	500	500	1	2	2	0	0	0
25743	3	50	50	gof	0	2	5	100	50	500	5000	500000	500	500	1	2	2	0	0	0
25187	3	50	50	gof	0	2	5	100	50	500	5000	500000	500	500	1	3	4	0	0	0
25654	3	50	50	gof	0	2	5	100	50	500	5000	500000	500	500	1	2	2	0	0	0
25835	3	50	50	gof	0	2	5	100	50	500	5000	500000	500	500	1	3	3	0	0	0
25773	3	50	50	gof	0	2	5	100	50	500	5000	500000	500	500	1	2	2	0	0	0
25651	3	50	50	gof	0	2	5	100	50	500	5000	500000	500	500	1	3	3	0	0	0
25861	3	50	50	gof	0	2	5	100	50	500	5000	500000	500	500	1	3	3	1	0	0
25841	3	50	50	gof	0	2	5	100	50	500	5000	500000	500	500	1	3	5	0	0	0
25690	3	50	50	gof	0	2	5	100	50	500	5000	500000	500	500	1	2	2	0	0	0
25869	3	50	50	gof	0	2	5	100	50	500	5000	500000	500	500	1	3	3	0	0	0
25898	3	50	50	gof	0	2	5	100	50	500	5000	500000	500	500	1	2	2	0	0	0
25528	3	50	50	gof	0	2	5	100	50	500	5000	500000	500	500	1	2	2	0	0	0
25853	3	50	50	gof	0	2	5	100	50	500	5000	500000	500	500	1	2	2	0	0	0
25818	3	50	50	gof	0	2	5	100	50	500	5000	500000	500	500	1	2	2	0	0	0
25785	3	50	50	gof	0	2	5	100	50	500	5000	500000	500	500	1	3	4	0	0	0
25531	3	50	50	gof	0	2	5	100	50	500	5000	500000	500	500	1	2	2	0	0	0
25739	3	50	50	gof	0	2	5	100	50	500	5000	500000	500	500	1	3	3	0	0	0
25844	3	50	50	gof	0	2	5	100	50	500	5000	500000	500	500	1	3	3	0	0	0
25984	3	50	50	gof	0	2	5	100	50	500	5000	500000	500	500	1	2	2	0	0	0
25722	3	50	50	gof	0	2	5	100	50	500	5000	500000	500	500	1	2	2	0	0	0
26004	3	50	50	gof	1	2	5	100	50	500	5000	500000	500	500	1	2	2	0	0	0
26061	3	50	50	gof	1	2	5	100	50	500	5000	500000	500	500	1	2	2	0	0	0
26085	3	50	50	gof	1	2	5	100	50	500	5000	500000	500	500	1	2	2	0	0	0
25753	3	50	50	gof	0	2	5	100	50	500	5000	500000	500	500	1	2	2	0	0	0
26158	3	50	50	gof	1	2	5	100	50	500	5000	500000	500	500	1	2	2	0	0	0
26214	3	50	50	gof	1	2	5	100	50	500	5000	500000	500	500	1	2	2	0	0	0
26410	3	50	50	gof	1	2	5	100	50	500	5000	500000	500	500	1	2	2	0	1	1
25940	3	50	50	gof	0	2	5	100	50	500	5000	500000	500	500	1	2	2	0	0	0
26113	3	50	50	gof	1	2	5	100	50	500	5000	500000	500	500	1	3	4	0	0	0
26206	3	50	50	gof	1	2	5	100	50	500	5000	500000	500	500	1	2	2	0	0	0
26186	3	50	50	gof	1	2	5	100	50	500	5000	500000	500	500	1	2	2	0	0	0
25781	3	50	50	gof	0	2	5	100	50	500	5000	500000	500	500	1	2	2	0	0	0
26043	3	50	50	gof	1	2	5	100	50	500	5000	500000	500	500	1	2	2	0	0	0
26291	3	50	50	gof	1	2	5	100	50	500	5000	500000	500	500	1	3	3	0	0	0
26129	3	50	50	gof	1	2	5	100	50	500	5000	500000	500	500	1	2	2	0	0	0
26046	3	50	50	gof	1	2	5	100	50	500	5000	500000	500	500	1	3	3	0	0	0
26110	3	50	50	gof	1	2	5	100	50	500	5000	500000	500	500	1	2	2	0	0	0
25604	3	50	50	gof	0	2	5	100	50	500	5000	500000	500	500	1	3	4	0	0	0
26262	3	50	50	gof	1	2	5	100	50	500	5000	500000	500	500	1	2	2	0	0	0
26323	3	50	50	gof	1	2	5	100	50	500	5000	500000	500	500	1	2	2	0	0	0
25925	3	50	50	gof	0	2	5	100	50	500	5000	500000	500	500	1	2	2	0	0	0
26251	3	50	50	gof	1	2	5	100	50	500	5000	500000	500	500	1	2	2	0	0	0
26362	3	50	50	gof	1	2	5	100	50	500	5000	500000	500	500	1	3	3	0	0	0
26377	3	50	50	gof	1	2	5	100	50	500	5000	500000	500	500	1	2	2	0	0	0
26447	3	50	50	gof	1	2	5	100	50	500	5000	500000	500	500	1	3	3	1	0	0
25344	3	50	50	gof	0	2	5	100	50	500	5000	500000	500	500	1	3	4	0	0	0
26430	3	50	50	gof	1	2	5	100	50	500	5000	500000	500	500	1	2	2	0	0	0
26128	3	50	50	gof	1	2	5	100	50	500	5000	500000	500	500	1	2	2	0	0	0
26191	3	50	50	gof	1	2	5	100	50	500	5000	500000	500	500	1	2	2	0	0	0
25053	3	50	50	gof	0	2	5	100	50	500	5000	500000	500	500	1	2	2	0	0	0
26425	3	50	50	gof	1	2	5	100	50	500	5000	500000	500	500	1	2	2	0	0	0
26462	3	50	50	gof	1	2	5	100	50	500	5000	500000	500	500	1	3	3	1	0	0
26025	3	50	50	gof	1	2	5	100	50	500	5000	500000	500	500	1	2	2	0	0	0
26400	3	50	50	gof	1	2	5	100	50	500	5000	500000	500	500	1	2	2	0	0	0
26096	3	50	50	gof	1	2	5	100	50	500	5000	500000	500	500	1	2	2	0	0	0
26565	3	50	50	gof	1	2	5	100	50	500	5000	500000	500	500	1	3	3	0	0	0
26356	3	50	50	gof	1	2	5	100	50	500	5000	500000	500	500	1	2	2	0	0	0
26393	3	50	50	gof	1	2	5	100	50	500	5000	500000	500	500	1	3	3	0	0	0
26468	3	50	50	gof	1	2	5	100	50	500	5000	500000	500	500	1	2	2	0	0	0
25910	3	50	50	gof	0	2	5	100	50	500	5000	500000	500	500	1	3	3	0	0	0
26474	3	50	50	gof	1	2	5	100	50	500	5000	500000	500	500	1	2	2	0	0	0
26529	3	50	50	gof	1	2	5	100	50	500	5000	500000	500	500	1	2	2	0	0	0
26612	3	50	50	gof	1	2	5	100	50	500	5000	500000	500	500	1	2	2	0	0	0
26542	3	50	50	gof	1	2	5	100	50	500	5000	500000	500	500	1	2	2	0	0	0
26570	3	50	50	gof	1	2	5	100	50	500	5000	500000	500	500	1	2	2	0	0	0
26547	3	50	50	gof	1	2	5	100	50	500	5000	500000	500	500	1	2	2	0	0	0
26553	3	50	50	gof	1	2	5	100	50	500	5000	500000	500	500	1	2	2	0	0	0
26313	3	50	50	gof	1	2	5	100	50	500	5000	500000	500	500	1	2	2	0	0	0
26618	3	50	50	gof	1	2	5	100	50	500	5000	500000	500	500	1	2	2	0	0	0
26126	3	50	50	gof	1	2	5	100	50	500	5000	500000	500	500	1	3	4	0	0	0
26577	3	50	50	gof	1	2	5	100	50	500	5000	500000	500	500	1	2	2	0	0	0
26519	3	50	50	gof	1	2	5	100	50	500	5000	500000	500	500	1	2	2	0	0	0
26546	3	50	50	gof	1	2	5	100	50	500	5000	500000	500	500	1	2	2	0	0	0
26589	3	50	50	gof	1	2	5	100	50	500	5000	500000	500	500	1	3	3	0	0	0
25998	3	50	50	gof	0	2	5	100	50	500	5000	500000	500	500	1	2	2	0	0	0
26496	3	50	50	gof	1	2	5	100	50	500	5000	500000	500	500	1	2	2	0	0	0
26659	3	50	50	gof	1	2	5	100	50	500	5000	500000	500	500	1	2	2	0	0	0
26515	3	50	50	gof	1	2	5	100	50	500	5000	500000	500	500	1	2	2	0	0	0
25121	3	50	50	gof	0	2	5	100	50	500	5000	500000	500	500	1	2	2	0	0	0
25270	3	50	50	gof	0	2	5	100	50	500	5000	500000	500	500	1	2	2	0	0	0
26095	3	50	50	gof	1	2	5	100	50	500	5000	500000	500	500	1	3	4	0	0	0
26057	3	50	50	gof	1	2	5	100	50	500	5000	500000	500	500	1	3	4	0	0	0
26604	3	50	50	gof	1	2	5	100	50	500	5000	500000	500	500	1	2	2	0	0	0
26799	3	50	50	gof	1	2	5	100	50	500	5000	500000	500	500	1	2	2	0	0	0
26765	3	50	50	gof	1	2	5	100	50	500	5000	500000	500	500	1	2	2	0	0	0
26733	3	50	50	gof	1	2	5	100	50	500	5000	500000	500	500	1	2	2	0	0	0
26617	3	50	50	gof	1	2	5	100	50	500	5000	500000	500	500	1	2	2	0	0	0
26429	3	50	50	gof	1	2	5	100	50	500	5000	500000	500	500	1	2	2	0	0	0
26814	3	50	50	gof	1	2	5	100	50	500	5000	500000	500	500	1	2	2	0	0	0
26696	3	50	50	gof	1	2	5	100	50	500	5000	500000	500	500	1	2	2	0	0	0
26860	3	50	50	gof	1	2	5	100	50	500	5000	500000	500	500	1	2	2	0	0	0
26927	3	50	50	gof	1	2	5	100	50	500	5000	500000	500	500	1	2	2	0	0	0
26756	3	50	50	gof	1	2	5	100	50	500	5000	500000	500	500	1	2	2	0	0	0
26990	3	50	50	gof	1	2	5	100	50	500	5000	500000	500	500	1	2	2	0	0	0
26672	3	50	50	gof	1	2	5	100	50	500	5000	500000	500	500	1	2	2	0	0	0
26934	3	50	50	gof	1	2	5	100	50	500	5000	500000	500	500	1	2	2	0	0	0
26922	3	50	50	gof	1	2	5	100	50	500	5000	500000	500	500	1	2	2	0	0	0
26970	3	50	50	gof	1	2	5	100	50	500	5000	500000	500	500	1	2	2	0	0	0
26668	3	50	50	gof	1	2	5	100	50	500	5000	500000	500	500	1	2	2	0	0	0
26917	3	50	50	gof	1	2	5	100	50	500	5000	500000	500	500	1	2	2	0	0	0
26348	3	50	50	gof	1	2	5	100	50	500	5000	500000	500	500	1	3	3	0	0	0
26899	3	50	50	gof	1	2	5	100	50	500	5000	500000	500	500	1	2	2	0	0	0
26769	3	50	50	gof	1	2	5	100	50	500	5000	500000	500	500	1	2	2	0	0	0
27028	3	50	50	gof	2	2	5	100	50	500	5000	500000	500	500	1	3	4	0	0	0
26985	3	50	50	gof	1	2	5	100	50	500	5000	500000	500	500	1	2	2	0	0	0
27014	3	50	50	gof	2	2	5	100	50	500	5000	500000	500	500	1	2	2	0	0	0
27049	3	50	50	gof	2	2	5	100	50	500	5000	500000	500	500	1	2	2	0	0	0
27048	3	50	50	gof	2	2	5	100	50	500	5000	500000	500	500	1	2	2	0	0	0
26878	3	50	50	gof	1	2	5	100	50	500	5000	500000	500	500	1	2	2	0	1	1
26953	3	50	50	gof	1	2	5	100	50	500	5000	500000	500	500	1	2	2	0	0	0
26751	3	50	50	gof	1	2	5	100	50	500	5000	500000	500	500	1	3	4	0	0	0
26629	3	50	50	gof	1	2	5	100	50	500	5000	500000	500	500	1	2	2	0	0	0
26646	3	50	50	gof	1	2	5	100	50	500	5000	500000	500	500	1	2	2	0	0	0
26977	3	50	50	gof	1	2	5	100	50	500	5000	500000	500	500	1	2	2	0	0	0
27007	3	50	50	gof	2	2	5	100	50	500	5000	500000	500	500	1	3	4	0	0	0
27077	3	50	50	gof	2	2	5	100	50	500	5000	500000	500	500	1	2	2	0	0	0
27088	3	50	50	gof	2	2	5	100	50	500	5000	500000	500	500	1	2	2	0	0	0
26999	3	50	50	gof	1	2	5	100	50	500	5000	500000	500	500	1	2	2	0	0	0
26871	3	50	50	gof	1	2	5	100	50	500	5000	500000	500	500	1	2	2	0	0	0
27294	3	50	50	gof	2	2	5	100	50	500	5000	500000	500	500	1	3	3	0	0	0
27006	3	50	50	gof	2	2	5	100	50	500	5000	500000	500	500	1	2	2	0	0	0
25759	3	50	50	gof	0	2	5	100	50	500	5000	500000	500	500	1	2	2	0	0	0
27105	3	50	50	gof	2	2	5	100	50	500	5000	500000	500	500	1	2	2	0	0	0
27119	3	50	50	gof	2	2	5	100	50	500	5000	500000	500	500	1	2	2	0	0	0
26497	3	50	50	gof	1	2	5	100	50	500	5000	500000	500	500	1	3	4	0	0	0
27170	3	50	50	gof	2	2	5	100	50	500	5000	500000	500	500	1	2	2	0	0	0
27155	3	50	50	gof	2	2	5	100	50	500	5000	500000	500	500	1	2	2	0	0	0
27071	3	50	50	gof	2	2	5	100	50	500	5000	500000	500	500	1	3	3	0	0	0
27198	3	50	50	gof	2	2	5	100	50	500	5000	500000	500	500	1	2	2	0	0	0
27137	3	50	50	gof	2	2	5	100	50	500	5000	500000	500	500	1	3	3	0	0	0
27140	3	50	50	gof	2	2	5	100	50	500	5000	500000	500	500	1	3	3	0	0	0
27120	3	50	50	gof	2	2	5	100	50	500	5000	500000	500	500	1	2	2	0	0	0
27116	3	50	50	gof	2	2	5	100	50	500	5000	500000	500	500	1	3	4	0	0	0
27092	3	50	50	gof	2	2	5	100	50	500	5000	500000	500	500	1	2	2	0	0	0
27241	3	50	50	gof	2	2	5	100	50	500	5000	500000	500	500	1	3	4	0	0	0
27208	3	50	50	gof	2	2	5	100	50	500	5000	500000	500	500	1	2	2	0	0	0
27055	3	50	50	gof	2	2	5	100	50	500	5000	500000	500	500	1	2	2	0	0	0
27209	3	50	50	gof	2	2	5	100	50	500	5000	500000	500	500	1	2	2	0	0	0
27086	3	50	50	gof	2	2	5	100	50	500	5000	500000	500	500	1	2	2	0	0	0
26711	3	50	50	gof	1	2	5	100	50	500	5000	500000	500	500	1	3	4	1	0	0
27285	3	50	50	gof	2	2	5	100	50	500	5000	500000	500	500	1	2	2	0	0	0
27064	3	50	50	gof	2	2	5	100	50	500	5000	500000	500	500	1	2	2	0	0	0
27185	3	50	50	gof	2	2	5	100	50	500	5000	500000	500	500	1	3	3	0	0	0
27135	3	50	50	gof	2	2	5	100	50	500	5000	500000	500	500	1	3	3	0	0	0
27106	3	50	50	gof	2	2	5	100	50	500	5000	500000	500	500	1	2	2	0	0	0
27078	3	50	50	gof	2	2	5	100	50	500	5000	500000	500	500	1	2	2	0	0	0
27183	3	50	50	gof	2	2	5	100	50	500	5000	500000	500	500	1	3	5	0	0	0
27253	3	50	50	gof	2	2	5	100	50	500	5000	500000	500	500	1	2	2	0	0	0
27177	3	50	50	gof	2	2	5	100	50	500	5000	500000	500	500	1	3	3	0	0	0
27326	3	50	50	gof	2	2	5	100	50	500	5000	500000	500	500	1	2	2	0	0	0
27237	3	50	50	gof	2	2	5	100	50	500	5000	500000	500	500	1	2	2	0	0	0
27300	3	50	50	gof	2	2	5	100	50	500	5000	500000	500	500	1	2	2	0	0	0
26296	3	50	50	gof	1	2	5	100	50	500	5000	500000	500	500	1	2	2	0	0	0
27233	3	50	50	gof	2	2	5	100	50	500	5000	500000	500	500	1	2	2	0	0	0
27536	3	50	50	gof	2	2	5	100	50	500	5000	500000	500	500	1	2	2	0	0	0
26008	3	50	50	gof	1	2	5	100	50	500	5000	500000	500	500	1	2	2	0	0	0
27411	3	50	50	gof	2	2	5	100	50	500	5000	500000	500	500	1	3	5	0	0	0
27343	3	50	50	gof	2	2	5	100	50	500	5000	500000	500	500	1	2	2	0	0	0
27186	3	50	50	gof	2	2	5	100	50	500	5000	500000	500	500	1	3	5	0	0	0
27518	3	50	50	gof	2	2	5	100	50	500	5000	500000	500	500	1	2	2	0	0	0
27372	3	50	50	gof	2	2	5	100	50	500	5000	500000	500	500	1	3	4	0	0	0
27303	3	50	50	gof	2	2	5	100	50	500	5000	500000	500	500	1	2	2	0	0	0
27193	3	50	50	gof	2	2	5	100	50	500	5000	500000	500	500	1	2	2	0	0	0
27470	3	50	50	gof	2	2	5	100	50	500	5000	500000	500	500	1	2	2	0	0	0
27505	3	50	50	gof	2	2	5	100	50	500	5000	500000	500	500	1	2	2	0	0	0
27512	3	50	50	gof	2	2	5	100	50	500	5000	500000	500	500	1	2	2	0	0	0
27599	3	50	50	gof	2	2	5	100	50	500	5000	500000	500	500	1	2	2	0	0	0
26626	3	50	50	gof	1	2	5	100	50	500	5000	500000	500	500	1	2	2	0	0	0
27445	3	50	50	gof	2	2	5	100	50	500	5000	500000	500	500	1	2	2	0	0	0
26602	3	50	50	gof	1	2	5	100	50	500	5000	500000	500	500	1	3	4	0	0	0
27461	3	50	50	gof	2	2	5	100	50	500	5000	500000	500	500	1	3	3	0	0	0
27471	3	50	50	gof	2	2	5	100	50	500	5000	500000	500	500	1	2	2	0	0	0
27347	3	50	50	gof	2	2	5	100	50	500	5000	500000	500	500	1	2	2	0	0	0
27499	3	50	50	gof	2	2	5	100	50	500	5000	500000	500	500	1	2	2	0	0	0
27604	3	50	50	gof	2	2	5	100	50	500	5000	500000	500	500	1	2	2	0	0	0
27365	3	50	50	gof	2	2	5	100	50	500	5000	500000	500	500	1	3	4	0	0	0
27112	3	50	50	gof	2	2	5	100	50	500	5000	500000	500	500	1	2	2	0	0	0
27020	3	50	50	gof	2	2	5	100	50	500	5000	500000	500	500	1	2	2	0	0	0
27582	3	50	50	gof	2	2	5	100	50	500	5000	500000	500	500	1	3	4	0	0	0
27485	3	50	50	gof	2	2	5	100	50	500	5000	500000	500	500	1	2	2	0	0	0
27596	3	50	50	gof	2	2	5	100	50	500	5000	500000	500	500	1	2	2	0	0	0
27651	3	50	50	gof	2	2	5	100	50	500	5000	500000	500	500	1	2	2	0	0	0
27516	3	50	50	gof	2	2	5	100	50	500	5000	500000	500	500	1	2	2	0	0	0
27611	3	50	50	gof	2	2	5	100	50	500	5000	500000	500	500	1	2	2	0	0	0
27796	3	50	50	gof	2	2	5	100	50	500	5000	500000	500	500	1	2	2	0	0	0
27665	3	50	50	gof	2	2	5	100	50	500	5000	500000	500	500	1	3	3	1	0	0
27675	3	50	50	gof	2	2	5	100	50	500	5000	500000	500	500	1	2	2	0	0	0
27676	3	50	50	gof	2	2	5	100	50	500	5000	500000	500	500	1	2	2	0	0	0
27685	3	50	50	gof	2	2	5	100	50	500	5000	500000	500	500	1	2	2	0	0	0
27779	3	50	50	gof	2	2	5	100	50	500	5000	500000	500	500	1	2	2	0	0	0
27748	3	50	50	gof	2	2	5	100	50	500	5000	500000	500	500	1	2	2	0	0	0
27794	3	50	50	gof	2	2	5	100	50	500	5000	500000	500	500	1	2	2	0	0	0
27893	3	50	50	gof	2	2	5	100	50	500	5000	500000	500	500	1	2	2	0	0	0
27627	3	50	50	gof	2	2	5	100	50	500	5000	500000	500	500	1	3	4	0	0	0
27795	3	50	50	gof	2	2	5	100	50	500	5000	500000	500	500	1	2	2	0	1	1
27902	3	50	50	gof	2	2	5	100	50	500	5000	500000	500	500	1	2	2	0	0	0
27822	3	50	50	gof	2	2	5	100	50	500	5000	500000	500	500	1	2	2	0	0	0
27583	3	50	50	gof	2	2	5	100	50	500	5000	500000	500	500	1	2	2	0	0	0
27870	3	50	50	gof	2	2	5	100	50	500	5000	500000	500	500	1	2	2	0	0	0
27880	3	50	50	gof	2	2	5	100	50	500	5000	500000	500	500	1	2	2	0	0	0
27741	3	50	50	gof	2	2	5	100	50	500	5000	500000	500	500	1	2	2	0	0	0
27811	3	50	50	gof	2	2	5	100	50	500	5000	500000	500	500	1	2	2	0	0	0
27919	3	50	50	gof	2	2	5	100	50	500	5000	500000	500	500	1	3	3	0	0	0
27861	3	50	50	gof	2	2	5	100	50	500	5000	500000	500	500	1	2	2	0	0	0
27900	3	50	50	gof	2	2	5	100	50	500	5000	500000	500	500	1	2	2	0	0	0
27917	3	50	50	gof	2	2	5	100	50	500	5000	500000	500	500	1	3	4	0	0	0
27162	3	50	50	gof	2	2	5	100	50	500	5000	500000	500	500	1	2	2	0	0	0
27728	3	50	50	gof	2	2	5	100	50	500	5000	500000	500	500	1	3	3	0	0	0
27684	3	50	50	gof	2	2	5	100	50	500	5000	500000	500	500	1	3	4	0	0	0
27731	3	50	50	gof	2	2	5	100	50	500	5000	500000	500	500	1	2	2	0	0	0
27978	3	50	50	gof	2	2	5	100	50	500	5000	500000	500	500	1	2	2	0	0	0
27970	3	50	50	gof	2	2	5	100	50	500	5000	500000	500	500	1	2	2	0	0	0
27929	3	50	50	gof	2	2	5	100	50	500	5000	500000	500	500	1	2	2	0	0	0
28033	3	50	50	gof	3	2	5	100	50	500	5000	500000	500	500	1	2	2	0	0	0
27267	3	50	50	gof	2	2	5	100	50	500	5000	500000	500	500	1	2	2	0	0	0
28035	3	50	50	gof	3	2	5	100	50	500	5000	500000	500	500	1	2	2	0	0	0
28038	3	50	50	gof	3	2	5	100	50	500	5000	500000	500	500	1	2	2	0	0	0
28083	3	50	50	gof	3	2	5	100	50	500	5000	500000	500	500	1	3	4	0	0	0
28031	3	50	50	gof	3	2	5	100	50	500	5000	500000	500	500	1	2	2	0	0	0
27890	3	50	50	gof	2	2	5	100	50	500	5000	500000	500	500	1	2	2	0	0	0
26850	3	50	50	gof	1	2	5	100	50	500	5000	500000	500	500	1	3	4	0	0	0
28167	3	50	50	gof	3	2	5	100	50	500	5000	500000	500	500	1	3	3	0	0	0
27549	3	50	50	gof	2	2	5	100	50	500	5000	500000	500	500	1	2	2	0	0	0
28058	3	50	50	gof	3	2	5	100	50	500	5000	500000	500	500	1	2	2	0	0	0
28029	3	50	50	gof	3	2	5	100	50	500	5000	500000	500	500	1	2	2	0	0	0
27610	3	50	50	gof	2	2	5	100	50	500	5000	500000	500	500	1	2	2	0	0	0
28071	3	50	50	gof	3	2	5	100	50	500	5000	500000	500	500	1	2	2	0	0	0
27831	3	50	50	gof	2	2	5	100	50	500	5000	500000	500	500	1	2	2	0	0	0
28040	3	50	50	gof	3	2	5	100	50	500	5000	500000	500	500	1	2	2	0	0	0
28171	3	50	50	gof	3	2	5	100	50	500	5000	500000	500	500	1	2	2	0	1	1
28002	3	50	50	gof	3	2	5	100	50	500	5000	500000	500	500	1	3	4	0	0	0
28063	3	50	50	gof	3	2	5	100	50	500	5000	500000	500	500	1	2	2	0	0	0
27441	3	50	50	gof	2	2	5	100	50	500	5000	500000	500	500	1	3	4	0	0	0
28107	3	50	50	gof	3	2	5	100	50	500	5000	500000	500	500	1	2	2	0	0	0
28045	3	50	50	gof	3	2	5	100	50	500	5000	500000	500	500	1	2	2	0	0	0
28149	3	50	50	gof	3	2	5	100	50	500	5000	500000	500	500	1	2	2	0	0	0
27916	3	50	50	gof	2	2	5	100	50	500	5000	500000	500	500	1	2	2	0	0	0
28143	3	50	50	gof	3	2	5	100	50	500	5000	500000	500	500	1	2	2	0	0	0
28130	3	50	50	gof	3	2	5	100	50	500	5000	500000	500	500	1	2	2	0	0	0
28168	3	50	50	gof	3	2	5	100	50	500	5000	500000	500	500	1	3	4	0	0	0
27848	3	50	50	gof	2	2	5	100	50	500	5000	500000	500	500	1	3	5	0	0	0
28208	3	50	50	gof	3	2	5	100	50	500	5000	500000	500	500	1	2	2	0	0	0
28240	3	50	50	gof	3	2	5	100	50	500	5000	500000	500	500	1	2	2	0	0	0
28209	3	50	50	gof	3	2	5	100	50	500	5000	500000	500	500	1	2	2	0	0	0
28227	3	50	50	gof	3	2	5	100	50	500	5000	500000	500	500	1	3	3	1	0	0
28148	3	50	50	gof	3	2	5	100	50	500	5000	500000	500	500	1	3	3	0	0	0
28297	3	50	50	gof	3	2	5	100	50	500	5000	500000	500	500	1	2	2	0	0	0
28267	3	50	50	gof	3	2	5	100	50	500	5000	500000	500	500	1	3	5	0	0	0
28271	3	50	50	gof	3	2	5	100	50	500	5000	500000	500	500	1	3	3	0	0	0
28320	3	50	50	gof	3	2	5	100	50	500	5000	500000	500	500	1	2	2	0	0	0
27834	3	50	50	gof	2	2	5	100	50	500	5000	500000	500	500	1	2	2	0	0	0
28289	3	50	50	gof	3	2	5	100	50	500	5000	500000	500	500	1	2	2	0	0	0
28389	3	50	50	gof	3	2	5	100	50	500	5000	500000	500	500	1	2	2	0	0	0
28434	3	50	50	gof	3	2	5	100	50	500	5000	500000	500	500	1	2	2	0	0	0
28252	3	50	50	gof	3	2	5	100	50	500	5000	500000	500	500	1	2	2	0	0	0
28463	3	50	50	gof	3	2	5	100	50	500	5000	500000	500	500	1	2	2	0	0	0
28370	3	50	50	gof	3	2	5	100	50	500	5000	500000	500	500	1	2	2	0	0	0
28350	3	50	50	gof	3	2	5	100	50	500	5000	500000	500	500	1	2	2	0	0	0
28365	3	50	50	gof	3	2	5	100	50	500	5000	500000	500	500	1	2	2	0	0	0
28523	3	50	50	gof	3	2	5	100	50	500	5000	500000	500	500	1	2	2	0	0	0
28185	3	50	50	gof	3	2	5	100	50	500	5000	500000	500	500	1	3	3	0	0	0
28343	3	50	50	gof	3	2	5	100	50	500	5000	500000	500	500	1	2	2	0	0	0
28249	3	50	50	gof	3	2	5	100	50	500	5000	500000	500	500	1	2	2	0	0	0
28619	3	50	50	gof	3	2	5	100	50	500	5000	500000	500	500	1	3	3	1	0	0
28326	3	50	50	gof	3	2	5	100	50	500	5000	500000	500	500	1	2	2	0	0	0
28280	3	50	50	gof	3	2	5	100	50	500	5000	500000	500	500	1	2	2	0	0	0
28471	3	50	50	gof	3	2	5	100	50	500	5000	500000	500	500	1	2	2	0	0	0
28349	3	50	50	gof	3	2	5	100	50	500	5000	500000	500	500	1	2	2	0	0	0
28748	3	50	50	gof	3	2	5	100	50	500	5000	500000	500	500	1	2	2	0	0	0
28678	3	50	50	gof	3	2	5	100	50	500	5000	500000	500	500	1	2	2	0	0	0
28312	3	50	50	gof	3	2	5	100	50	500	5000	500000	500	500	1	2	2	0	0	0
28519	3	50	50	gof	3	2	5	100	50	500	5000	500000	500	500	1	3	3	0	0	0
28700	3	50	50	gof	3	2	5	100	50	500	5000	500000	500	500	1	3	3	0	0	0
28400	3	50	50	gof	3	2	5	100	50	500	5000	500000	500	500	1	2	2	0	0	0
28908	3	50	50	gof	3	2	5	100	50	500	5000	500000	500	500	1	2	2	0	0	0
28293	3	50	50	gof	3	2	5	100	50	500	5000	500000	500	500	1	3	4	0	0	0
28863	3	50	50	gof	3	2	5	100	50	500	5000	500000	500	500	1	2	2	0	0	0
28812	3	50	50	gof	3	2	5	100	50	500	5000	500000	500	500	1	2	2	0	0	0
28155	3	50	50	gof	3	2	5	100	50	500	5000	500000	500	500	1	2	2	0	0	0
28791	3	50	50	gof	3	2	5	100	50	500	5000	500000	500	500	1	2	2	0	0	0
27806	3	50	50	gof	2	2	5	100	50	500	5000	500000	500	500	1	2	2	0	0	0
28682	3	50	50	gof	3	2	5	100	50	500	5000	500000	500	500	1	2	2	0	0	0
28413	3	50	50	gof	3	2	5	100	50	500	5000	500000	500	500	1	3	3	0	0	0
28742	3	50	50	gof	3	2	5	100	50	500	5000	500000	500	500	1	2	2	0	0	0
28634	3	50	50	gof	3	2	5	100	50	500	5000	500000	500	500	1	2	2	0	0	0
28447	3	50	50	gof	3	2	5	100	50	500	5000	500000	500	500	1	2	2	0	0	0
28880	3	50	50	gof	3	2	5	100	50	500	5000	500000	500	500	1	2	2	0	0	0
28977	3	50	50	gof	3	2	5	100	50	500	5000	500000	500	500	1	2	2	0	0	0
28980	3	50	50	gof	3	2	5	100	50	500	5000	500000	500	500	1	2	2	0	0	0
28617	3	50	50	gof	3	2	5	100	50	500	5000	500000	500	500	1	2	2	0	0	0
28958	3	50	50	gof	3	2	5	100	50	500	5000	500000	500	500	1	3	3	0	0	0
28920	3	50	50	gof	3	2	5	100	50	500	5000	500000	500	500	1	2	2	0	0	0
28970	3	50	50	gof	3	2	5	100	50	500	5000	500000	500	500	1	2	2	0	0	0
28346	3	50	50	gof	3	2	5	100	50	500	5000	500000	500	500	1	3	4	0	0	0
28887	3	50	50	gof	3	2	5	100	50	500	5000	500000	500	500	1	2	2	0	0	0
28627	3	50	50	gof	3	2	5	100	50	500	5000	500000	500	500	1	2	2	0	0	0
29114	3	50	50	gof	4	2	5	100	50	500	5000	500000	500	500	1	2	2	0	0	0
28926	3	50	50	gof	3	2	5	100	50	500	5000	500000	500	500	1	2	2	0	0	0
28643	3	50	50	gof	3	2	5	100	50	500	5000	500000	500	500	1	2	2	0	0	0
28373	3	50	50	gof	3	2	5	100	50	500	5000	500000	500	500	1	2	2	0	0	0
29004	3	50	50	gof	4	2	5	100	50	500	5000	500000	500	500	1	2	2	0	0	0
28865	3	50	50	gof	3	2	5	100	50	500	5000	500000	500	500	1	2	2	0	0	0
28857	3	50	50	gof	3	2	5	100	50	500	5000	500000	500	500	1	2	2	0	0	0
28976	3	50	50	gof	3	2	5	100	50	500	5000	500000	500	500	1	2	2	0	0	0
28990	3	50	50	gof	3	2	5	100	50	500	5000	500000	500	500	1	2	2	0	0	0
28946	3	50	50	gof	3	2	5	100	50	500	5000	500000	500	500	1	3	3	0	0	0
29148	3	50	50	gof	4	2	5	100	50	500	5000	500000	500	500	1	3	3	0	0	0
29001	3	50	50	gof	4	2	5	100	50	500	5000	500000	500	500	1	2	2	0	0	0
29194	3	50	50	gof	4	2	5	100	50	500	5000	500000	500	500	1	2	2	0	0	0
28650	3	50	50	gof	3	2	5	100	50	500	5000	500000	500	500	1	3	4	0	0	0
29146	3	50	50	gof	4	2	5	100	50	500	5000	500000	500	500	1	2	2	0	0	0
29344	3	50	50	gof	4	2	5	100	50	500	5000	500000	500	500	1	2	2	0	0	0
29062	3	50	50	gof	4	2	5	100	50	500	5000	500000	500	500	1	2	2	0	0	0
29197	3	50	50	gof	4	2	5	100	50	500	5000	500000	500	500	1	3	3	0	0	0
29304	3	50	50	gof	4	2	5	100	50	500	5000	500000	500	500	1	2	2	0	0	0
28153	3	50	50	gof	3	2	5	100	50	500	5000	500000	500	500	1	2	2	0	0	0
29242	3	50	50	gof	4	2	5	100	50	500	5000	500000	500	500	1	3	3	1	0	0
29096	3	50	50	gof	4	2	5	100	50	500	5000	500000	500	500	1	2	2	0	0	0
28870	3	50	50	gof	3	2	5	100	50	500	5000	500000	500	500	1	2	2	0	0	0
28639	3	50	50	gof	3	2	5	100	50	500	5000	500000	500	500	1	3	3	1	0	0
29158	3	50	50	gof	4	2	5	100	50	500	5000	500000	500	500	1	2	2	0	0	0
29350	3	50	50	gof	4	2	5	100	50	500	5000	500000	500	500	1	2	2	0	0	0
28945	3	50	50	gof	3	2	5	100	50	500	5000	500000	500	500	1	2	2	0	0	0
29444	3	50	50	gof	4	2	5	100	50	500	5000	500000	500	500	1	2	2	0	0	0
29416	3	50	50	gof	4	2	5	100	50	500	5000	500000	500	500	1	2	2	0	0	0
29441	3	50	50	gof	4	2	5	100	50	500	5000	500000	500	500	1	2	2	0	0	0
29575	3	50	50	gof	4	2	5	100	50	500	5000	500000	500	500	1	1	0	0	0	0
29287	3	50	50	gof	4	2	5	100	50	500	5000	500000	500	500	1	2	2	0	0	0
29005	3	50	50	gof	4	2	5	100	50	500	5000	500000	500	500	1	2	2	0	0	0
29353	3	50	50	gof	4	2	5	100	50	500	5000	500000	500	500	1	2	2	0	0	0
27712	3	50	50	gof	2	2	5	100	50	500	5000	500000	500	500	1	2	2	0	0	0
29372	3	50	50	gof	4	2	5	100	50	500	5000	500000	500	500	1	2	2	0	0	0
28720	3	50	50	gof	3	2	5	100	50	500	5000	500000	500	500	1	3	3	0	0	0
29479	3	50	50	gof	4	2	5	100	50	500	5000	500000	500	500	1	2	2	0	0	0
29116	3	50	50	gof	4	2	5	100	50	500	5000	500000	500	500	1	2	2	0	0	0
29490	3	50	50	gof	4	2	5	100	50	500	5000	500000	500	500	1	2	2	0	0	0
29192	3	50	50	gof	4	2	5	100	50	500	5000	500000	500	500	1	2	2	0	0	0
29022	3	50	50	gof	4	2	5	100	50	500	5000	500000	500	500	1	2	2	0	0	0
29527	3	50	50	gof	4	2	5	100	50	500	5000	500000	500	500	1	2	2	0	0	0
29128	3	50	50	gof	4	2	5	100	50	500	5000	500000	500	500	1	2	2	0	0	0
29462	3	50	50	gof	4	2	5	100	50	500	5000	500000	500	500	1	2	2	0	0	0
28798	3	50	50	gof	3	2	5	100	50	500	5000	500000	500	500	1	2	2	0	0	0
29546	3	50	50	gof	4	2	5	100	50	500	5000	500000	500	500	1	2	2	0	0	0
29510	3	50	50	gof	4	2	5	100	50	500	5000	500000	500	500	1	3	3	0	0	0
29507	3	50	50	gof	4	2	5	100	50	500	5000	500000	500	500	1	2	2	0	0	0
29115	3	50	50	gof	4	2	5	100	50	500	5000	500000	500	500	1	2	2	0	0	0
29504	3	50	50	gof	4	2	5	100	50	500	5000	500000	500	500	1	2	2	0	0	0
28566	3	50	50	gof	3	2	5	100	50	500	5000	500000	500	500	1	2	2	0	0	0
29487	3	50	50	gof	4	2	5	100	50	500	5000	500000	500	500	1	2	2	0	0	0
29083	3	50	50	gof	4	2	5	100	50	500	5000	500000	500	500	1	2	2	0	0	0
29299	3	50	50	gof	4	2	5	100	50	500	5000	500000	500	500	1	3	4	0	0	0
29472	3	50	50	gof	4	2	5	100	50	500	5000	500000	500	500	1	2	2	0	0	0
29561	3	50	50	gof	4	2	5	100	50	500	5000	500000	500	500	1	3	3	0	0	0
29400	3	50	50	gof	4	2	5	100	50	500	5000	500000	500	500	1	3	5	0	0	0
29522	3	50	50	gof	4	2	5	100	50	500	5000	500000	500	500	1	3	5	0	0	0
29643	3	50	50	gof	4	2	5	100	50	500	5000	500000	500	500	1	2	2	0	0	0
29585	3	50	50	gof	4	2	5	100	50	500	5000	500000	500	500	1	3	4	0	0	0
29422	3	50	50	gof	4	2	5	100	50	500	5000	500000	500	500	1	3	3	0	0	0
29631	3	50	50	gof	4	2	5	100	50	500	5000	500000	500	500	1	2	2	0	0	0
29579	3	50	50	gof	4	2	5	100	50	500	5000	500000	500	500	1	3	5	0	0	0
29683	3	50	50	gof	4	2	5	100	50	500	5000	500000	500	500	1	3	4	1	0	0
29573	3	50	50	gof	4	2	5	100	50	500	5000	500000	500	500	1	3	4	0	0	0
28341	3	50	50	gof	3	2	5	100	50	500	5000	500000	500	500	1	2	2	0	0	0
29694	3	50	50	gof	4	2	5	100	50	500	5000	500000	500	500	1	2	2	0	0	0
29784	3	50	50	gof	4	2	5	100	50	500	5000	500000	500	500	1	2	2	0	0	0
29171	3	50	50	gof	4	2	5	100	50	500	5000	500000	500	500	1	2	2	0	0	0
28905	3	50	50	gof	3	2	5	100	50	500	5000	500000	500	500	1	2	2	0	0	0
29543	3	50	50	gof	4	2	5	100	50	500	5000	500000	500	500	1	2	2	0	0	0
29764	3	50	50	gof	4	2	5	100	50	500	5000	500000	500	500	1	2	2	0	0	0
29844	3	50	50	gof	4	2	5	100	50	500	5000	500000	500	500	1	2	2	0	0	0
29736	3	50	50	gof	4	2	5	100	50	500	5000	500000	500	500	1	2	2	0	0	0
29805	3	50	50	gof	4	2	5	100	50	500	5000	500000	500	500	1	2	2	0	0	0
29855	3	50	50	gof	4	2	5	100	50	500	5000	500000	500	500	1	2	2	0	0	0
29815	3	50	50	gof	4	2	5	100	50	500	5000	500000	500	500	1	2	2	0	0	0
29797	3	50	50	gof	4	2	5	100	50	500	5000	500000	500	500	1	2	2	0	0	0
29756	3	50	50	gof	4	2	5	100	50	500	5000	500000	500	500	1	2	2	0	0	0
29896	3	50	50	gof	4	2	5	100	50	500	5000	500000	500	500	1	2	2	0	0	0
29369	3	50	50	gof	4	2	5	100	50	500	5000	500000	500	500	1	3	3	0	0	0
29663	3	50	50	gof	4	2	5	100	50	500	5000	500000	500	500	1	2	2	0	0	0
29883	3	50	50	gof	4	2	5	100	50	500	5000	500000	500	500	1	2	2	0	0	0
29469	3	50	50	gof	4	2	5	100	50	500	5000	500000	500	500	1	2	2	0	0	0
30027	4	50	50	none	0	2	5	100	50	500	5000	500000	500	500	1	2	2	0	0	0
29031	3	50	50	gof	4	2	5	100	50	500	5000	500000	500	500	1	3	4	0	0	0
29608	3	50	50	gof	4	2	5	100	50	500	5000	500000	500	500	1	2	2	0	0	0
29330	3	50	50	gof	4	2	5	100	50	500	5000	500000	500	500	1	2	2	0	1	1
29635	3	50	50	gof	4	2	5	100	50	500	5000	500000	500	500	1	2	2	0	0	0
29380	3	50	50	gof	4	2	5	100	50	500	5000	500000	500	500	1	2	2	0	0	0
28866	3	50	50	gof	3	2	5	100	50	500	5000	500000	500	500	1	2	2	0	0	0
29873	3	50	50	gof	4	2	5	100	50	500	5000	500000	500	500	1	2	2	0	0	0
29671	3	50	50	gof	4	2	5	100	50	500	5000	500000	500	500	1	3	4	0	0	0
29695	3	50	50	gof	4	2	5	100	50	500	5000	500000	500	500	1	3	5	0	0	0
29138	3	50	50	gof	4	2	5	100	50	500	5000	500000	500	500	1	3	4	0	0	0
29846	3	50	50	gof	4	2	5	100	50	500	5000	500000	500	500	1	2	2	0	0	0
29935	3	50	50	gof	4	2	5	100	50	500	5000	500000	500	500	1	2	2	0	0	0
29906	3	50	50	gof	4	2	5	100	50	500	5000	500000	500	500	1	2	2	0	0	0
29867	3	50	50	gof	4	2	5	100	50	500	5000	500000	500	500	1	2	2	0	0	0
30009	4	50	50	none	0	2	5	100	50	500	5000	500000	500	500	1	3	4	0	0	0
29997	3	50	50	gof	4	2	5	100	50	500	5000	500000	500	500	1	2	2	0	0	0
29918	3	50	50	gof	4	2	5	100	50	500	5000	500000	500	500	1	3	3	0	0	0
29798	3	50	50	gof	4	2	5	100	50	500	5000	500000	500	500	1	2	2	0	0	0
30031	4	50	50	none	0	2	5	100	50	500	5000	500000	500	500	1	2	2	0	0	0
29880	3	50	50	gof	4	2	5	100	50	500	5000	500000	500	500	1	3	3	0	0	0
29780	3	50	50	gof	4	2	5	100	50	500	5000	500000	500	500	1	2	2	0	0	0
29907	3	50	50	gof	4	2	5	100	50	500	5000	500000	500	500	1	2	2	0	0	0
29625	3	50	50	gof	4	2	5	100	50	500	5000	500000	500	500	1	3	4	0	0	0
30059	4	50	50	none	0	2	5	100	50	500	5000	500000	500	500	1	2	2	0	0	0
30078	4	50	50	none	0	2	5	100	50	500	5000	500000	500	500	1	2	2	0	0	0
30197	4	50	50	none	0	2	5	100	50	500	5000	500000	500	500	1	2	2	0	0	0
29820	3	50	50	gof	4	2	5	100	50	500	5000	500000	500	500	1	2	2	0	0	0
29551	3	50	50	gof	4	2	5	100	50	500	5000	500000	500	500	1	2	2	0	1	1
29583	3	50	50	gof	4	2	5	100	50	500	5000	500000	500	500	1	3	3	0	0	0
29911	3	50	50	gof	4	2	5	100	50	500	5000	500000	500	500	1	3	3	0	0	0
29983	3	50	50	gof	4	2	5	100	50	500	5000	500000	500	500	1	3	4	0	0	0
30029	4	50	50	none	0	2	5	100	50	500	5000	500000	500	500	1	3	3	0	0	0
30011	4	50	50	none	0	2	5	100	50	500	5000	500000	500	500	1	2	2	0	1	1
30042	4	50	50	none	0	2	5	100	50	500	5000	500000	500	500	1	2	2	0	1	1
30084	4	50	50	none	0	2	5	100	50	500	5000	500000	500	500	1	2	2	0	0	0
29342	3	50	50	gof	4	2	5	100	50	500	5000	500000	500	500	1	2	2	0	0	0
30025	4	50	50	none	0	2	5	100	50	500	5000	500000	500	500	1	2	2	0	0	0
30110	4	50	50	none	0	2	5	100	50	500	5000	500000	500	500	1	2	2	0	0	0
29421	3	50	50	gof	4	2	5	100	50	500	5000	500000	500	500	1	2	2	0	0	0
29821	3	50	50	gof	4	2	5	100	50	500	5000	500000	500	500	1	2	2	0	0	0
30060	4	50	50	none	0	2	5	100	50	500	5000	500000	500	500	1	4	8	1	0	0
29817	3	50	50	gof	4	2	5	100	50	500	5000	500000	500	500	1	2	2	0	0	0
30115	4	50	50	none	0	2	5	100	50	500	5000	500000	500	500	1	3	3	0	0	0
30133	4	50	50	none	0	2	5	100	50	500	5000	500000	500	500	1	2	2	0	0	0
30116	4	50	50	none	0	2	5	100	50	500	5000	500000	500	500	1	2	2	0	0	0
29916	3	50	50	gof	4	2	5	100	50	500	5000	500000	500	500	1	2	2	0	0	0
29819	3	50	50	gof	4	2	5	100	50	500	5000	500000	500	500	1	2	2	0	0	0
30161	4	50	50	none	0	2	5	100	50	500	5000	500000	500	500	1	2	2	0	0	0
30054	4	50	50	none	0	2	5	100	50	500	5000	500000	500	500	1	2	2	0	1	1
30109	4	50	50	none	0	2	5	100	50	500	5000	500000	500	500	1	3	3	0	0	0
30165	4	50	50	none	0	2	5	100	50	500	5000	500000	500	500	1	2	2	0	0	0
30153	4	50	50	none	0	2	5	100	50	500	5000	500000	500	500	1	2	2	0	0	0
30193	4	50	50	none	0	2	5	100	50	500	5000	500000	500	500	1	2	2	0	0	0
30128	4	50	50	none	0	2	5	100	50	500	5000	500000	500	500	1	2	2	0	0	0
30158	4	50	50	none	0	2	5	100	50	500	5000	500000	500	500	1	2	2	0	0	0
29246	3	50	50	gof	4	2	5	100	50	500	5000	500000	500	500	1	2	2	0	0	0
30141	4	50	50	none	0	2	5	100	50	500	5000	500000	500	500	1	3	5	0	0	0
30178	4	50	50	none	0	2	5	100	50	500	5000	500000	500	500	1	4	4	2	0	0
30097	4	50	50	none	0	2	5	100	50	500	5000	500000	500	500	1	3	3	0	0	0
30387	4	50	50	none	0	2	5	100	50	500	5000	500000	500	500	1	2	2	0	0	0
[truncated: 76,286 more rows]
