# Supplementary material for: Heritable epigenetic changes are constrained by the dynamics of regulatory architectures
Source: bioRxiv preprint, doi:10.1101/2023.06.07.544138, version 3 (2023-12-08)
Supplement: Table S4 [file 544138_file06.xlsx]

## Sheet: Heritable_RNA_silencing_with_de
BehaviorSpace results (NetLogo 6.1.1)
Heritable_RNA_silencing_with_developmental_time_v4.nlogo [turtles = entities/sensors]
Heritable_RNA_silencing_exploration_with_365_tick_generation_10_generations
01/09/2021 12:24:45:863 -0500
min-pxcor	max-pxcor	min-pycor	max-pycor
-10	10	-10	10
[run number]	[step]	count turtles	count active-links	count active-links with [color = black]
3	1	8	10	2
5	1	8	8	0
4	1	8	8	0
6	1	9	13	2
7	2	9	12	2
9	1	8	8	0
2	1	9	12	2
10	1	9	11	4
11	1	8	11	2
13	1	9	12	4
12	3	8	11	2
1	1	8	8	0
15	1	8	8	0
17	2	8	8	0
16	1	9	14	5
18	1	8	8	0
19	1	8	8	0
21	9	8	7	2
22	1	9	12	2
23	5	9	12	2
24	1	9	12	2
25	1	9	12	2
26	1	9	12	2
8	4	8	8	0
14	30	9	12	2
27	8	8	8	0
30	1	8	8	0
28	1	8	8	0
29	1	8	10	2
33	1	9	15	4
32	3	9	13	2
35	1	9	14	4
34	3	8	12	3
36	1	8	8	0
37	1	9	13	2
38	1	8	8	0
20	5	8	11	2
41	1	9	15	3
40	1	9	12	2
42	1	7	7	0
44	1	9	12	2
43	4	9	13	2
45	1	9	11	4
47	1	9	13	2
46	1	8	8	0
49	1	9	12	2
39	1	9	13	2
48	1	9	12	4
51	1	9	13	2
52	1	8	8	2
54	2	9	12	2
50	15	9	15	3
56	1	8	8	0
55	1	9	13	2
53	1	9	12	2
59	1	9	13	2
60	1	9	12	2
61	1	8	8	0
62	1	9	12	2
63	1	8	7	2
64	2	9	12	2
31	43	8	8	0
65	1	7	4	0
67	1	9	13	2
66	2	9	12	2
69	1	8	8	0
70	1	9	12	2
58	3	7	8	1
72	1	8	8	0
71	1	8	8	0
73	3	7	7	1
75	1	9	14	5
74	1	9	10	4
76	1	9	12	2
77	1	8	8	0
78	2	9	12	2
79	1	9	12	2
68	15	9	15	3
82	1	9	13	2
83	1	9	12	2
80	3	8	8	4
81	9	7	9	2
86	1	9	12	2
84	7	10	16	4
87	1	9	12	2
88	1	9	12	2
89	1	8	11	3
90	1	9	12	2
92	1	9	12	2
85	5	7	10	2
93	1	9	12	2
94	1	9	12	2
96	1	8	8	0
95	1	8	8	0
97	2	8	8	0
98	1	8	4	2
99	2	9	12	2
101	1	9	12	2
100	1	9	13	2
102	3	8	11	3
57	15	10	16	4
91	1	9	12	2
105	1	8	8	0
106	1	8	8	0
107	1	9	12	2
108	4	9	11	4
109	1	8	8	0
110	1	9	12	2
111	3	9	14	3
112	1	8	11	2
114	1	9	12	2
115	1	9	13	4
116	1	9	13	2
117	1	9	12	2
104	9	9	14	3
119	1	9	12	2
113	12	9	12	2
120	1	9	12	2
121	1	9	13	2
122	1	8	8	0
123	1	9	12	2
124	1	8	7	2
125	1	9	12	2
126	1	8	8	0
127	1	9	14	4
129	1	9	10	4
128	1	9	12	2
130	1	9	12	2
118	32	9	12	2
132	1	8	8	0
131	1	9	12	2
135	1	9	13	2
134	1	9	14	3
133	2	9	12	2
137	1	7	7	0
138	1	8	8	0
139	1	9	13	2
140	1	7	2	0
142	1	8	8	0
141	1	8	8	0
143	2	9	12	2
144	1	9	14	3
146	1	9	13	2
136	12	8	8	0
147	1	8	8	0
148	1	7	7	0
149	1	9	12	2
151	1	9	13	2
150	7	9	12	2
152	1	9	12	2
153	2	8	8	0
154	1	9	12	2
155	1	8	8	0
156	3	9	12	2
157	1	8	8	0
158	1	8	8	0
159	1	8	8	0
160	1	9	12	2
161	3	8	9	3
162	1	8	6	2
163	1	9	12	2
164	1	8	8	0
165	2	8	8	0
166	1	9	12	2
167	2	9	12	2
168	2	9	12	2
169	1	8	8	0
170	1	9	12	2
171	3	9	13	2
173	1	9	12	2
174	1	9	12	2
175	1	9	12	2
176	1	8	8	0
177	1	9	14	3
178	1	9	14	4
179	1	9	14	3
145	129	8	10	1
180	1	7	7	0
181	5	8	10	1
183	1	8	8	0
182	5	9	13	3
185	1	9	12	2
184	5	9	14	3
187	1	8	8	0
188	1	9	12	2
189	1	8	8	0
190	1	8	8	0
186	5	8	11	2
192	1	9	12	2
191	4	9	12	2
193	1	9	12	2
194	1	8	9	2
196	2	9	12	2
197	1	9	13	3
198	1	8	8	0
199	1	9	12	2
200	1	9	12	2
172	1	8	11	2
201	1	8	8	0
202	1	8	8	0
203	2	9	13	4
204	5	9	14	3
206	1	9	12	2
205	3	9	14	4
207	3	8	11	2
209	1	7	7	0
210	1	9	12	2
208	3	7	9	4
211	1	8	8	0
212	1	9	12	2
213	1	9	12	2
214	1	8	8	0
215	1	8	10	2
217	1	8	6	2
216	1	9	12	2
218	1	8	6	2
219	1	9	14	3
221	1	9	12	2
222	2	9	12	2
220	10	9	12	2
223	1	8	8	0
224	1	8	6	2
225	1	7	9	2
226	1	9	12	2
227	1	9	12	2
228	5	9	13	2
230	2	9	12	2
231	15	9	12	4
229	92	9	12	2
233	2	9	12	2
234	1	8	8	0
195	183	9	9	4
235	1	7	2	0
237	1	9	12	2
238	1	9	12	2
239	1	9	14	3
240	2	9	12	2
236	1	9	13	2
241	1	9	12	2
242	1	9	12	2
243	1	8	8	0
244	1	9	12	2
245	1	9	12	2
247	1	9	12	2
246	1	8	11	2
249	1	8	10	1
250	1	8	8	0
251	3	9	12	2
252	1	9	12	2
253	1	9	13	2
254	1	9	13	2
255	1	9	13	3
256	4	9	13	2
257	1	9	12	2
258	1	7	3	0
248	92	9	13	2
260	1	9	13	3
261	5	9	12	2
262	1	9	12	2
263	1	9	12	2
232	275	9	13	2
265	1	9	12	2
266	1	9	12	2
267	1	8	8	0
268	1	9	13	2
269	1	9	12	2
270	3	9	9	4
271	1	9	9	4
272	1	8	8	0
273	1	9	12	2
274	1	7	10	4
275	1	9	13	2
276	3	8	8	0
277	1	9	12	2
278	1	8	5	2
279	1	8	8	0
280	1	9	12	2
281	1	8	8	0
282	1	9	12	2
264	28	9	12	2
283	1	9	12	2
284	1	9	12	2
286	1	9	12	2
287	2	9	12	4
288	1	9	12	2
289	1	9	12	2
290	1	8	8	0
291	1	9	13	3
292	2	9	12	2
293	1	9	12	4
294	1	8	8	0
295	1	8	5	2
296	1	9	12	2
297	1	9	12	2
298	1	8	8	0
299	4	9	13	2
300	1	8	8	0
301	1	8	4	2
302	1	8	8	0
303	1	9	12	2
304	1	8	12	3
305	1	9	13	2
306	1	8	4	2
307	1	9	13	2
308	1	9	13	3
309	1	8	8	0
310	1	9	12	2
311	3	9	15	3
312	3	9	13	2
313	1	9	12	2
314	1	8	8	4
315	1	9	12	2
316	1	9	12	2
317	5	9	14	2
318	1	7	7	0
319	4	9	13	2
320	2	9	12	2
285	92	9	9	4
322	1	9	12	2
323	1	9	12	2
321	2	9	12	2
324	1	9	10	4
325	1	9	12	2
326	1	9	12	2
327	1	8	8	0
328	5	9	12	2
330	1	9	12	2
331	1	9	12	2
332	1	8	8	0
329	1	9	12	2
333	1	8	8	0
335	1	9	12	2
336	1	9	12	2
337	2	9	12	2
338	3	9	15	3
339	1	9	12	2
340	1	9	12	2
341	1	9	12	2
342	1	9	14	3
343	1	9	12	2
344	1	9	12	2
334	1	9	14	4
345	3	9	13	2
346	1	8	8	0
347	1	9	12	2
349	1	8	7	2
350	1	9	12	2
351	105	9	12	2
352	1	9	13	2
353	4	10	16	4
354	11	9	13	2
348	15	9	14	3
356	1	8	8	0
357	1	9	12	2
358	1	9	13	2
359	1	8	7	2
360	3	9	10	4
361	1	8	8	0
362	1	9	12	2
363	1	9	12	2
364	1	7	7	0
365	5	9	15	4
366	1	8	10	4
367	1	8	8	0
368	3	9	12	2
369	7	8	8	0
370	1	9	12	2
371	1	9	12	2
372	1	8	8	0
373	2	9	13	2
374	2	9	12	2
375	1	9	13	3
376	1	8	6	2
377	1	8	8	0
378	1	9	9	4
379	5	8	10	1
380	1	9	10	4
381	1	8	6	2
382	1	8	5	2
355	1	9	12	2
384	1	8	8	0
385	1	9	13	3
386	1	8	8	0
387	1	9	12	2
388	1	9	13	3
389	92	4	1	0
383	1	9	12	2
390	1	9	12	2
392	1	9	12	2
393	1	8	8	0
394	1	9	11	4
395	2	9	12	2
396	1	8	8	0
391	1	9	12	2
259	735	9	13	2
398	3	8	11	3
399	3	9	12	2
400	1	9	12	2
401	3	9	15	4
403	1	9	12	2
402	1	9	14	4
405	1	9	11	4
406	1	9	12	2
404	8	10	16	4
407	3	9	12	2
408	1	8	10	1
409	1	9	15	5
410	2	9	13	2
411	1	9	12	2
412	3	9	9	4
413	2	9	12	2
415	1	8	7	2
414	1	8	8	0
417	2	8	8	0
418	1	7	7	0
419	1	9	12	4
416	1	8	8	0
420	1	9	12	2
421	1	8	7	2
422	1	9	13	2
424	1	8	8	0
423	4	9	13	2
425	1	9	12	2
426	1	9	13	2
427	1	9	12	2
428	1	8	8	0
430	1	8	8	0
431	9	9	14	3
397	1	9	12	2
432	1	8	8	0
429	25	9	12	2
434	1	8	6	2
435	5	7	10	2
436	3	8	11	2
438	1	8	9	2
437	1	9	12	2
439	1	9	12	2
440	1	9	12	2
441	1	8	8	0
442	1	9	10	4
443	1	8	8	0
433	3	9	14	2
444	1	8	8	0
445	1	9	12	2
447	1	9	12	2
448	1	8	8	2
450	1	9	12	2
451	1	9	12	2
452	1	9	12	4
453	1	9	10	4
454	1	8	11	2
455	2	8	8	0
456	1	8	8	0
457	1	9	12	2
458	1	9	13	2
459	2	8	8	0
460	1	9	12	2
461	1	9	12	2
462	2	9	12	2
463	2	9	12	2
464	2	9	12	2
465	1	8	8	0
446	3	8	8	0
466	3	7	11	3
467	1	9	12	2
469	1	9	12	2
470	2	9	13	2
471	1	9	13	3
472	1	8	8	0
473	1	9	12	2
468	22	9	12	2
474	1	8	8	0
475	1	9	12	2
476	1	8	8	2
477	1	9	11	4
478	1	9	12	2
480	1	9	12	2
479	2	9	12	2
481	1	9	13	4
482	1	8	8	0
483	2	9	12	2
484	1	9	12	2
485	1	9	8	4
486	1	9	12	2
487	1	8	8	0
488	1	8	11	1
489	1	9	12	2
490	1	8	8	0
491	2	7	3	0
492	1	8	8	2
493	5	9	12	2
495	2	9	12	2
494	4	9	12	2
496	1	9	12	2
497	1	9	12	2
499	1	7	6	2
449	1	10	17	4
501	1	9	12	2
502	2	9	12	4
503	1	9	12	2
504	1	8	8	0
505	1	8	8	0
506	1	8	8	0
507	1	8	8	0
508	1	8	8	0
509	1	7	7	0
510	1	9	12	2
511	1	9	12	4
512	1	9	12	2
513	9	9	12	4
514	1	8	8	0
498	147	9	11	4
515	3	9	13	4
516	1	9	13	2
518	3	9	9	4
519	1	9	13	3
520	1	9	12	2
521	1	7	7	0
517	9	9	14	4
523	1	9	13	2
522	1	8	11	3
524	1	9	12	2
525	2	9	12	2
526	1	9	12	2
527	1	9	12	2
528	1	8	8	0
529	1	9	12	2
530	8	9	12	2
500	129	9	12	2
533	9	9	9	4
534	1	8	10	3
535	1	9	15	4
536	1	8	8	0
537	1	8	8	0
538	1	8	8	0
539	1	7	1	0
540	1	9	13	2
541	1	8	8	0
542	1	8	9	2
543	1	8	6	2
544	3	9	15	4
545	1	8	8	0
546	1	9	12	4
547	25	9	12	2
548	1	8	6	2
549	1	6	3	0
550	1	8	8	0
551	2	9	12	2
552	14	9	12	2
553	3	9	12	2
554	15	9	14	3
555	9	7	7	3
556	1	7	7	2
557	1	8	8	0
558	1	9	12	2
531	92	2	0	0
560	1	9	12	2
561	32	9	12	2
562	2	9	12	2
563	1	8	8	0
564	1	9	12	2
565	5	8	12	2
566	1	9	12	2
559	1	9	12	2
568	1	8	8	0
569	1	8	8	0
570	1	8	8	0
571	1	9	12	2
572	1	8	8	0
573	1	9	13	3
574	4	10	16	4
575	1	7	4	1
576	1	9	12	2
577	7	10	17	4
578	5	9	12	2
579	1	8	8	0
580	1	8	6	2
581	15	9	15	3
582	1	9	12	2
583	1	9	12	2
584	2	9	13	2
585	1	9	12	2
586	1	9	12	2
587	9	9	14	3
588	1	9	12	2
589	1	8	8	0
590	1	9	12	2
591	1	9	12	2
592	1	9	13	4
593	1	8	8	0
594	1	9	12	2
595	3	8	7	2
596	6	9	12	2
597	2	8	8	0
598	1	9	12	2
103	2300	9	13	2
600	2	9	12	2
567	360	9	12	2
602	1	9	12	2
603	1	9	12	2
604	1	9	13	2
605	1	9	13	3
601	1	8	8	0
606	1	9	12	2
608	1	9	13	2
607	1	8	8	0
609	3	9	14	4
611	1	9	12	2
612	1	9	12	2
613	1	9	13	3
614	1	9	14	2
610	1	7	1	0
615	2	10	16	4
616	1	9	12	2
617	2	9	12	2
599	3	9	15	4
618	1	9	12	2
620	2	9	13	2
622	1	8	10	1
623	1	9	13	2
624	1	9	12	2
621	1	9	14	3
625	1	9	13	2
627	1	9	13	3
626	1	7	7	0
629	1	9	14	4
628	92	8	10	2
631	1	8	12	3
632	28	9	11	4
633	2	9	12	2
634	1	8	7	2
635	1	9	14	3
636	1	9	12	2
637	1	8	8	0
638	1	9	12	2
639	1	8	8	0
640	4	9	12	2
641	1	9	13	4
642	1	9	13	2
643	9	9	13	2
644	1	9	12	2
645	2	8	8	2
646	2	9	12	2
619	3	9	12	2
648	1	8	10	2
647	6	9	13	2
650	1	9	13	4
649	1	9	12	2
651	1	7	3	0
652	1	8	11	2
653	3	9	14	3
655	5	7	9	1
656	1	9	12	2
657	1	8	8	0
654	5	9	12	2
658	1	9	12	5
660	1	8	6	2
659	1	9	12	2
662	1	9	11	4
663	1	8	9	4
661	9	9	13	2
665	1	9	13	2
664	2	9	12	2
666	1	9	12	2
668	5	9	14	4
667	15	8	12	2
670	1	8	8	0
671	1	9	11	4
672	1	8	8	0
673	1	8	10	2
674	2	8	8	0
675	1	9	13	2
669	42	9	12	2
677	1	9	12	2
678	2	9	12	2
679	1	9	12	2
680	1	8	7	2
676	3	8	11	2
681	1	9	12	2
682	1	9	12	2
683	1	8	8	0
685	1	9	9	4
684	1	9	13	2
686	3	9	12	2
688	1	9	12	2
687	1	9	13	2
690	1	9	13	3
689	4	9	12	2
691	15	8	11	1
693	1	7	2	0
694	1	9	13	3
695	2	9	12	2
696	2	9	12	2
697	1	9	9	4
698	1	9	12	2
699	1	9	12	2
700	2	8	8	0
701	1	8	11	2
702	1	9	12	2
703	1	9	12	2
704	2	8	8	0
705	2	9	12	2
706	1	9	14	2
707	1	8	8	0
708	1	8	8	0
709	110	9	13	2
710	1	8	8	0
711	1	9	12	2
712	1	8	10	2
713	1	7	5	1
714	1	9	13	3
715	3	8	10	1
716	1	9	12	2
692	183	9	11	4
717	1	9	12	2
718	1	9	13	3
719	1	9	12	2
720	1	8	8	0
721	1	8	8	0
722	1	9	12	2
723	1	9	11	4
724	1	7	6	3
726	1	7	7	3
725	9	8	12	1
728	2	9	10	4
729	1	8	8	0
730	1	9	12	2
731	1	8	8	0
732	1	9	12	2
733	1	8	8	0
532	1625	9	15	3
735	1	9	12	2
736	1	8	11	2
737	1	9	12	2
738	1	8	8	0
739	2	8	8	0
740	1	9	13	2
741	2	9	12	2
742	1	9	12	2
743	2	9	13	2
744	1	8	8	0
745	1	9	12	2
746	1	9	13	3
747	5	9	14	3
748	7	9	12	4
749	1	7	7	0
750	1	8	8	0
751	1	9	12	2
752	15	9	14	2
727	3	10	17	4
753	3	6	3	1
754	1	8	8	0
755	1	8	9	2
756	2	9	12	2
758	1	9	12	4
757	1	8	8	2
759	1	9	12	2
760	1	9	13	3
762	1	8	8	0
761	1	7	4	0
764	1	9	13	3
763	3	9	14	3
765	1	9	12	2
767	1	8	8	0
766	3	9	11	4
768	2	9	12	2
770	1	8	8	0
769	1	8	8	0
771	1	9	14	4
772	3	9	14	3
774	1	9	13	2
775	1	8	8	0
776	1	9	12	2
773	13	9	13	2
777	1	9	13	3
778	1	9	12	2
779	1	9	12	2
780	1	8	9	2
782	1	9	13	2
781	1	9	15	4
784	2	9	12	2
785	1	9	12	2
786	1	9	12	2
787	3	8	8	3
788	1	9	12	2
734	457	9	10	4
789	158	9	13	2
790	5	8	11	4
791	1	9	12	2
792	1	8	8	0
794	1	8	8	0
793	1	9	14	4
795	1	9	13	2
797	1	8	8	0
796	4	9	12	4
799	4	9	12	2
798	5	9	14	4
800	1	8	6	2
802	1	8	11	4
801	1	8	7	2
783	1	10	16	4
803	6	9	13	2
805	1	9	12	4
806	1	8	11	2
808	1	8	7	2
804	31	9	12	2
810	1	8	8	0
811	6	9	9	4
812	1	9	12	2
813	2	8	8	0
809	5	9	15	5
814	2	9	11	4
815	1	9	12	2
816	3	9	12	2
807	1	9	12	2
818	1	9	13	2
819	1	9	12	2
820	1	9	12	2
817	1	9	12	2
823	1	9	15	4
821	2	10	17	4
824	1	9	12	2
825	1	9	12	2
826	1	9	12	2
827	1	8	8	0
829	1	8	8	0
828	1	9	13	2
830	1	9	12	4
832	1	9	12	2
833	1	9	12	2
834	1	9	13	2
831	5	9	13	4
835	1	9	12	2
836	1	9	12	2
837	2	8	8	0
838	1	9	12	2
839	2	9	12	2
840	1	9	12	2
841	1	9	12	2
842	1	9	14	4
844	1	9	12	2
843	1	8	6	2
845	1	8	8	0
847	1	8	8	0
846	1	9	12	2
848	1	9	12	2
849	1	9	12	2
851	1	9	12	2
852	1	8	8	0
850	1	9	12	2
853	1	9	12	2
854	1	8	8	2
855	1	8	8	0
856	1	9	14	2
857	1	8	8	0
859	1	8	8	0
860	1	8	8	0
861	1	9	12	2
858	15	9	14	4
862	1	9	12	2
863	1	9	12	2
864	1	7	3	0
865	1	9	12	2
867	1	9	12	2
868	1	9	14	2
866	3	8	12	1
869	1	9	12	2
871	1	8	9	2
870	1	9	12	2
872	1	7	7	0
873	1	9	12	2
874	4	9	12	2
875	1	8	8	0
876	1	9	12	2
878	1	8	11	2
877	5	9	14	3
879	1	9	13	2
881	1	9	12	2
880	1	8	8	0
882	1	9	12	2
883	1	8	11	2
884	2	9	13	3
885	1	9	12	2
886	1	9	11	4
888	1	8	8	0
889	1	9	12	2
890	1	8	8	0
891	1	9	12	2
892	1	9	12	2
893	1	9	12	2
894	3	9	13	4
895	1	9	12	2
896	1	9	12	2
897	1	9	12	2
898	4	9	12	2
887	92	9	13	2
899	1	9	12	2
900	2	9	12	2
901	3	7	7	3
903	2	9	12	4
902	4	9	12	2
904	1	8	8	0
905	1	9	14	4
906	1	9	13	2
907	1	9	12	2
908	1	9	11	4
909	1	8	8	0
910	1	8	8	0
911	1	8	8	0
912	1	8	8	2
913	1	9	13	2
915	1	9	12	2
916	1	8	8	0
917	1	8	6	2
918	1	9	12	2
919	1	9	12	2
920	1	9	12	2
921	1	8	11	2
922	1	8	8	0
923	1	9	12	2
924	2	8	8	0
925	15	5	4	0
926	1	9	12	2
927	1	8	8	0
928	2	9	11	4
929	1	9	12	2
930	7	9	13	2
822	3	9	13	2
932	1	9	12	2
931	26	9	12	2
934	2	9	10	4
914	92	9	14	4
936	1	9	13	2
933	5	8	13	3
937	1	9	12	4
939	1	9	12	2
938	1	9	12	2
935	13	9	12	2
940	3	9	14	3
941	2	9	12	2
942	1	9	12	2
944	1	8	6	3
943	3	8	12	3
946	1	9	12	2
947	1	9	12	2
949	1	8	8	0
950	1	9	12	2
951	1	8	10	1
952	1	9	13	2
953	1	9	14	4
954	2	9	12	2
945	33	9	12	2
948	1	9	12	2
956	1	9	13	3
955	1	9	10	4
959	1	9	9	4
958	3	9	12	2
960	1	9	13	2
961	1	7	7	1
962	3	8	8	0
964	1	8	5	3
965	2	9	12	2
966	1	9	12	2
967	1	9	12	2
968	2	9	12	2
969	2	9	12	2
970	1	9	12	4
971	2	9	12	2
972	1	7	5	1
973	2	9	12	2
974	2	8	8	0
957	1	10	17	5
976	1	9	14	3
977	1	8	8	0
978	2	9	13	2
979	1	8	8	0
980	1	8	10	2
981	1	9	12	2
630	183	9	14	3
982	1	9	12	2
983	1	9	13	3
984	1	9	9	4
985	3	9	14	3
986	2	9	12	2
975	201	9	13	4
988	1	8	10	1
989	1	9	12	4
991	3	9	12	2
992	1	9	13	4
990	1	9	11	4
994	1	8	8	2
987	1	8	7	2
995	1	9	12	2
997	3	6	5	2
996	1	9	13	2
963	92	9	13	2
998	2	9	12	2
1000	1	9	13	3
1002	1	9	12	2
1001	1	9	13	2
999	1	8	8	0
993	1	8	8	0
1004	1	6	0	0
1003	1	9	12	2
1007	1	9	12	2
1005	1	8	8	0
1009	1	8	8	0
1006	2	9	12	2
1008	9	9	14	4
1013	1	9	13	2
1010	3	8	10	3
1014	1	8	8	0
1016	1	8	8	0
1017	1	8	11	2
1018	1	8	10	2
1015	3	9	15	5
1019	1	8	8	0
1021	3	9	12	2
1022	3	9	14	4
1023	1	9	12	2
1020	9	9	15	3
1012	1	9	15	4
1025	1	8	8	0
1024	37	9	13	2
1027	1	9	12	2
1028	1	9	13	2
1030	1	8	9	3
1026	1	9	12	2
1031	1	9	12	2
1011	92	4	3	0
1034	1	9	12	2
1032	1	8	7	2
1036	1	9	12	2
1035	1	9	12	2
1033	1	9	13	4
1038	1	9	14	3
1029	1	9	12	2
1040	1	9	12	2
1037	1	9	12	2
1039	3	9	13	2
1042	1	9	12	2
1044	1	8	8	0
1041	1	9	12	2
1047	1	9	12	2
1046	1	8	8	0
1045	1	8	8	0
1049	1	9	12	2
1048	1	8	8	0
1051	3	9	12	4
1052	2	9	13	4
1043	1	9	15	3
1053	1	9	12	2
1056	2	9	12	2
1054	1	8	8	0
1057	1	9	12	2
1059	1	8	8	0
1058	1	9	15	3
1050	9	8	9	2
1060	3	9	12	2
1061	1	9	13	3
1062	3	9	15	3
1055	2	9	13	4
1064	1	8	8	0
1065	2	8	8	0
1063	15	8	10	2
1067	2	9	12	2
1068	1	8	8	0
1071	1	9	9	4
1066	1	9	12	2
1070	3	9	15	4
1069	9	8	11	1
1072	1	8	8	0
1076	1	6	4	0
1073	1	8	11	1
1075	1	9	12	2
1077	3	9	12	2
1078	2	9	13	2
1079	1	9	12	2
1074	1	9	12	2
1082	1	9	12	2
1084	1	9	12	2
1083	1	6	5	1
1080	1	8	8	0
1085	1	9	12	2
1086	1	9	12	2
1087	2	9	12	2
1088	1	7	7	0
1090	1	9	12	2
1089	1	9	12	2
1093	3	9	11	4
1094	3	8	12	2
1095	1	7	2	0
1096	1	9	12	2
1081	1	9	12	2
1091	15	9	10	4
1097	1	8	11	1
1099	1	9	12	2
1100	1	8	11	2
1101	1	9	12	2
1103	2	9	11	4
1098	2	9	12	2
1104	3	8	12	1
1102	1	9	13	3
1106	1	9	10	4
1107	1	9	12	2
1092	92	9	15	3
1109	1	8	10	1
1110	1	8	8	0
1105	2	9	12	2
1112	1	8	8	0
1113	1	9	12	2
1114	2	9	12	2
1115	1	9	12	2
1116	5	9	14	3
1117	1	9	14	4
1118	1	9	10	4
1108	3	9	14	3
1119	3	8	8	0
1121	1	9	13	2
1122	1	9	12	2
1124	1	8	8	0
1120	9	8	11	2
1126	1	9	12	2
1123	1	8	8	0
1127	3	8	10	2
1128	2	9	12	2
1129	1	8	8	0
1111	110	9	14	2
1130	1	8	8	0
1131	1	9	12	2
1132	1	9	12	2
1133	1	8	10	2
1135	1	8	11	2
1137	1	9	13	2
1136	3	9	10	4
1138	1	9	12	2
1139	1	9	12	2
1125	12	9	13	2
1141	1	8	5	2
1140	3	9	13	2
1142	1	9	15	3
1144	1	9	12	2
1146	1	8	10	1
1147	3	8	10	4
1134	92	8	10	2
1149	1	8	8	0
1148	1	9	12	2
1145	3	9	14	3
1151	3	9	13	2
1143	15	9	12	4
1152	1	8	8	0
1150	15	9	14	4
1155	2	9	13	2
1154	1	8	8	0
1153	1	7	5	1
1159	2	9	12	4
1158	1	8	8	0
1157	1	9	13	2
1160	1	9	15	3
1161	1	9	12	2
1156	1	9	12	2
1163	1	8	8	0
1164	1	8	8	0
1166	1	8	8	0
1168	1	9	13	2
1169	1	9	13	2
1162	1	8	10	1
1170	1	8	8	0
1172	3	9	14	3
1173	2	8	8	0
1171	3	9	12	2
1165	2	9	12	2
1174	2	8	8	0
1177	1	9	12	2
1178	1	9	12	2
1179	3	8	7	2
1180	5	9	12	2
1175	1	9	12	2
1176	1	9	10	4
1181	1	9	12	2
1183	1	8	8	0
1184	1	8	8	0
1185	1	9	13	2
1186	1	7	7	0
1187	1	9	12	2
1188	1	9	12	2
1189	1	9	12	2
1191	1	9	12	2
1182	3	9	12	2
1192	1	9	12	2
1194	1	9	13	2
1193	1	8	8	0
1196	1	9	12	2
1190	1	9	11	4
1198	1	9	12	2
1197	1	8	12	2
1199	2	9	12	2
1200	2	9	13	2
1201	2	9	13	3
1202	1	9	12	2
1203	1	9	12	2
1205	1	9	12	2
1204	2	9	10	4
1207	2	9	10	4
1208	1	7	1	0
1209	1	9	13	2
1210	1	8	8	0
1211	1	8	8	0
1212	1	9	13	2
1206	92	9	15	3
1214	1	9	12	2
1213	1	8	8	0
1216	1	9	12	2
1217	2	10	16	4
1218	1	9	12	2
1167	237	9	14	4
1220	1	9	13	2
1219	1	9	12	2
1222	1	8	8	0
1221	1	9	12	2
1224	1	9	12	2
1225	2	8	8	0
1223	1	8	7	2
1227	1	9	12	2
1228	1	8	8	0
1229	1	9	12	2
1230	1	8	10	1
1231	1	9	12	2
1232	1	8	8	2
1233	5	8	11	1
1234	1	8	8	0
1235	3	9	12	2
1236	2	9	12	2
1195	457	9	12	2
1238	1	8	8	0
1239	1	8	8	0
1240	1	9	12	4
1241	1	8	8	0
1242	3	9	12	2
1243	1	8	8	0
1244	1	8	6	2
1237	255	9	13	4
1246	1	8	8	0
1245	3	9	13	3
1247	1	9	9	4
1249	1	9	12	2
1250	1	8	8	0
1251	1	8	8	0
1252	1	9	14	2
1253	1	9	12	2
1254	1	9	12	2
1255	1	8	8	0
1256	1	8	8	0
1257	1	9	13	2
1258	1	9	12	2
1259	1	9	12	2
1260	1	9	12	2
1261	1	8	11	4
1262	1	8	8	2
1248	92	9	14	3
1263	1	8	8	0
1264	15	8	11	3
1266	1	9	12	2
1267	1	9	12	2
1268	1	8	4	2
1269	1	9	12	2
1270	2	8	8	0
1271	1	8	8	0
1272	2	9	13	4
1265	7	9	12	2
1273	1	8	5	2
1275	1	8	8	0
1276	1	9	12	2
1277	1	8	8	0
1278	1	8	8	0
1279	1	8	8	0
1280	2	9	13	3
1274	3	8	13	4
1281	7	9	12	2
1283	1	9	12	2
1284	1	8	8	0
1282	2	9	12	2
1285	2	9	12	2
1287	1	9	11	4
1288	1	7	5	0
1286	1	9	12	2
1289	3	7	11	3
1291	1	8	8	0
1292	1	9	12	2
1293	2	9	12	2
1294	1	9	12	2
1290	2	9	12	2
1295	1	8	8	0
1297	2	9	12	2
1298	1	9	12	2
1299	1	8	8	0
1296	1	9	12	2
1300	2	9	12	2
1302	1	9	15	3
1303	2	8	8	2
1301	1	9	12	2
1304	1	9	15	4
1305	1	7	3	0
1307	3	9	10	4
1308	2	9	12	2
1309	1	9	12	2
1310	1	8	9	3
1311	1	8	8	0
1312	1	9	12	2
1313	1	9	12	2
1314	1	8	8	0
1315	1	8	10	2
1306	1	9	12	2
1316	1	8	8	0
1317	1	9	12	2
1318	1	8	8	0
1319	3	9	12	2
1320	2	9	12	2
1321	3	9	11	4
1323	1	9	13	3
1322	1	9	12	2
1324	3	9	14	3
1326	1	9	12	2
1327	1	9	12	2
1328	1	9	13	2
1325	1	9	13	3
1329	2	9	11	4
1331	5	8	11	2
1330	1	8	8	0
1332	1	9	12	2
1334	1	8	8	0
1333	1	8	8	0
1335	1	9	12	2
1337	1	9	12	2
1338	4	9	11	4
1339	2	9	12	2
1336	1	7	3	0
1340	1	8	8	0
1341	1	7	6	1
1342	2	9	12	2
1344	1	8	8	0
1343	1	9	12	2
1345	2	9	12	2
1347	4	9	12	2
1346	1	8	8	0
1348	1	8	8	4
1350	1	9	12	2
1349	1	9	12	2
1351	1	9	12	2
1353	1	8	8	0
1354	3	9	13	2
1355	1	9	12	2
1356	1	9	12	2
1357	1	7	6	2
1358	129	8	8	2
1359	1	8	8	0
1360	4	9	13	2
1361	1	9	11	4
1362	2	9	12	2
1352	1	10	17	4
1364	1	8	8	0
1365	2	9	12	2
1366	1	9	13	2
1367	1	7	2	0
1368	1	9	12	2
1369	3	9	13	4
1370	1	8	8	0
1371	1	9	13	3
1372	1	9	12	2
1373	1	9	12	2
1374	1	7	8	2
1375	1	9	13	3
1376	1	9	12	2
1377	1	9	12	2
1378	5	9	14	3
1379	1	9	12	2
1380	10	9	12	2
1381	2	9	13	2
1382	1	9	12	2
1383	1	8	5	2
1384	1	8	8	0
1385	1	7	7	0
1386	1	9	12	2
1387	1	9	12	2
1388	5	8	11	1
1389	3	9	12	2
1390	2	9	12	2
1391	3	9	12	2
1392	1	7	5	1
1363	745	9	14	2
1394	2	10	17	4
1393	1	9	12	2
1395	1	9	12	2
1397	1	9	12	2
1398	1	9	12	2
1399	3	9	12	2
1400	1	9	12	2
1401	2	9	12	2
1402	1	9	12	2
1403	1	9	13	2
1404	1	9	13	2
1405	1	8	7	2
1406	1	8	8	0
1407	1	8	9	4
1408	1	8	8	0
1409	1	8	8	0
1410	1	9	12	2
1396	1	9	12	2
1411	1	8	8	0
1412	1	8	8	0
1414	1	9	13	2
1413	68	9	12	2
1416	1	9	12	2
1417	15	8	8	2
1418	1	6	6	0
1419	1	8	8	0
1420	1	9	14	2
1421	1	9	12	2
1226	1	9	12	2
1423	1	9	12	2
1424	2	9	12	2
1425	2	9	12	2
1426	1	8	11	2
1427	1	8	8	0
1428	1	9	12	2
1429	1	8	8	0
1430	15	9	14	3
1431	3	6	6	1
1432	1	9	12	2
1433	1	9	13	2
1434	2	9	12	2
1435	1	9	12	2
1436	7	9	12	2
1437	2	9	12	2
1438	1	9	12	4
1439	1	9	12	2
1440	1	9	13	3
1441	1	8	8	0
1442	2	9	12	2
1443	1	8	8	0
1444	1	9	10	4
1445	1	9	12	2
1446	1	9	12	2
1447	1	9	12	2
1448	1	9	15	3
1449	1	7	7	0
1415	1	9	13	2
1450	1	9	12	2
1452	2	9	12	2
1453	1	9	12	2
1454	1	8	8	0
1455	1	7	3	0
1456	2	9	12	2
1457	3	9	15	3
1458	1	9	13	2
1459	1	9	13	2
1451	16	10	16	4
1461	1	9	12	2
1462	4	9	11	4
1460	5	7	8	1
1463	1	9	12	2
1464	1	9	12	2
1465	3	8	11	3
1466	2	9	12	2
1468	1	9	14	4
1469	1	8	8	0
1470	1	8	10	2
1471	1	9	12	2
1467	1	8	7	2
1473	1	8	8	0
1472	2	9	13	3
1474	1	8	8	0
1475	15	9	13	2
1476	2	8	8	0
1477	1	9	14	3
1478	2	9	13	2
1479	4	9	13	2
1480	1	8	8	0
1481	2	9	12	2
1483	2	8	8	0
1482	1	7	7	0
1485	1	8	8	0
1484	1	9	8	4
1486	2	9	12	2
1487	1	7	7	0
1488	1	9	12	2
1489	1	8	11	2
1490	1	8	8	0
1492	1	9	12	2
1493	1	9	12	2
1494	1	7	7	0
1495	1	9	14	4
1496	1	9	13	3
1497	1	9	13	3
1491	1	9	13	2
1498	1	9	12	2
1500	1	8	12	2
1501	1	9	13	2
1499	1	8	8	0
1502	1	7	8	0
1503	1	9	9	4
1504	1	9	12	2
1506	1	8	8	0
1505	1	9	13	3
1508	1	9	12	2
1507	1	8	8	0
1509	1	9	11	4
1510	1	8	8	0
1512	1	8	8	0
1511	1	9	12	2
1513	1	9	14	4
1514	1	8	8	0
1516	8	9	12	2
1515	9	9	15	3
1517	1	9	12	2
1518	1	8	8	3
1519	1	8	9	2
1520	2	9	13	2
1522	2	9	12	2
1523	1	9	12	2
1524	1	9	12	2
1521	1	8	8	0
1525	1	9	12	2
1526	1	8	8	0
1527	2	9	13	2
1528	1	9	13	2
1529	2	8	8	0
1530	1	9	11	4
1532	1	8	7	2
1531	1	8	8	0
1534	1	9	12	2
1533	1	9	13	2
1535	1	9	13	2
1537	1	8	10	3
1536	1	8	8	0
1539	1	9	12	2
1540	1	9	12	2
1538	15	8	11	2
1541	1	9	12	2
1542	9	9	13	4
1543	6	9	12	2
1544	1	9	13	2
1546	1	9	12	2
1545	1	9	12	2
1547	1	9	13	3
1215	3650	10	16	4
1548	1	9	14	3
1549	1	9	13	3
1550	1	9	13	3
1551	1	8	8	2
1554	1	9	12	2
1555	1	9	11	4
1556	1	9	12	2
1552	5	9	13	2
1557	1	9	12	2
1558	2	9	12	2
1559	1	9	12	2
1560	1	7	4	0
1553	1	8	8	0
1561	1	9	12	2
1563	1	8	6	2
1562	1	8	8	0
1564	3	9	12	2
1565	1	9	13	2
1566	1	9	14	4
1567	1	8	8	0
1568	1	9	12	2
1569	1	8	8	0
1570	1	9	12	2
1571	1	9	12	2
1572	2	9	12	2
1573	2	9	12	2
1574	2	9	10	4
1575	2	8	8	0
1576	1	8	9	2
1577	1	9	12	2
1578	1	9	12	2
1580	1	8	8	0
1579	1	7	7	0
1582	1	8	8	0
1583	1	8	8	0
1581	5	9	13	2
1584	2	9	12	2
1586	1	9	12	2
1585	15	8	12	2
1587	1	7	7	0
1589	26	9	12	2
1590	1	9	12	2
1591	1	9	12	2
1592	1	8	10	1
1593	1	9	13	2
1595	1	9	12	2
1596	3	8	8	0
1594	10	9	12	2
1597	1	9	14	4
1598	1	8	8	0
1600	1	8	8	2
1588	92	9	14	4
1601	4	9	12	2
1602	1	9	13	3
1603	1	8	8	0
1605	1	8	8	0
1606	1	9	12	2
1607	92	9	14	3
1608	1	9	14	3
1609	21	9	12	2
1604	1	10	17	5
1611	1	8	8	0
1612	2	8	8	0
1613	1	8	8	0
1422	985	9	15	4
1614	3	9	12	2
1616	9	9	13	2
1617	1	9	12	2
1618	1	9	13	4
1619	1	8	8	0
1610	3	9	13	3
1621	1	8	8	0
1622	1	9	12	2
1620	1	8	8	0
1624	1	8	6	2
1625	1	9	12	2
1626	1	8	8	0
1627	1	9	13	2
1628	1	9	12	2
1629	1	9	12	2
1623	1	9	12	2
1630	1	8	8	0
1631	1	7	2	0
1632	1	9	12	2
1633	4	9	13	3
1634	2	9	13	3
1635	1	8	10	2
1636	2	9	12	2
1637	2	9	13	2
1638	3	9	15	4
1640	15	9	15	3
1641	1	8	6	2
1642	1	9	11	4
1639	67	9	12	2
1644	1	9	15	5
1645	1	8	8	0
1646	1	9	12	2
1647	1	8	8	0
1648	1	8	8	0
1649	1	9	12	2
1650	8	9	13	2
1651	1	8	8	0
1652	1	7	2	0
1653	1	8	8	0
1643	110	9	14	3
1599	530	9	14	4
1655	1	9	12	2
1656	3	9	15	4
1654	3	8	12	1
1657	1	8	8	2
1659	1	9	12	2
1658	3	9	11	4
1660	2	9	10	4
1661	1	9	13	3
1662	1	8	11	2
1663	2	9	12	2
1664	3	9	8	4
1665	2	9	9	4
1667	1	9	12	2
1666	1	9	13	2
1669	1	8	11	2
1670	1	8	6	2
1668	1	8	8	0
1671	1	9	12	2
1673	2	9	12	4
1672	3	9	14	4
1675	1	9	12	2
1676	1	9	12	2
1674	2	9	12	2
1679	3	9	12	4
1678	3	9	13	2
1680	1	9	12	2
1681	1	9	12	2
1677	1	9	12	2
1682	1	9	15	4
1685	1	9	12	4
1684	3	8	8	2
1686	1	9	12	2
1683	7	9	13	2
1688	1	8	8	0
1687	3	9	12	2
1690	1	8	8	0
1691	1	9	12	2
1693	1	9	15	3
1694	1	9	12	2
1695	1	8	8	0
1689	11	9	12	2
1697	3	9	12	2
1696	1	9	13	3
1692	11	10	16	4
1699	1	8	8	0
1698	1	9	14	2
1700	1	9	12	2
1702	1	9	12	2
1703	1	9	12	2
1705	1	9	12	2
1706	5	8	11	2
1707	1	9	15	3
1704	9	9	12	2
1709	1	9	12	2
1708	1	9	13	2
1711	1	9	12	2
1710	2	9	12	2
1712	3	9	12	2
1714	1	9	12	2
1713	1	8	8	0
1715	2	9	13	2
1717	1	9	12	2
1718	1	8	8	0
1719	1	8	8	0
1720	1	9	12	2
1716	28	9	12	2
1721	4	9	12	2
1722	1	8	8	0
1723	1	9	12	2
1724	1	8	8	0
1725	1	9	12	2
1726	1	8	8	0
1727	1	9	12	2
1728	1	9	12	2
1729	1	9	12	2
1731	1	9	15	4
1730	1	9	14	4
1732	1	9	12	2
1733	3	9	12	2
1735	1	8	7	2
1734	9	8	12	3
1736	1	9	13	2
1738	1	9	12	2
1701	1	9	12	2
1737	10	9	10	4
1739	36	9	12	2
1741	1	9	12	2
1742	1	9	13	2
1744	1	8	8	0
1745	5	9	15	4
1746	1	8	8	0
1743	9	8	12	2
1747	2	9	12	2
1748	1	7	7	0
1750	1	9	12	2
1751	1	8	8	0
1752	1	8	8	0
1753	1	9	12	2
1754	1	8	8	0
1755	1	9	12	2
1756	1	9	12	2
1757	1	9	12	2
1758	1	9	12	2
1759	1	9	12	2
1760	1	9	12	2
1761	2	9	12	2
1762	1	9	13	2
1763	1	8	8	0
1764	1	9	12	2
1749	5	10	17	4
1765	1	9	13	3
1766	1	8	8	0
1767	2	9	12	2
1769	2	9	12	2
1768	1	9	12	2
1770	2	8	8	0
1772	1	8	10	2
1771	1	9	13	2
1773	1	9	12	2
1774	1	9	12	2
1775	9	8	10	1
1776	1	9	15	4
1777	1	9	12	2
1778	1	9	12	2
1779	1	9	13	4
1780	2	8	8	0
1781	1	9	12	2
1783	3	9	15	3
1782	1	9	12	2
1784	1	8	8	0
1785	1	9	12	2
1787	1	9	12	2
1786	4	9	12	2
1789	1	8	8	0
1788	1	7	7	0
1790	1	8	8	0
1791	2	9	12	2
1615	3	9	12	2
1794	2	9	12	2
1795	1	9	12	2
1796	1	8	10	2
1792	1	8	10	1
1798	1	9	13	2
1799	1	9	12	2
1800	1	8	8	0
1801	1	8	8	0
1802	3	9	12	2
1803	1	8	10	1
1804	1	8	11	2
1797	92	7	9	3
1805	1	8	8	0
1806	1	7	7	3
1807	1	8	8	2
1809	1	9	12	2
1810	3	8	9	4
1808	1	9	12	2
1811	1	8	8	0
1812	1	7	4	2
1813	1	8	8	0
1815	1	9	14	4
1816	1	9	12	2
1817	1	9	13	2
1818	5	9	12	2
1819	1	8	8	0
1820	1	8	8	0
1821	1	9	11	4
1822	1	9	12	2
1823	15	9	14	2
1814	92	5	5	2
1793	1	9	12	2
1825	1	8	8	0
1826	1	8	7	2
1827	1	9	13	2
1829	1	9	12	2
1824	3	9	14	3
1830	1	8	8	0
1831	1	9	12	2
1833	1	8	7	2
1834	1	9	12	2
1835	1	8	8	0
1828	1	9	13	2
1836	1	8	8	0
1837	1	8	8	0
1838	9	9	9	4
1840	1	9	13	2
1839	1	9	12	2
1842	1	8	8	0
1843	1	8	11	2
1844	1	8	8	0
1845	1	8	8	0
1846	2	9	12	2
1847	2	9	13	2
1848	5	9	11	4
1849	1	8	10	1
1841	58	9	13	2
1850	1	9	13	2
1852	2	8	9	2
1853	1	9	12	2
1854	1	9	13	3
1855	1	8	8	0
1856	1	8	10	2
1851	31	9	12	2
1857	1	9	12	2
1858	1	8	8	0
1859	1	9	12	2
1860	1	8	10	1
1861	2	9	12	2
1863	5	9	12	2
1864	1	8	8	0
1862	1	9	13	2
1865	1	8	10	1
1866	1	9	12	2
1868	1	9	12	2
1867	1	8	8	4
1870	2	9	12	2
1871	1	9	12	2
1872	2	9	12	2
1873	2	9	13	2
1874	1	7	6	0
1869	1	9	13	2
1876	1	9	12	2
1877	2	9	12	2
1878	3	9	14	4
1879	1	9	13	2
1875	92	7	9	0
1881	1	9	12	2
1832	1	10	16	4
1882	1	8	10	2
1884	1	8	8	4
1885	2	9	12	2
1883	1	9	12	2
1886	1	8	8	0
1888	1	9	12	2
1889	2	9	12	2
1887	1	7	7	2
1890	2	9	12	2
1892	1	8	8	0
1891	1	8	8	0
1893	19	9	12	2
1895	1	9	12	2
1894	1	9	12	2
1896	1	9	12	2
1898	1	8	11	2
1899	1	8	8	0
1897	1	9	13	3
1900	2	9	12	2
1902	3	9	15	4
1903	1	8	8	0
1904	1	9	12	2
1901	1	9	13	2
1905	1	9	13	2
1907	4	9	13	2
1906	1	9	12	2
1908	1	9	12	2
1910	1	9	11	4
1909	1	9	13	2
1911	1	9	12	2
1912	1	9	12	2
1913	1	8	8	0
1880	1	9	13	2
1916	1	8	8	0
1917	1	9	14	4
1918	1	9	13	2
1914	12	9	12	2
1915	3	9	11	4
1919	1	9	12	2
1920	1	9	13	2
1922	1	9	12	2
1924	1	8	8	0
1925	1	9	13	2
1923	5	8	12	2
1926	1	9	12	2
1928	1	8	8	0
1927	5	9	14	3
1929	1	7	4	0
1931	1	9	12	2
1932	1	9	12	2
1930	1	9	12	2
1933	1	9	12	2
1935	1	9	12	2
1936	1	9	15	3
1921	9	8	10	1
1937	1	9	12	2
1939	2	9	12	2
1940	1	8	6	2
1938	1	9	11	4
1941	5	9	15	3
1943	1	8	8	0
1944	1	9	13	2
1945	1	9	12	2
1946	1	9	12	2
1947	1	8	8	0
1948	1	7	7	0
1934	92	9	14	4
1949	1	9	12	2
1951	1	9	12	2
1950	1	8	8	2
1952	1	9	12	4
1953	1	9	12	2
1954	2	9	12	2
1955	3	9	15	4
1942	5	8	10	1
1957	1	7	3	0
1958	3	6	6	3
1960	1	8	8	0
1961	1	9	13	2
1959	1	8	8	0
1963	1	9	12	2
1962	15	9	12	2
1965	1	9	12	2
1956	3	9	15	3
1966	1	9	12	2
1968	5	9	12	2
1964	1	8	8	0
1969	1	9	12	2
1971	1	8	8	2
1972	1	9	12	2
1967	3	9	14	4
1970	15	8	13	3
1974	1	9	12	2
1975	1	8	8	0
1976	5	8	11	3
1977	1	8	8	0
1978	1	9	13	2
1979	1	9	12	2
1981	1	8	8	0
1982	3	9	14	3
1983	2	9	12	2
1984	1	9	12	2
1985	1	8	10	1
1986	1	7	1	0
1987	1	9	13	3
1988	110	9	14	4
1989	11	9	12	2
1990	2	9	12	2
1991	1	7	7	0
1992	4	9	12	2
1993	1	9	12	2
1994	1	8	8	0
1995	74	9	12	2
1996	1	9	12	2
[truncated: 8,007 more rows]
